# Supplementary material for: 1,1′-Dibenzyl-bis-(triazolyl)diphenylphosphine dioxide: a new efficient organocatalyst for silicon tetrachloride-mediated enantioselective Abramov-type phosphonylation of aldehydes with trialkyl phosphites
Source: Royal Society of Chemistry journal article supplement (doi:10.1039/c7ra10919a), 2017-01-01
Supplement: c7ra10919a1.pdf [file c7ra10919a1.pdf]

## Supporting information

### 1,1'-Dibenzyl-bis-(triazolyl)diphosphine dioxide: a new efficient organocatalyst for silicon tetrachloride-mediated enantioselective Abramov-type phosphonylation of aldehydes with trialkyl phosphites

Nicolas Sevrain,<sup>a</sup> Jean-Noel Volle,<sup>a</sup> Jean-Luc Pirat,<sup>a</sup> Tahar Ayad<sup>\*a,b</sup> and David Virieux<sup>\*a</sup>

<sup>a</sup>Institut Charles Gerhardt, CNRS UMR 5253, Ecole Nationale Supérieure de Chimie de Montpellier, 8 Rue de l'Ecole Normale, 34 296 Montpellier, France. <sup>b</sup>PSL Research University, Chimie Paristech-CNRS, Institut de Recherche de Chimie Paris, 75 005 Paris, France

tahar.ayad@chimie-paristech.fr, david.virieux@enscm.fr

#### Table of contents.

|                                                                                                |           |
|------------------------------------------------------------------------------------------------|-----------|
| <b>I. General informations .....</b>                                                           | <b>1</b>  |
| <b>II. Typical procedure for phosphonylation of aldehydes .....</b>                            | <b>1</b>  |
| <b>III. Description of phosphonylation products 2a–p .....</b>                                 | <b>2</b>  |
| <b>IV. <sup>1</sup>H and <sup>13</sup>C NMR Spectra of phosphonylation products 4a–p .....</b> | <b>7</b>  |
| <b>V. HPLC chromatogram of phosphonylation products 4a–p .....</b>                             | <b>23</b> |

#### I. General informations

All reactions were run under an atmosphere of nitrogen using standard Schlenk techniques otherwise stated. Liquid aldehydes were distilled under reduced pressure before use. Reaction vessels were flame-dried under vacuum and cooled under a stream of nitrogen. Solvents were carefully dried by conventional methods or were purified with an MBRAUN Solvent Purification System and degassed prior to use. Reactions were monitored by thin layer chromatography (TLC) on silica gel pre-coated plastic sheets (0.2 mm, Machery-Nagel). Visualization of the developed chromatogram was performed by UV light and revealed using either potassium permanganate or phosphomolybdic acid solutions. Flash column chromatography (FC) was performed on Merck silica gel (60, particle size 0.040-0.063 mm). <sup>1</sup>H, <sup>13</sup>C, <sup>19</sup>F and <sup>31</sup>P NMR spectra were recorded with a Bruker Avance 400 MHz spectrometer. Chemical shifts are reported in delta (δ) units, part per million (ppm) downfield from tetramethylsilane (TMS) relative to the residual deuterated solvent peaks. Coupling constants are reported in Hertz (Hz). The following abbreviations are used: s = singlet, d = doublet, t = triplet, q = quartet, m = multiplet, br = broad signal. Enantiomeric ratios were determined by HPLC analysis measured on a Shimadzu<sup>®</sup> LC 20 AHPLC with a UV/visible detector at 195nm using a chiral stationary phase column specified in the individual experiment, by comparing the samples with the appropriate racemic mixtures. Optical rotations were measured on a polarimeter at 589 nm (sodium lamp) with a Bellingham + Stanley<sup>®</sup> ADP 440 Polarimeter. High resolution mass spectroscopic (HRMS) analysis were measured on a Xevo G2 Q TOF spectrometer using the electrospray method by the Laboratoire de Mesures Physiques of the University of Montpellier

#### II. Typical procedure for phosphonylation of aldehydes

Aldehyde (0.5 mmol), iPr<sub>2</sub>NEt (1.5 mmol), nBu<sub>4</sub>NI (0.5 mmol) and (S)-1,1'-dibenzyl-bis-(triazolyl)diphosphine dioxide (5 mol %, 0.025 mmol) were mixed in anhydrous Et<sub>2</sub>O (2.0 mL) at -78 °C

in a flame dried Schlenk tube under nitrogen atmosphere. To this solution was added the desired phosphite (0.60 mmol) and then silicon tetrachloride (1M dichloromethane solution, 0.75 mL, 0.75 mmol) was introduced over 10min using a syringe. The reaction progress was monitored by TLC (ethyl acetate). Upon completion, deionized water (2 mL), saturated aqueous NaHCO<sub>3</sub> (5 mL), and ethyl acetate (5 mL) were carefully added to the reaction mixture. After being stirred for approximately 1 h, the reaction mixture was filtered through a short Celite pad. The two phases were then separated and the aqueous phase was extracted with ethyl acetate (3 × 5 mL). The combined organic layers were washed with brine, dried over anhydrous MgSO<sub>4</sub>, filtered, and evaporated under reduced pressure. The residue was purified by flash chromatography (silica gel, hexane /ethyl acetate : 50/50 to 0/100) to give the corresponding  $\alpha$ -hydroxyphosphonates. The enantiomeric ratios were determined by HPLC using IC or AS-H Chiralpak columns.

### III. Description of phosphonylation products 2a–p

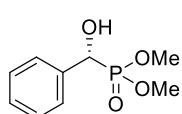

**Dimethyl (*R*)-(hydroxy(phenyl)methyl)phosphonate (4b) (known product)**<sup>1</sup>: Yield = 87%; [ $\alpha$ ]<sup>24</sup><sub>D</sub> = +30.4 (c 1.05, CHCl<sub>3</sub>) [Lit.<sup>1</sup> [ $\alpha$ ]<sup>27</sup><sub>D</sub> = +21.5 (c 0.80, CHCl<sub>3</sub>) for 28% ee (*R*)]. HPLC analysis: Chiralpak IC column, Hexane/*i*-PrOH 90:10, 1 mL/min,  $\lambda$  = 195 nm,  $t_R$  = 41.77 min (*S*, minor),  $t_R$  = 45.19 min (*R*, major); e.r. = 84.6:15.4. <sup>1</sup>H NMR (400.13 MHz, CDCl<sub>3</sub>)  $\delta$  7.50–7.48 (m, 2H), 7.40–7.31 (m, 3H), 5.06 (d,  $J$  = 10.9 Hz, 1H), 3.71 (d,  $J$  = 10.5 Hz, 3H), 3.67 (d,  $J$  = 10.4 Hz, 3H). <sup>13</sup>C NMR (100.61 MHz, CDCl<sub>3</sub>)  $\delta$  136.48 (d,  $J$  = 2.1 Hz), 128.54 (d,  $J$  = 2.5 Hz, two carbons), 128.39 (d,  $J$  = 3.2 Hz), 127.17 (d,  $J$  = 5.9 Hz, two carbons), 70.78 (d,  $J$  = 159.4 Hz), 54.07 (d,  $J$  = 7.0 Hz), 53.78 (d,  $J$  = 7.4 Hz). <sup>31</sup>P (CDCl<sub>3</sub>, 161.97 MHz)  $\delta$  (ppm) = 23.47 (s).

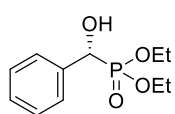

**Diethyl (*R*)-(hydroxy(phenyl)methyl)phosphonate (4a) (known product)**<sup>1</sup>: Yield = 91%; [ $\alpha$ ]<sup>24</sup><sub>D</sub> = 22.0 (c 1.09, CHCl<sub>3</sub>) [Lit.<sup>1</sup> [ $\alpha$ ]<sup>27</sup><sub>D</sub> = +14.8 (c 1.01, CHCl<sub>3</sub>) for 41% ee (*R*)]. HPLC analysis: Chiralpak IC column, Hexane/*i*-PrOH 90:10, 1 mL/min,  $\lambda$  = 195 nm,  $t_R$  = 26.96 min (*R*, major),  $t_R$  = 32.14 min (*S*, minor); e.r. = 84.5:15.5. <sup>1</sup>H NMR (400.13 MHz, CDCl<sub>3</sub>)  $\delta$  7.50–7.48 (m, 2H), 7.38–7.29 (m, 3H), 5.02 (dd,  $J$  = 10.8,  $J$  = 2.7 Hz, 1H), 4.10–3.92 (m, 4H), 3.63–3.50 (m, 1H), 1.27 (t,  $J$  = 7.1 Hz, 3H), 1.21 (t,  $J$  = 7.1 Hz, 3H); <sup>13</sup>C NMR (100.61 MHz, CDCl<sub>3</sub>)  $\delta$  136.85 (d,  $J$  = 1.9 Hz), 128.28 (d,  $J$  = 2.5 Hz, two carbons), 128.08 (d,  $J$  = 3.2 Hz), 127.22 (d,  $J$  = 5.8 Hz, two carbons), 70.86 (d,  $J$  = 159.2 Hz), 63.44 (d,  $J$  = 7.0 Hz), 63.09 (d,  $J$  = 7.3 Hz), 16.46 (d,  $J$  = 5.6 Hz), 16.43 (d,  $J$  = 5.5 Hz); <sup>31</sup>P (CDCl<sub>3</sub>, 161.97 MHz)  $\delta$  (ppm) = 21.35 (s).

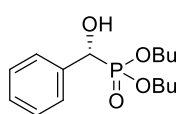

**Dibutyl (*R*)-(hydroxy(phenyl)methyl)phosphonate (4c) (known product)**<sup>1</sup>: Yield = 79%; [ $\alpha$ ]<sup>24</sup><sub>D</sub> = +11.5 (c 1.04, CHCl<sub>3</sub>) [Lit.<sup>1</sup> [ $\alpha$ ]<sup>27</sup><sub>D</sub> = +8.8 (c 1.05, CHCl<sub>3</sub>) for 33% ee (*R*)]. HPLC analysis: Chiralpak IC column, Hexane/*i*-PrOH 90:10, 1 mL/min,  $\lambda$  = 195 nm,  $t_R$  = 16.49 min (*R*, major),  $t_R$  = 19.11 min (*S*, minor); e.r. = 78.5:11.5. <sup>1</sup>H NMR (400.13 MHz, CDCl<sub>3</sub>)  $\delta$  7.49–7.46 (m, 2H), 7.37–7.28 (m, 3H), 5.02 (dd,  $J$  = 10.8,  $J$  = 4.9 Hz, 1H), 4.02–3.86 (m, 4H), 3.65–3.61 (m, 1H), 1.63–1.49 (m, 4H), 1.39–1.24 (m, 4H), 0.89 (t,  $J$  = 7.4 Hz, 4H), 0.86 (t,  $J$  = 7.4 Hz, 1H). <sup>13</sup>C NMR (100.61 MHz, CDCl<sub>3</sub>)  $\delta$  137.04 (d,  $J$  = 1.8 Hz), 128.14 (d,  $J$  = 2.5 Hz, two carbons), 127.91 (d,  $J$  = 3.1 Hz), 127.19 (d,  $J$  = 5.8 Hz, two carbons), 70.78 (d,  $J$  = 159.7 Hz), 67.06 (d,  $J$  = 7.3 Hz), 66.65 (d,  $J$  = 7.6 Hz), 32.53 (d,  $J$  = 5.7 Hz), 32.52 (d,  $J$  = 5.6 Hz), 18.62 (d,  $J$  = 4.6 Hz, two carbons), 13.59 (d,  $J$  = 1.4 Hz, two carbons). <sup>31</sup>P (CDCl<sub>3</sub>, 161.97 MHz)  $\delta$  (ppm) = 21.27 (s).

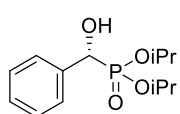

**Diisopropyl (*R*)-(hydroxy(phenyl)methyl)phosphonate (4d) (known product)**<sup>1</sup>: Yield = 92%; [ $\alpha$ ]<sup>24</sup><sub>D</sub> = +22.2 (c 1.08, CHCl<sub>3</sub>) [Lit.<sup>1</sup> [ $\alpha$ ]<sup>27</sup><sub>D</sub> = +12.2 (c 1.01, CHCl<sub>3</sub>) for 40% ee (*R*)]. HPLC analysis: Chiralpak IC column, Hexane/*i*-PrOH 90:10, 1 mL/min,  $\lambda$  = 195 nm,

<sup>1</sup> K. Nakanishi, S. Kotani, M. Sugiura, M. Nakajima, *Tetrahedron*, **2008**, *64*, 6415

$t_R = 12.33$  min (*R*, major),  $t_R = 17.07$  min (*S*, minor); e.r. = 88.4:11.6.  $^1\text{H}$  NMR (400.13 MHz,  $\text{CDCl}_3$ )  $\delta$  7.50–7.48 (m, 2H), 7.37–7.27 (m, 3H), 4.96 (d,  $J = 10.9$  Hz, 1H), 4.66–4.57 (m, 2H), 1.28 (d,  $J = 6.2$ , 3H), 1.27 (d,  $J = 6.2$ , 3H), 1.24 (d,  $J = 6.2$  Hz, 3H), 1.13 (d,  $J = 6.2$  Hz, 3H).  $^{13}\text{C}$  NMR (100.61 MHz,  $\text{CDCl}_3$ )  $\delta$  137.06 (d,  $J = 1.9$  Hz), 128.12 (d,  $J = 2.5$  Hz, two carbons), 127.89 (d,  $J = 3.1$  Hz), 127.39 (d,  $J = 5.8$  Hz, two carbons), 71.16 (d,  $J = 160.4$  Hz), 72.03 (d,  $J = 7.3$  Hz), 71.67 (d,  $J = 7.6$  Hz), 24.26 (d,  $J = 3.1$  Hz), 24.13 (d,  $J = 3.6$  Hz), 23.96 (d,  $J = 5.0$  Hz), 23.63 (d,  $J = 5.5$  Hz).  $^{31}\text{P}$  ( $\text{CDCl}_3$ , 161.97 MHz)  $\delta$  (ppm) = 19.74 (s).

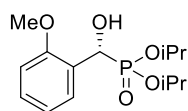

**Diisopropyl (*R*)-(hydroxy(2-methoxyphenyl)methyl)phosphonate (4e):** Yield = 79%;

$[\alpha]^{24}_D = +18.0$  (c 1.11,  $\text{CHCl}_3$ ). HPLC analysis: Chiralpak IC column, Hexane/*i*-PrOH 90:10, 1 mL/min,  $\lambda = 195$  nm,  $t_R = 25.55$  min (*R*, major),  $t_R = 48.97$  min (*S*, minor); e.r. = 72:28.  $^1\text{H}$  NMR (400.13 MHz,  $\text{CDCl}_3$ )  $\delta$  7.53 (dt,  $J = 7.6$ , 1.9 Hz, 1H), 7.28–7.23 (m, 1H), 6.97 (t,  $J = 7.5$  Hz, 1H), 6.86 (d,  $J = 8.3$  Hz, 1H), 5.34 (d,  $J = 12.4$  Hz, 1H), 4.77–4.66 (m, 1H), 4.59–4.48 (m, 1H), 3.85 (brs, 1H), 3.83 (s, 3H), 1.30 (d,  $J = 6.6$  Hz, 3H), 1.29 (d,  $J = 6.5$  Hz, 3H), 1.23 (d,  $J = 6.2$  Hz, 3H), 1.02 (t,  $J = 5.8$  Hz, 3H).  $^{13}\text{C}$  NMR (100.61 MHz,  $\text{CDCl}_3$ )  $\delta$  156.67 (d,  $J = 6.6$  Hz), 128.87, 128.86 (d,  $J = 7.0$  Hz), 125.80, 120.55 (d,  $J = 2.7$  Hz), 110.29 (d,  $J = 2.0$  Hz), 71.58 (d,  $J = 7.4$  Hz), 71.17 (d,  $J = 7.4$  Hz), 65.08 (d,  $J = 163.5$  Hz), 55.35 (s), 24.23 (d,  $J = 2.9$  Hz), 24.06 (d,  $J = 3.4$  Hz), 23.83 (d,  $J = 5.2$  Hz), 23.33 (d,  $J = 5.7$  Hz).  $^{31}\text{P}$  ( $\text{CDCl}_3$ , 161.97 MHz)  $\delta$  (ppm) = 20.71 (s). HRMS (ESI,  $\text{M}+\text{H}^+$ )  $m/z$  calcd for  $\text{C}_{14}\text{H}_{24}\text{O}_5\text{P}$ : 303.1361, found 303.1357.

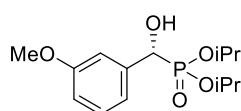

**Diisopropyl (*R*)-(hydroxy(3-methoxyphenyl)methyl)phosphonate (4f):** Yield =

93%;  $[\alpha]^{24}_D = +10.8$  (c 1.11,  $\text{CHCl}_3$ ). HPLC analysis: Chiralpak IC column, Hexane/*i*-PrOH 90:10, 1 mL/min,  $\lambda = 195$  nm,  $t_R = 34.82$  min (*S*, minor).  $t_R = 41.01$  min (*R*, major); e.r. = 88.5:11.5.  $^1\text{H}$  NMR (400.13 MHz,  $\text{CDCl}_3$ )  $\delta$  7.23 (t,  $J = 7.9$  Hz, 1H), 7.08–7.04 (m, 2H), 6.82 (d,  $J = 8.2$  Hz, 1H), 4.93 (d,  $J = 11.0$  Hz, 1H), 4.69–4.56 (m, 2H), 4.11 (brs, 1H), 3.79 (s, 3H), 1.26 (d,  $J = 6.2$  Hz, 9H), 1.15 (d,  $J = 6.2$  Hz, 3H).  $^{13}\text{C}$  NMR (100.61 MHz,  $\text{CDCl}_3$ )  $\delta$  159.34 (d,  $J = 2.5$  Hz), 138.77 (d,  $J = 1.3$  Hz), 128.83 (d,  $J = 2.4$  Hz), 119.80 (d,  $J = 6.0$  Hz), 113.72 (d,  $J = 3.1$  Hz), 112.46 (d,  $J = 5.6$  Hz), 71.92 (d,  $J = 7.4$  Hz), 71.53 (d,  $J = 7.6$  Hz), 70.89 (d,  $J = 161.3$  Hz), 55.12, 24.10 (d,  $J = 14.6$  Hz), 24.16 (d,  $J = 3.0$  Hz), 24.07 (d,  $J = 15.2$  Hz), 24.01 (d,  $J = 3.6$  Hz), 23.86 (d,  $J = 5.0$  Hz), 23.54 (d,  $J = 5.5$  Hz).  $^{31}\text{P}$  ( $\text{CDCl}_3$ , 161.97 MHz)  $\delta$  (ppm) = 19.79 (s). HRMS (ESI,  $\text{M}+\text{H}^+$ )  $m/z$  calcd for  $\text{C}_{14}\text{H}_{24}\text{O}_5\text{P}$ : 303.1361, found 303.1360.

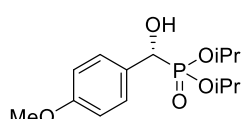

**Diisopropyl (*R*)-(hydroxy(4-methoxyphenyl)methyl)phosphonate (4j) (known**

**product)**<sup>2</sup>: Yield = 95%;  $[\alpha]^{24}_D = +15.5$  (c 1.03,  $\text{CHCl}_3$ ) [lit.<sup>2</sup>  $[\alpha]^{22}_D = -7.5$  (c 0.80,  $\text{CHCl}_3$ ) for 35% ee (*S*)]. HPLC analysis: Chiralpak IC column, Hexane/*i*-PrOH 90:10, 1 mL/min,  $\lambda = 195$  nm,  $t_R = 19.14$  min (*R*, major),  $t_R = 28.03$  min (*S*, minor); e.r. = 85.5:14.5.  $^1\text{H}$  NMR (400.13 MHz,  $\text{CDCl}_3$ )  $\delta$  7.41 (dd,  $J = 8.7$ , 2.1 Hz, 2H), 6.89 (d,  $J = 8.6$  Hz, 2H), 4.88 (dd,  $J = 9.9$ , 4.7 Hz, 1H), 4.68–4.56 (m, 2H), 3.81 (s, 3H), 2.79 (dd,  $J = 10.2$ , 4.8 Hz, 1H), 1.30–1.25 (m, 9H), 1.13 (d,  $J = 6.2$  Hz, 3H).  $^{13}\text{C}$  NMR (100.61 MHz,  $\text{CDCl}_3$ )  $\delta$  159.36 (d,  $J = 2.8$  Hz), 129.18 (d,  $J = 1.7$  Hz), 128.73 (d,  $J = 6.1$  Hz), 113.55 (d,  $J = 2.1$  Hz), 71.86 (d,  $J = 7.3$  Hz), 71.52 (d,  $J = 7.6$  Hz), 70.64 (d,  $J = 162.7$  Hz), 55.28 (s), 24.25 (d,  $J = 3.0$  Hz), 24.12 (d,  $J = 3.5$  Hz), 23.97 (d,  $J = 5.0$  Hz), 23.66 (d,  $J = 5.4$  Hz).  $^{31}\text{P}$  ( $\text{CDCl}_3$ , 161.97 MHz)  $\delta$  (ppm) = 20.00 (s).

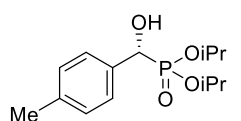

**Diisopropyl (*R*)-(hydroxy(4-methylphenyl)methyl)phosphonate (4h) (known**

**product)**<sup>2</sup>: Yield = 94%;  $[\alpha]^{24}_D = +23.0$  (c 1.04,  $\text{CHCl}_3$ ). HPLC analysis: Chiralpak IC column, Hexane/*i*-PrOH 90:10, 1 mL/min,  $\lambda = 195$  nm,  $t_R = 14.40$  min (*R*, major),  $t_R = 23.31$  min (*S*, minor); e.r. = 86.5:13.5.  $^1\text{H}$  NMR (400.13 MHz,  $\text{CDCl}_3$ )  $\delta$  7.37 (dd,

<sup>2</sup> K. V. Zaitsev, M. V. Bermeshev, A. A. Samsonov, J. F. Oprunenko, A. V. Churakov, J. A. L. Howard, S. S. Karlov, G. S. Zaitseva, *New J. Chem.*, **2008**, 32, 1415.

$J = 8.1, 2.1$  Hz, 2H), 7.16 (d,  $J = 8.1$  Hz, 2H), 4.91 (dd,  $J = 10.5, 4.8$  Hz, 1H), 4.69–4.55 (m, 2H), 2.84 (dd,  $J = 10.1, 4.4$  Hz, 1H), 2.34 (d,  $J = 1.7$  Hz, 3H), 1.29–1.27 (m, 9H), 1.25 (d,  $J = 6.2$  Hz, 3H), 1.13 (d,  $J = 6.2$  Hz, 3H).  $^{13}\text{C}$  NMR (100.61 MHz,  $\text{CDCl}_3$ )  $\delta$  137.44 (d,  $J = 3.2$  Hz), 134.08 (d,  $J = 1.8$  Hz), 128.76 (d,  $J = 2.4$  Hz), 127.32 (d,  $J = 6.0$  Hz), 71.88 (d,  $J = 7.3$  Hz), 71.52 (d,  $J = 7.6$  Hz), 70.93 (d,  $J = 161.4$  Hz), 24.24 (d,  $J = 3.1$  Hz), 24.11 (d,  $J = 3.6$  Hz), 23.94 (d,  $J = 5.0$  Hz), 23.62 (d,  $J = 5.5$  Hz), 21.23 (d,  $J = 0.9$  Hz).  $^{31}\text{P}$  ( $\text{CDCl}_3$ , 161.97 MHz)  $\delta$  (ppm) = 19.98 (s).

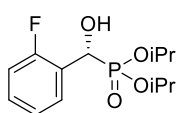

**Diisopropyl (R)-(hydroxy(2-fluorophenyl)methyl)phosphonate (4i):** Yield = 81%;

$[\alpha]^{24}_{\text{D}} = +14.0$  (c 1.14  $\text{CHCl}_3$ ). HPLC analysis: Chiralpak IC column, Hexane/*i*-PrOH 90:10, 1 mL/min,  $\lambda = 195$  nm,  $t_{\text{R}} = 9.11$  min (*R*, major),  $t_{\text{R}} = 12.15$  min (*S*, minor); e.r. = 66.5:33.5.  $^1\text{H}$  NMR (400.13 MHz,  $\text{CDCl}_3$ )  $\delta$  7.71–7.67 (m, 1H), 7.29–7.24 (m, 1H), 7.18–

7.14 (m, 1H), 7.04–6.99 (m, 1H), 5.32 (d,  $J = 11.6$  Hz, 1H), 4.76–4.58 (m, 3H), 1.33 (d,  $J = 6.2$  Hz, 3H), 1.28–1.24 (m, 6H), 1.14 (d,  $J = 6.2$  Hz, 3H).  $^{13}\text{C}$  NMR (100.61 MHz,  $\text{CDCl}_3$ )  $\delta$  159.91 (dd,  $J = 247.0, 6.9$  Hz), 129.46 (dd,  $J = 8.2, 3.1$  Hz), 129.26 (dd,  $J_{\text{CF}} = J_{\text{CP}} = 3.7$  Hz), 125.02 (d,  $J = 13.7$  Hz), 124.17 (dd,  $J_{\text{CF}} = J_{\text{CP}} = 3.1$  Hz), 114.96 (dd,  $J = 22.1, 2.2$  Hz), 72.35 (d,  $J = 7.5$  Hz), 71.93 (d,  $J = 7.6$  Hz), 64.12 (dd,  $J = 165.1, 3.2$  Hz), 24.29 (d,  $J = 3.1$  Hz), 24.10 (d,  $J = 3.6$  Hz), 23.92 (d,  $J = 5.0$  Hz), 23.55 (d,  $J = 5.6$  Hz).  $^{31}\text{P}$  ( $\text{CDCl}_3$ , 161.97 MHz)  $\delta$  (ppm) = 19.22 (d,  $J = 6.6$  Hz). HRMS (ESI,  $\text{M}+\text{H}^+$ )  $m/z$  calcd for  $\text{C}_{13}\text{H}_{21}\text{O}_4\text{FP}$ : 291.1161, found 291.1152.

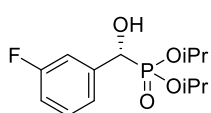

**Diisopropyl (R)-(hydroxy(3-fluorophenyl)methyl)phosphonate (4j):** Yield = 93%;

$[\alpha]^{24}_{\text{D}} = +19.3$  (c 1.24,  $\text{CHCl}_3$ ). HPLC analysis: Chiralpak IC column, Hexane/*i*-PrOH 90:10, 1 mL/min,  $\lambda = 195$  nm,  $t_{\text{R}} = 7.60$  min (*S*, minor),  $t_{\text{R}} = 8.37$  min (*R*, major); e.r. = 81:19.  $^1\text{H}$  NMR (400.13 MHz,  $\text{CDCl}_3$ )  $\delta$  7.32–7.23 (m, 3H), 7.00–6.95 (m, 1H), 4.96

(d,  $J = 8.6$  Hz, 1H), 4.70–4.61 (m, 2H), 4.22 (brs, 1H), 1.28–1.26 (m, 9H), 1.18 (d,  $J = 6.2$  Hz, 3H).  $^{13}\text{C}$  NMR (100.61 MHz,  $\text{CDCl}_3$ )  $\delta$  162.79 (dd,  $J = 245.3, 2.9$  Hz), 139.72 (d,  $J = 7.4$  Hz), 129.55 (dd,  $J = 8.1, 2.5$  Hz), 122.95 (dd,  $J = 5.7, 2.9$  Hz), 114.73 (dd,  $J = 21.2, 3.1$  Hz), 114.29 (dd,  $J = 22.8, 5.4$  Hz), 72.37 (d,  $J = 7.4$  Hz), 72.00 (d,  $J = 7.7$  Hz), 70.61 (dd,  $J = 160.3, 1.8$  Hz), 24.26 (d,  $J = 3.2$  Hz), 24.11 (d,  $J = 3.7$  Hz), 23.99 (d,  $J = 5.0$  Hz), 23.71 (d,  $J = 5.4$  Hz).  $^{31}\text{P}$  ( $\text{CDCl}_3$ , 161.97 MHz)  $\delta$  (ppm) = 19.07 (s). HRMS (ESI,  $\text{M}+\text{H}^+$ )  $m/z$  calcd for  $\text{C}_{13}\text{H}_{21}\text{O}_4\text{FP}$ : 291.1161, found 291.1152.

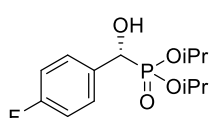

**Diisopropyl (R)-(hydroxy(4-fluorophenyl)methyl)phosphonate (4k):** Yield = 95%;

$[\alpha]^{24}_{\text{D}} = +25.6$  (c 1.09,  $\text{CHCl}_3$ ) [lit $^2$   $[\alpha]^{22}_{\text{D}} = -80.0$  (c 0.80,  $\text{CHCl}_3$ ) for 40% ee (*S*)]. HPLC analysis: Chiralpak IC column, Hexane/*i*-PrOH 90:10, 1 mL/min,  $\lambda = 195$  nm,  $t_{\text{R}} = 8.54$  min (*R*, major),  $t_{\text{R}} = 9.65$  min (*S*, minor); e.r. = 89:11.  $^1\text{H}$  NMR (400.13 MHz,

$\text{CDCl}_3$ )  $\delta$  7.48–7.44 (m, 2H), 7.02 (t,  $J = 8.5$  Hz, 2H), 4.93 (dd,  $J = 10.4, 5.2$  Hz, 1H), 4.69–4.57 (m, 2H), 4.38 (dd,  $J = 7.7, 5.4$  Hz, 1H), 1.27–1.24 (m, 9H), 1.16 (d,  $J = 6.2$  Hz, 3H).  $^{13}\text{C}$  NMR (100.61 MHz,  $\text{CDCl}_3$ )  $\delta$  162.47 (dd,  $J = 245.8, 3.4$  Hz), 133.09 (dd,  $J = 3.0, 1.8$  Hz), 129.09 (dd,  $J = 8.1, 5.9$  Hz, two carbons), 114.91 (dd,  $J = 21.5, 2.4$  Hz, two carbons), 72.11 (d,  $J = 7.4$  Hz), 71.70 (d,  $J = 7.7$  Hz), 70.35 (d,  $J = 162.5$  Hz), 24.19 (d,  $J = 3.2$  Hz), 24.04 (d,  $J = 3.7$  Hz), 23.96 (d,  $J = 4.9$  Hz), 23.65 (d,  $J = 5.4$  Hz).  $^{31}\text{P}$  ( $\text{CDCl}_3$ , 161.97 MHz)  $\delta$  (ppm) = 19.50 (d,  $J = 4.9$  Hz). HRMS (ESI,  $\text{M}+\text{H}^+$ )  $m/z$  calcd for  $\text{C}_{13}\text{H}_{21}\text{O}_4\text{FP}$ : 291.1161, found 291.1150.

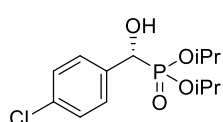

**Diisopropyl (R)-(hydroxy(4-chlorophenyl)methyl)phosphonate (4l):** Yield = 93%;

$[\alpha]^{24}_{\text{D}} = +20.8$  (c 1.15,  $\text{CHCl}_3$ ). HPLC analysis: Chiralpak AS-H column, Hexane/*i*-PrOH 90:10, 1 mL/min,  $\lambda = 195$  nm,  $t_{\text{R}} = 6.66$  min (*R*, major),  $t_{\text{R}} = 8.41$  min (*S*, minor); e.r. = 86:14.  $^1\text{H}$  NMR (400.13 MHz,  $\text{CDCl}_3$ )  $\delta$  7.42 (dd,  $J = 8.6, 2.1$  Hz, 2H), 7.32 (d,  $J = 8.5$  Hz, 2H), 4.94 (d,  $J = 10.7$  Hz, 1H), 4.70–4.57 (m, 1H), 3.77 (brs, 1H, OH), 1.28–1.25 (m, 9H), 1.18

(d,  $J = 6.2$  Hz, 3H).  $^{13}\text{C}$  NMR (100.61 MHz,  $\text{CDCl}_3$ )  $\delta$  135.62 (d,  $J = 2.3$  Hz), 133.72 (d,  $J = 3.8$  Hz), 128.66 (d,  $J = 5.7$  Hz, two carbon), 128.33 (d,  $J = 2.6$  Hz, two carbon), 72.28 (d,  $J = 7.4$  Hz), 71.93 (d,  $J = 7.7$  Hz),

70.51 (d,  $J = 160.8$  Hz), 24.26 (d,  $J = 3.3$  Hz), 24.12 (d,  $J = 3.7$  Hz), 24.03 (d,  $J = 5.0$  Hz), 23.78 (d,  $J = 5.4$  Hz).  $^{31}\text{P}$  ( $\text{CDCl}_3$ , 161.97 MHz)  $\delta$  (ppm) = 19.11 (s). HRMS (ESI,  $\text{M}+\text{H}^+$ )  $m/z$  calcd for  $\text{C}_{13}\text{H}_{21}\text{O}_4\text{P}$ : 307.0866, found 307.0865.

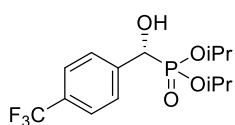

**Diisopropyl (R)-(hydroxy(4-(trifluoromethyl)phenyl)methyl)phosphonate (4m):**

Yield = 91%;  $[\alpha]^{24}_{\text{D}} = +11.4$  (c 1.05,  $\text{CHCl}_3$ ). HPLC analysis: Chiralpak IC column, Hexane/*i*-PrOH 90:10, 1 mL/min,  $\lambda = 195$  nm,  $t_{\text{R}} = 7.86$  min (*S*, minor),  $t_{\text{R}} = 8.79$  min (*R*, major); e.r. = 72:28.  $^1\text{H}$  NMR (400.13 MHz,  $\text{CDCl}_3$ )  $\delta$  7.61 (s, 4H), 5.04 (dd,  $J = 11.5, 4.6$  Hz, 1H), 4.74–4.59 (m, 2H), 3.77 (m, 1H, OH), 1.29–1.25 (m, 9H), 1.20 (d,  $J = 6.2$  Hz, 3H).  $^{13}\text{C}$  NMR (100.61 MHz,  $\text{CDCl}_3$ )  $\delta$  141.43, 129.89 (qd,  $J = 32.4, 3.4$  Hz), 127.55 (d,  $J = 5.4$  Hz), 125.17–124.61 (m, two carbons), 124.29 (q,  $J = 273.1$  Hz), 72.51 (d,  $J = 7.4$  Hz), 72.05 (d,  $J = 7.8$  Hz), 70.56 (d,  $J = 160.6$  Hz), 24.20 (d,  $J = 3.2$  Hz), 24.03 (d,  $J = 3.6$  Hz), 24.01 (d,  $J = 4.9$  Hz), 23.70 (d,  $J = 5.4$  Hz).  $^{31}\text{P}$  ( $\text{CDCl}_3$ , 161.97 MHz)  $\delta$  (ppm) = 18.71 (d,  $J = 2.4$  Hz). HRMS (ESI,  $\text{M}+\text{H}^+$ )  $m/z$  calcd for  $\text{C}_{14}\text{H}_{21}\text{O}_4\text{PF}_3$ : 341.1130, found 341.1127.

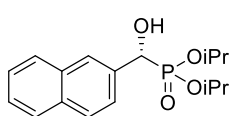

**Diisopropyl (R)-(hydroxy(naphthalen-2-yl)methyl)phosphonate (4n):**

Yield = 95%;  $[\alpha]^{24}_{\text{D}} = +19.0$  (c = 1.05,  $\text{CHCl}_3$ ). HPLC analysis: Chiralpak IC column, Hexane/*i*-PrOH 90:10, 1 mL/min,  $\lambda = 195$  nm,  $t_{\text{R}} = 13.76$  min (*R*, major),  $t_{\text{R}} = 15.67$  min (*S*, minor); e.r. = 88.5:11.5.  $^1\text{H}$  NMR (400.13 MHz,  $\text{CDCl}_3$ )  $\delta$  7.96 (brs, 1H), 7.84–7.82 (m, 2H), 7.61 (dt,  $J = 8.6, 1.5$  Hz, 1H), 7.49–7.46 (m, 2H), 5.14 (d,  $J = 10.7$  Hz, 1H), 4.70–4.57 (m, 2H), 3.51 (brs, 1H, OH), 1.28 (d,  $J = 6.2$  Hz, 3H), 1.27 (d,  $J = 6.2$  Hz, 3H), 1.24 (d,  $J = 6.2$  Hz, 3H), 1.13 (d,  $J = 6.2$  Hz, 3H).  $^{13}\text{C}$  NMR (100.61 MHz,  $\text{CDCl}_3$ )  $\delta$  134.80 (d,  $J = 2.2$  Hz), 133.15 (d,  $J = 2.5$  Hz), 133.06 (d,  $J = 2.2$  Hz), 128.11 (d,  $J = 1.2$  Hz), 127.67 (d,  $J = 1.3$  Hz), 127.57 (d,  $J = 2.0$  Hz), 126.31 (d,  $J = 7.6$  Hz), 125.99 (s), 125.92 (d,  $J = 1.1$  Hz), 125.43 (d,  $J = 4.3$  Hz), 72.05 (d,  $J = 7.4$  Hz), 71.71 (d,  $J = 7.7$  Hz), 71.17 (d,  $J = 161.2$  Hz), 24.21 (d,  $J = 3.1$  Hz), 24.08 (d,  $J = 3.6$  Hz), 23.96 (d,  $J = 5.0$  Hz), 23.67 (d,  $J = 5.5$  Hz).  $^{31}\text{P}$  ( $\text{CDCl}_3$ , 161.97 MHz)  $\delta$  (ppm) = 19.71 (s). HRMS (ESI,  $\text{M}+\text{H}^+$ )  $m/z$  calcd for  $\text{C}_{17}\text{H}_{24}\text{O}_4\text{P}$ : 323.1412, found 323.1411.

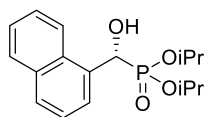

**Diisopropyl (R)-(hydroxy(naphthalen-1-yl)methyl)phosphonate (4o):**

Yield = 78%;  $[\alpha]^{24}_{\text{D}} = +37.3$  (c 1.07,  $\text{CHCl}_3$ ). HPLC analysis: Chiralpak IC column, Hexane/*i*-PrOH 90:10, 1 mL/min,  $\lambda = 195$  nm,  $t_{\text{R}} = 18.78$  min (*S*, minor),  $t_{\text{R}} = 20.78$  min (*R*, major); e.r. = 67.5:32.5.  $^1\text{H}$  NMR (400.13 MHz,  $\text{CDCl}_3$ )  $\delta$  8.09 (d,  $J = 8.3$  Hz, 1H), 7.90–7.80 (m, 3H), 7.53–7.45 (m, 3H), 5.80 (dd,  $J = 11.8, 3.2$  Hz, 1H), 4.69–4.60 (m, 1H), 4.58–4.47 (m, 1H), 4.08 (brs, 1H, OH), 1.26 (d,  $J = 6.2$  Hz, 3H), 1.19 (d,  $J = 6.1$  Hz, 3H), 1.18 (d,  $J = 6.1$  Hz, 3H), 0.87 (d,  $J = 6.2$  Hz, 3H).  $^{13}\text{C}$  NMR (100.61 MHz,  $\text{CDCl}_3$ )  $\delta$  133.57 (d,  $J = 1.3$  Hz), 133.54 (d,  $J = 1.8$  Hz), 131.11 (d,  $J = 6.1$  Hz), 128.55 (s), 128.41 (d,  $J = 3.4$  Hz), 125.72 (s), 125.66 (d,  $J = 6.1$  Hz), 125.46 (s), 125.32 (d,  $J = 3.4$  Hz), 124.19 (s), 124.19 (s), 72.21 (d,  $J = 7.5$  Hz), 71.70 (d,  $J = 7.8$  Hz), 67.26 (d,  $J = 163.5$  Hz), 24.24 (d,  $J = 3.0$  Hz), 23.97 (d,  $J = 4.9$  Hz), 23.92 (d,  $J = 6.5$  Hz), 23.26 (d,  $J = 5.6$  Hz).  $^{31}\text{P}$  ( $\text{CDCl}_3$ , 161.97 MHz)  $\delta$  (ppm) = 20.21 (s). HRMS (ESI,  $\text{M}+\text{H}^+$ )  $m/z$  calcd for  $\text{C}_{17}\text{H}_{24}\text{O}_4\text{P}$ : 323.1412, found 323.1411.

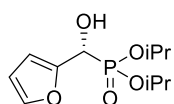

**Diisopropyl (R)-(furan-2-yl(hydroxy)methyl)phosphonate (4p):**

Yield = 96%;  $[\alpha]^{24}_{\text{D}} = +12.16$  (c 1.03,  $\text{CHCl}_3$ ). HPLC analysis: Chiralpak AS-H column, Hexane/*i*-PrOH 90:10, 1 mL/min,  $\lambda = 195$  nm,  $t_{\text{R}} = 8.10$  min (*R*, major),  $t_{\text{R}} = 9.20$  min (*S*, minor); e.r. = 66:34.  $^1\text{H}$  NMR (400.13 MHz,  $\text{CDCl}_3$ )  $\delta$  7.44 (d,  $J = 0.8$  Hz, 1H), 6.53 (t,  $J = 2.9$  Hz, 1H), 6.40 (dd,  $J = 3.1, 1.9$  Hz, 1H), 4.95 (d,  $J = 13.4$  Hz, 1H), 4.83–4.64 (m, 2H), 1.37–1.32 (m, 9H), 1.20 (d,  $J = 6.2$  Hz, 3H).  $^{13}\text{C}$  NMR (100.61 MHz,  $\text{CDCl}_3$ )  $\delta$  150.74 (d,  $J = 2.5$  Hz), 142.36 (d,  $J = 2.5$  Hz), 110.65 (d,  $J = 1.9$  Hz), 109.09 (d,  $J = 5.8$  Hz), 72.30 (d,  $J = 7.2$  Hz), 71.88 (d,  $J = 7.3$  Hz), 64.94 (d,  $J = 168.7$  Hz), 24.23 (d,  $J = 3.0$  Hz), 24.08 (d,  $J = 3.6$  Hz), 23.88 (d,  $J = 4.9$  Hz), 23.56 (d,  $J = 5.4$  Hz).  $^{31}\text{P}$  ( $\text{CDCl}_3$ , 161.97 MHz)  $\delta$  (ppm) = 17.56 (s). HRMS (ESI,  $\text{M}+\text{H}^+$ )  $m/z$  calcd for  $\text{C}_{11}\text{H}_{20}\text{O}_5\text{P}$ : 263.1048, found 263.1048.



#### IV. <sup>1</sup>H and <sup>13</sup>C NMR Spectra of phosphorylation products 4a-p

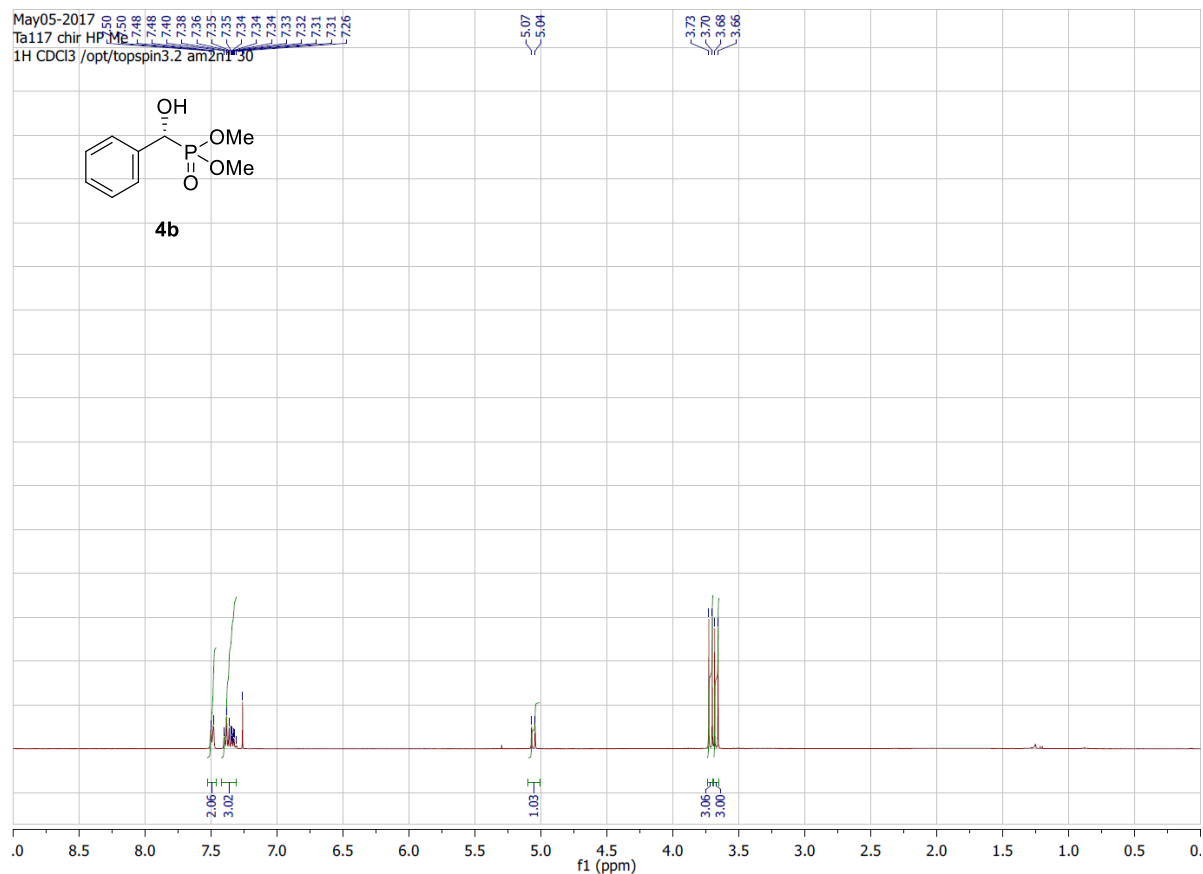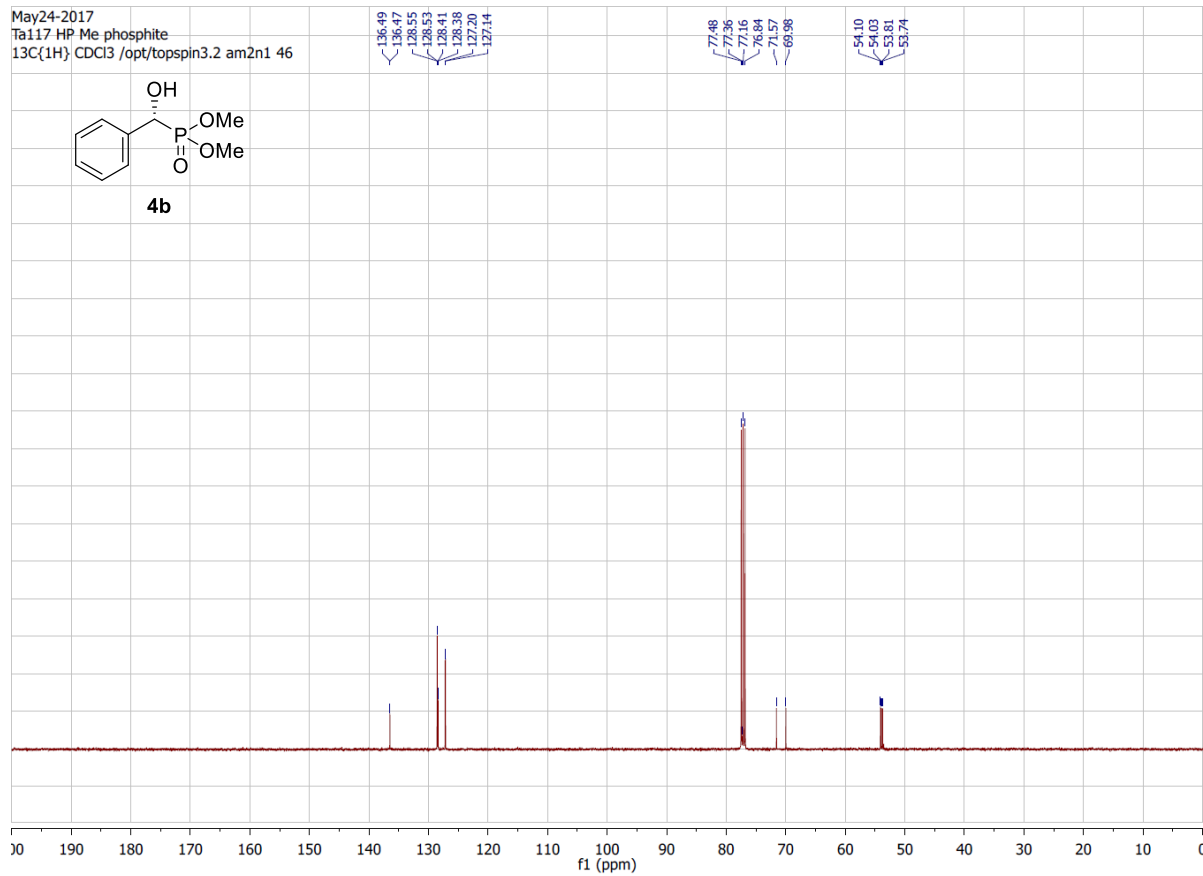

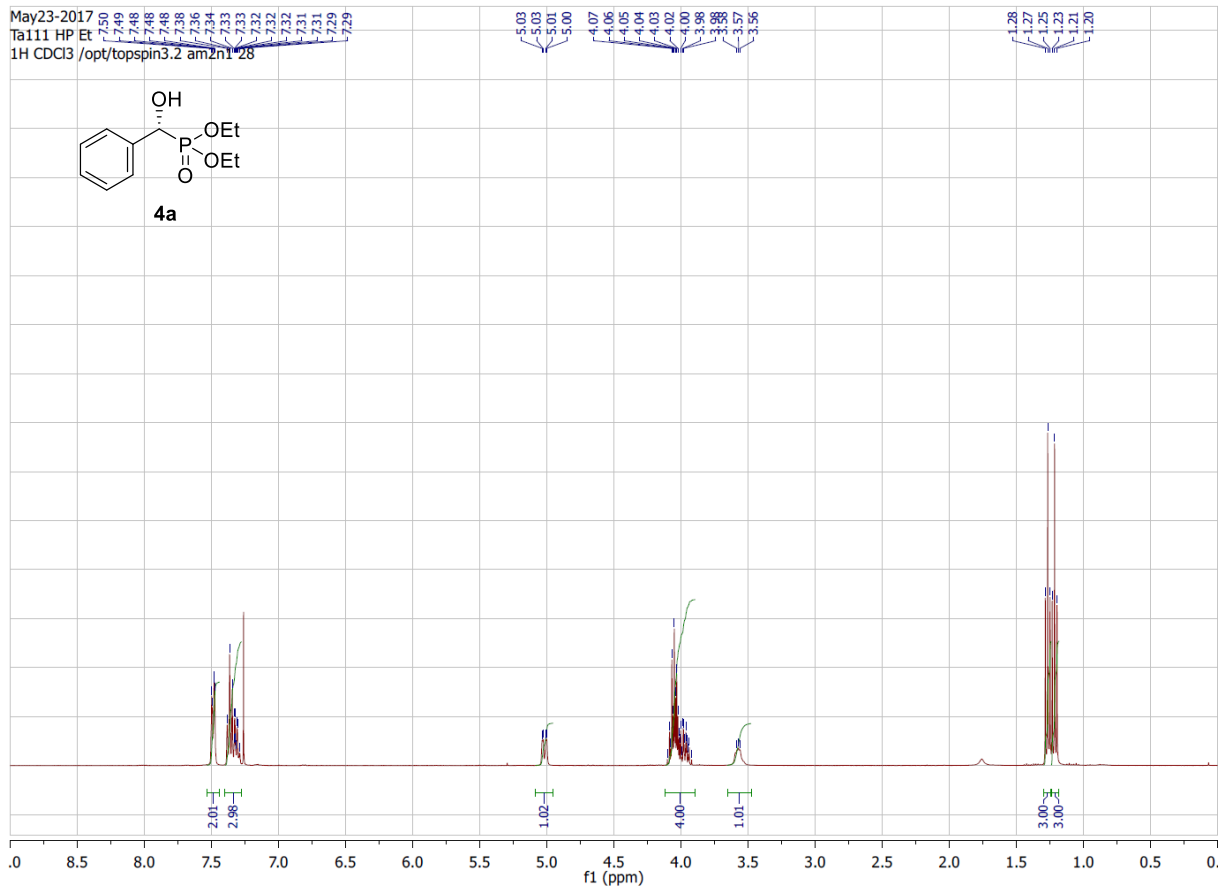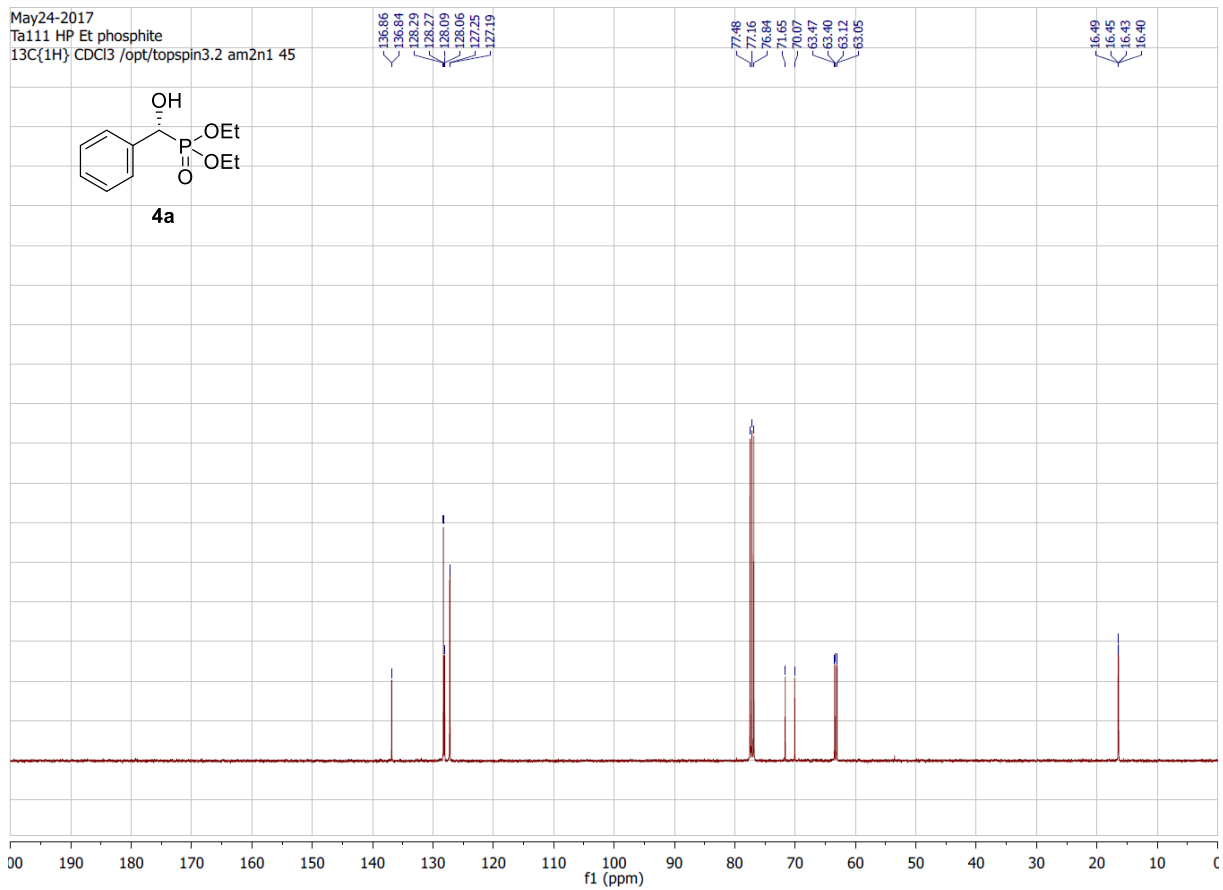



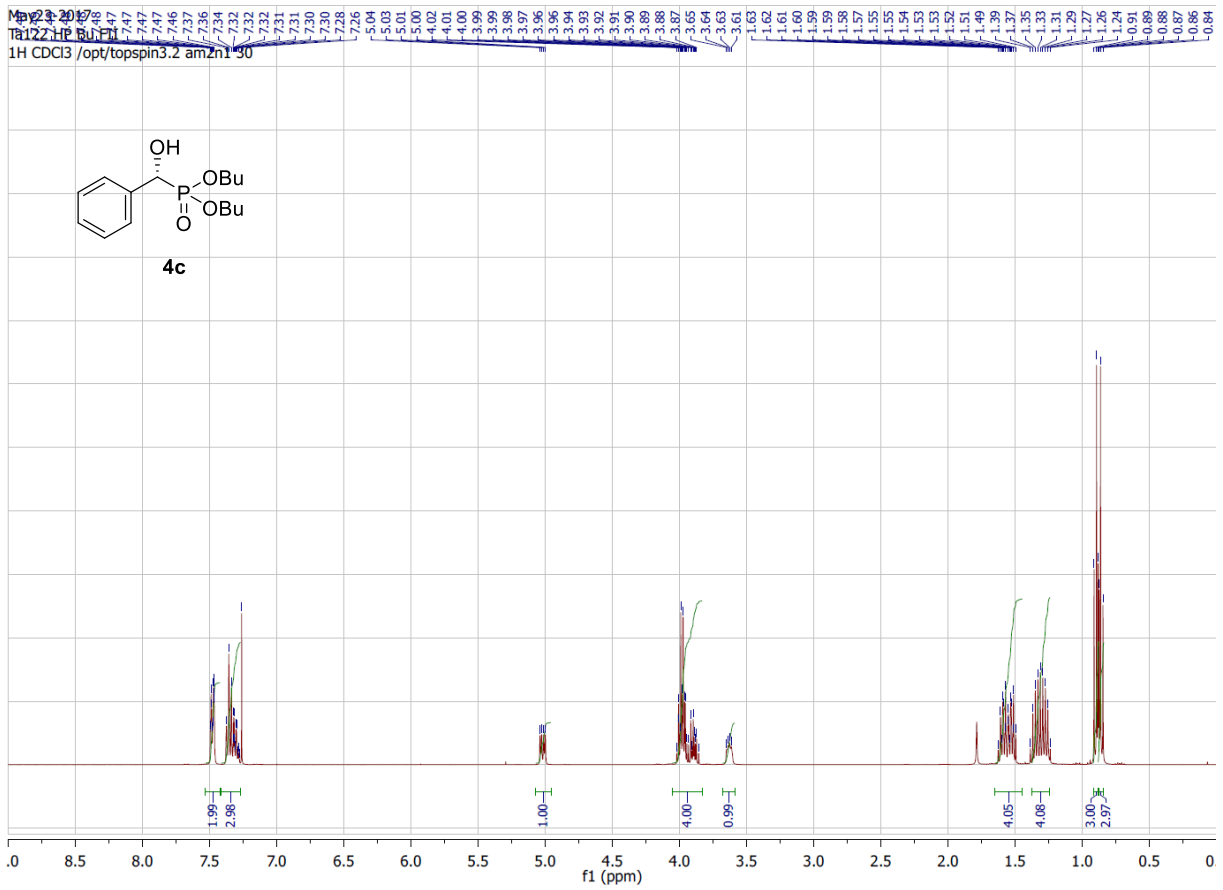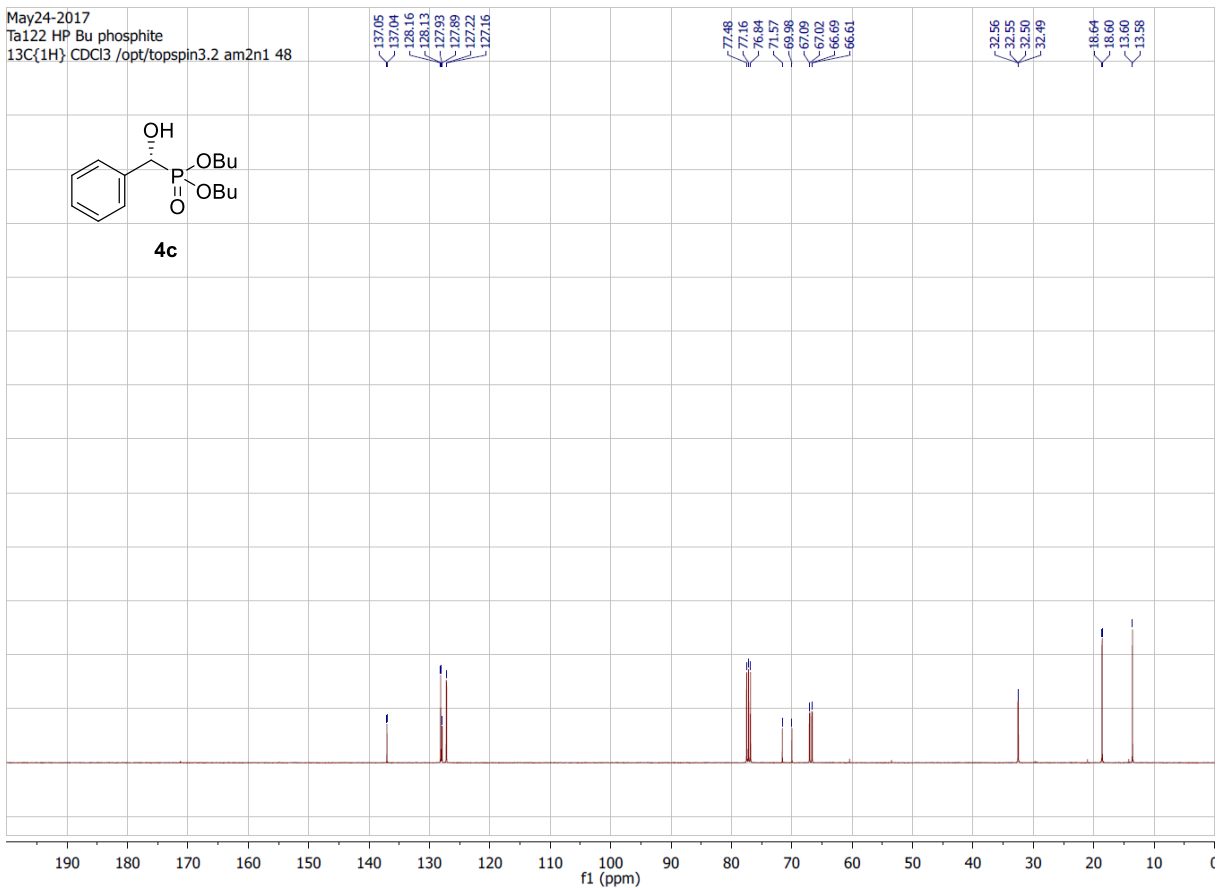

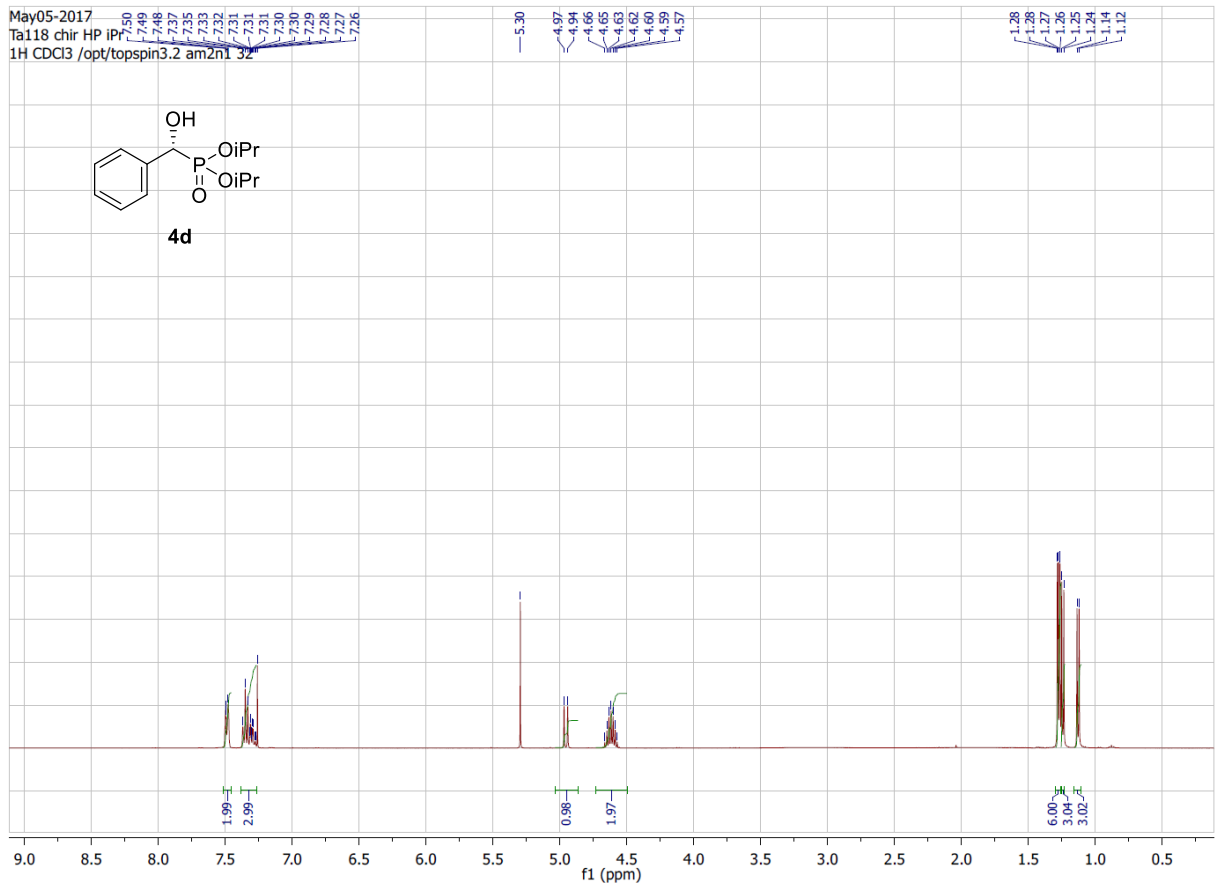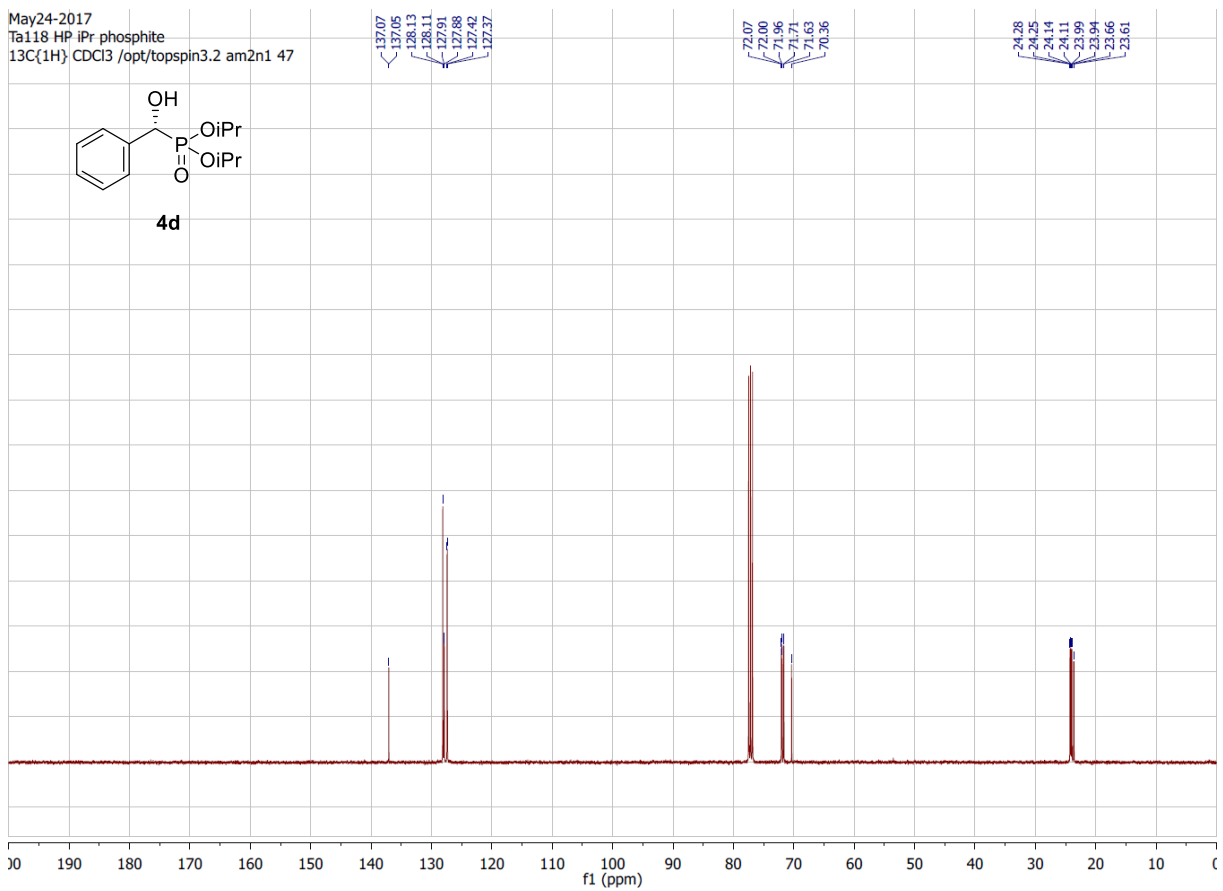

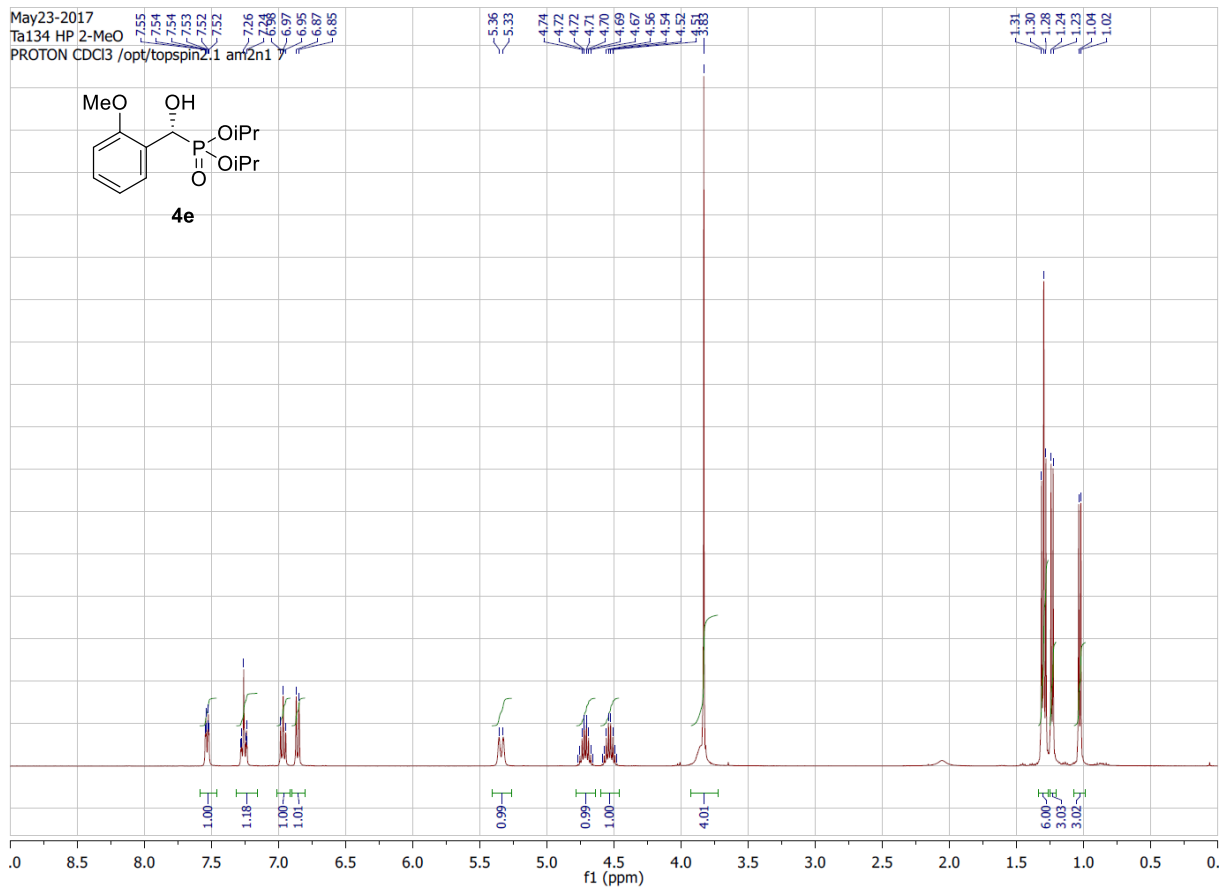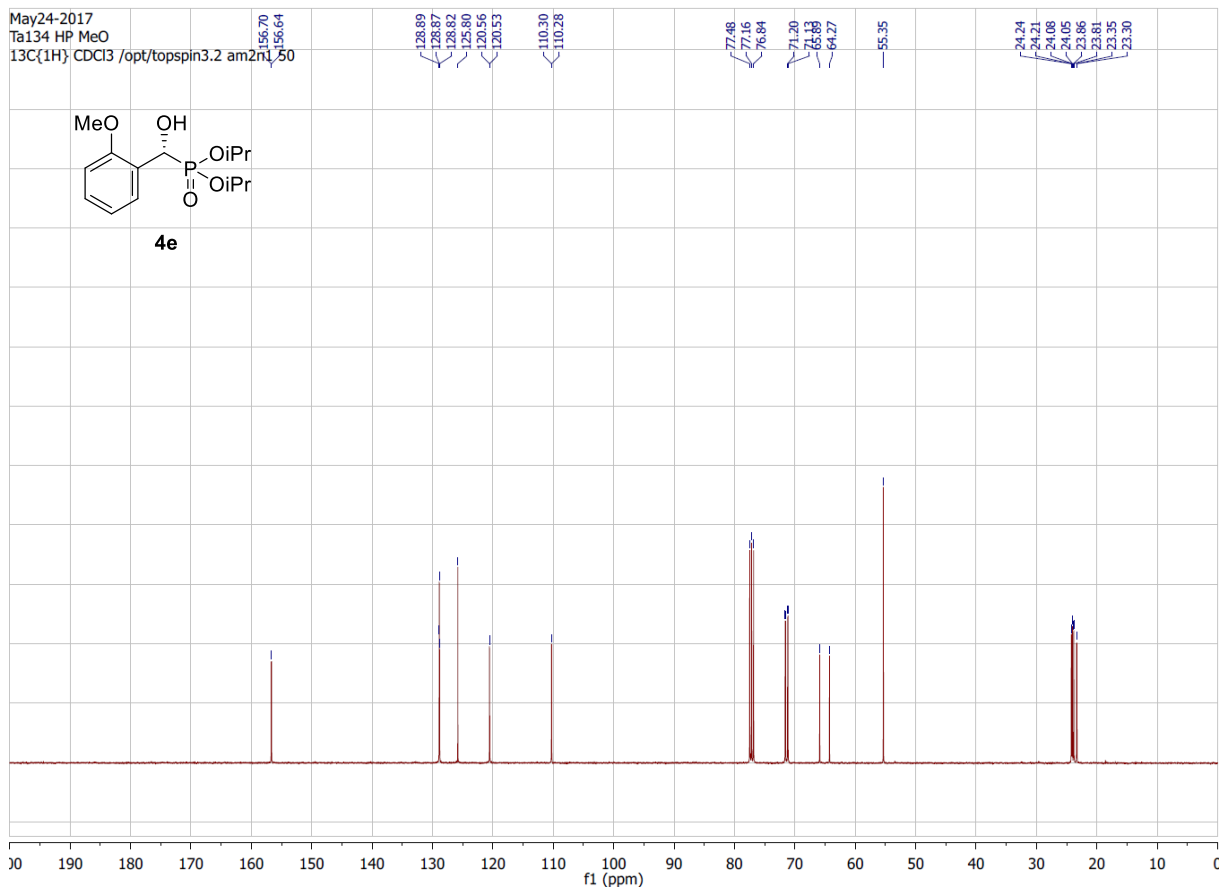

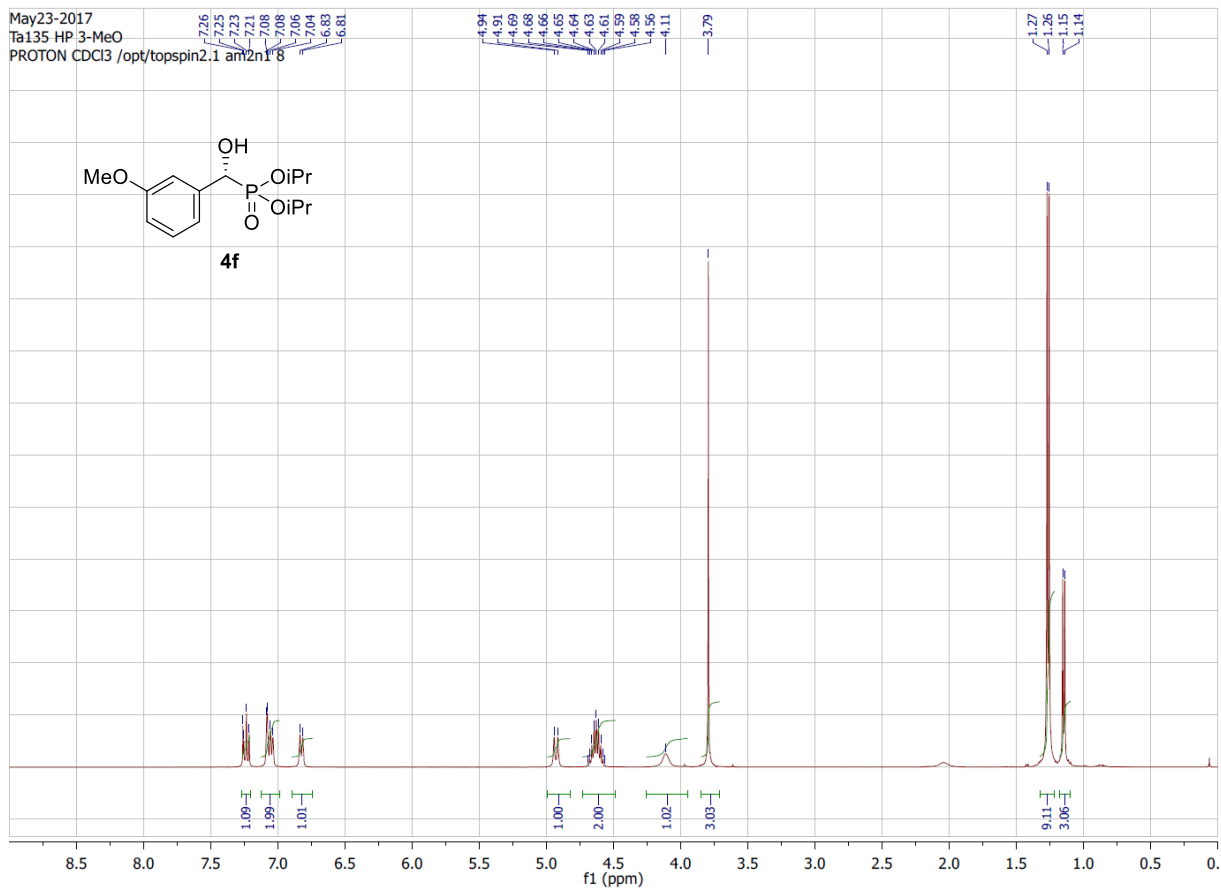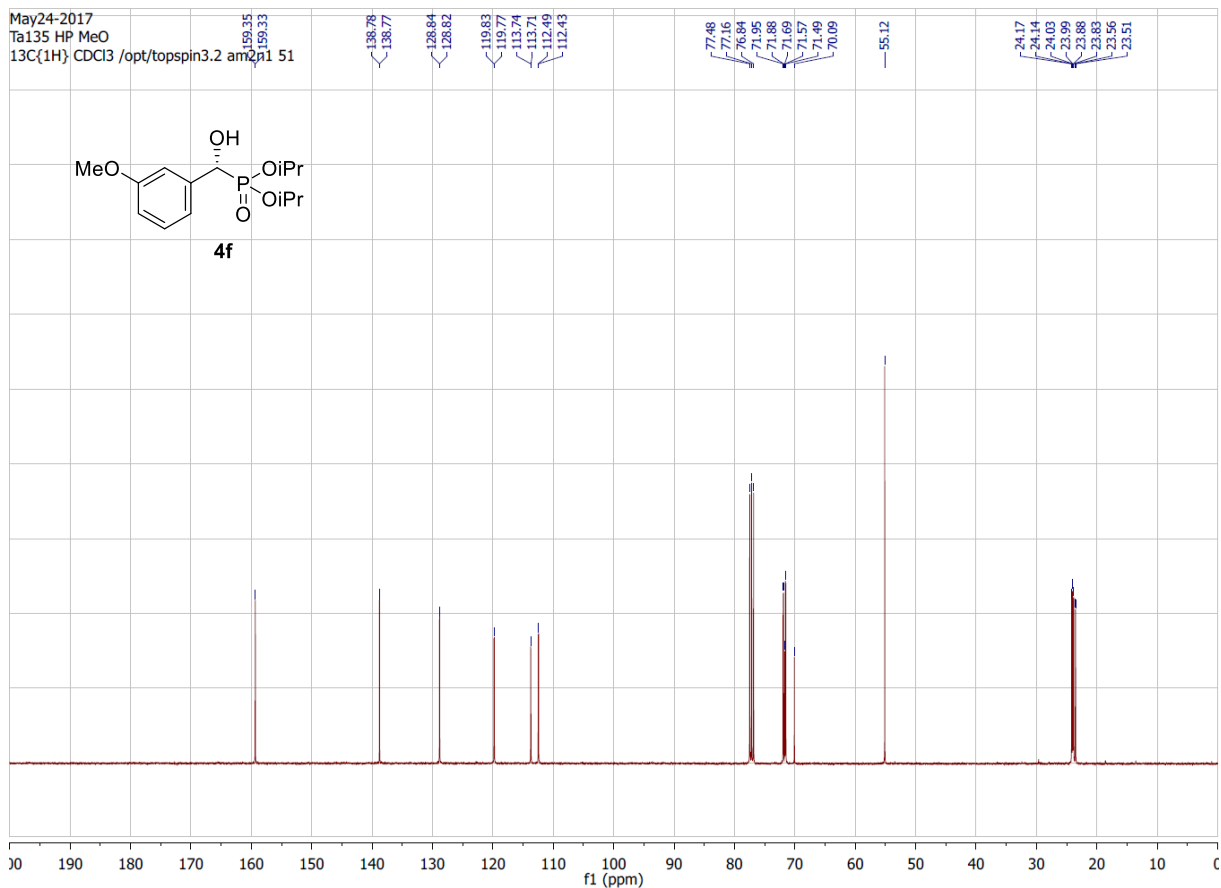

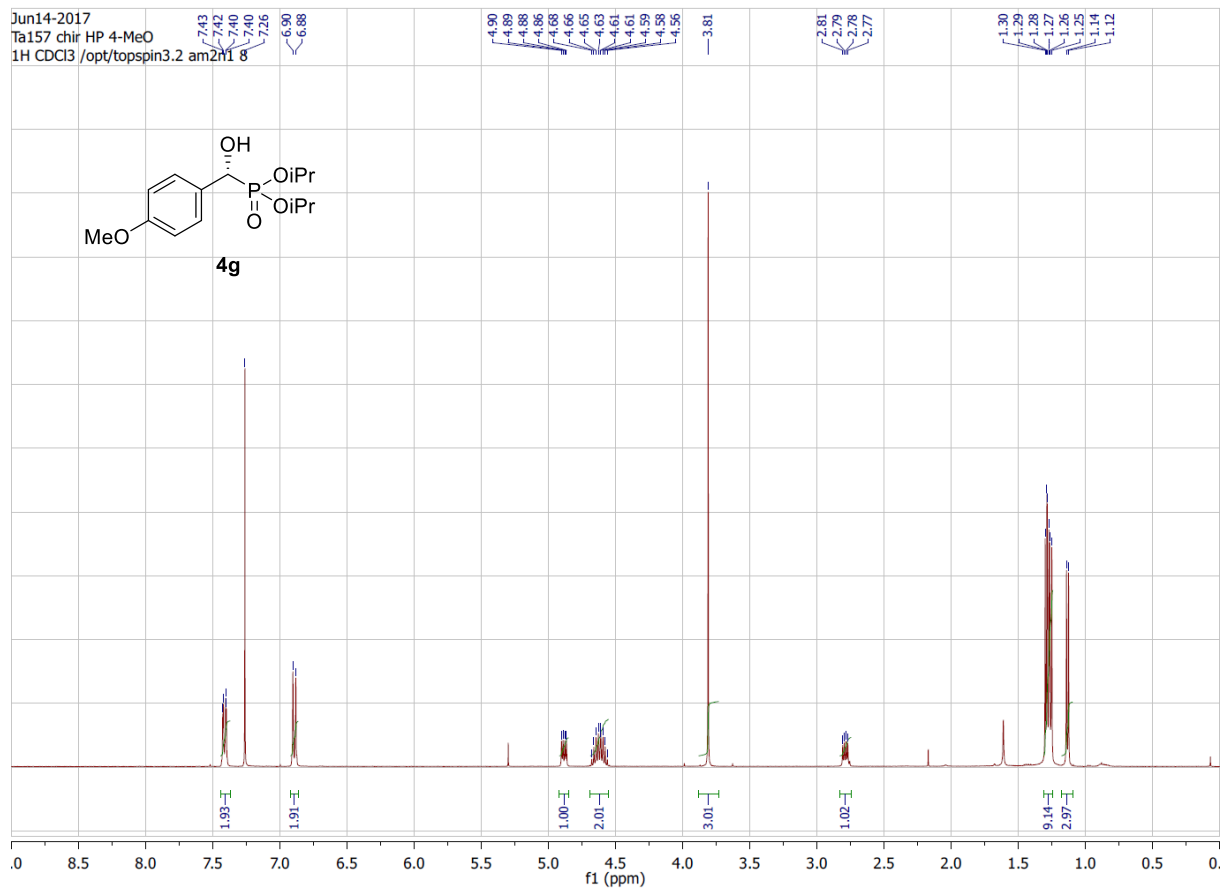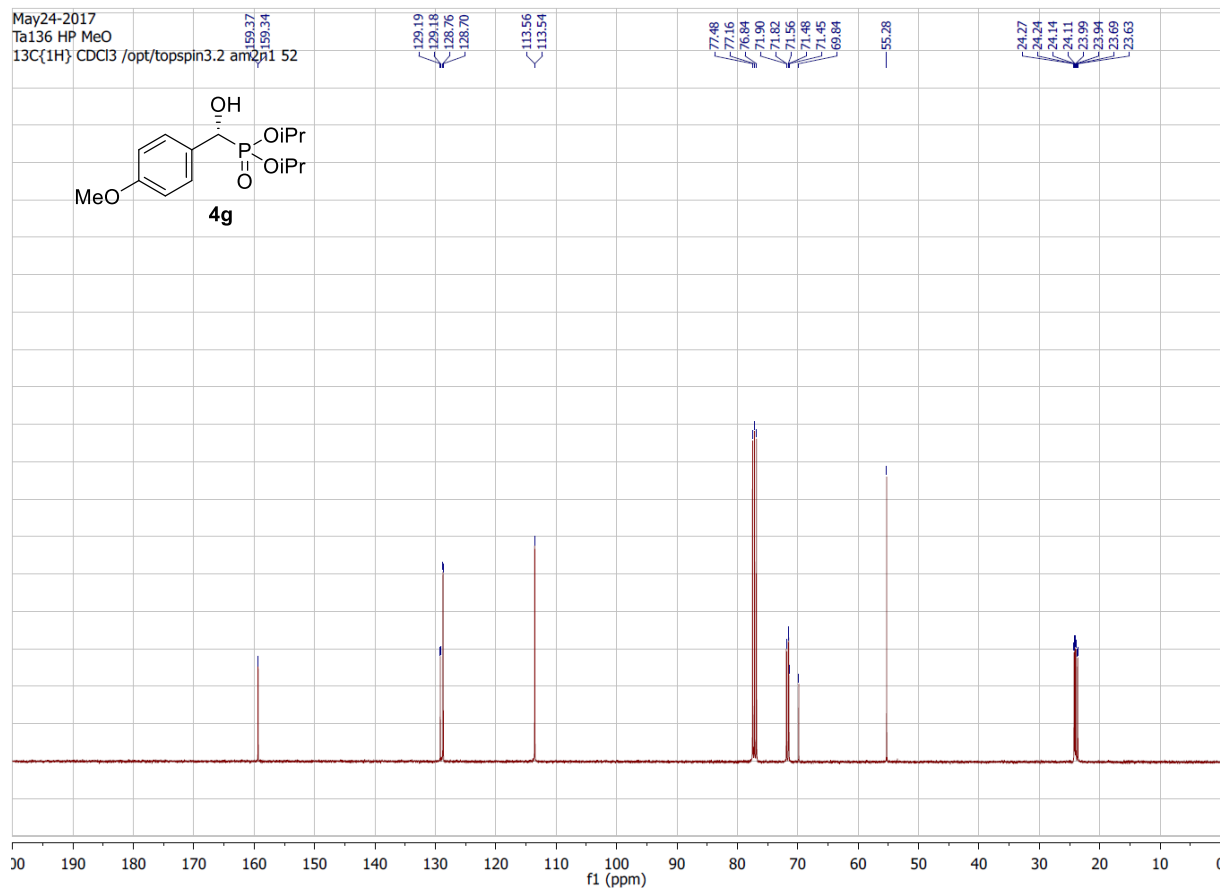

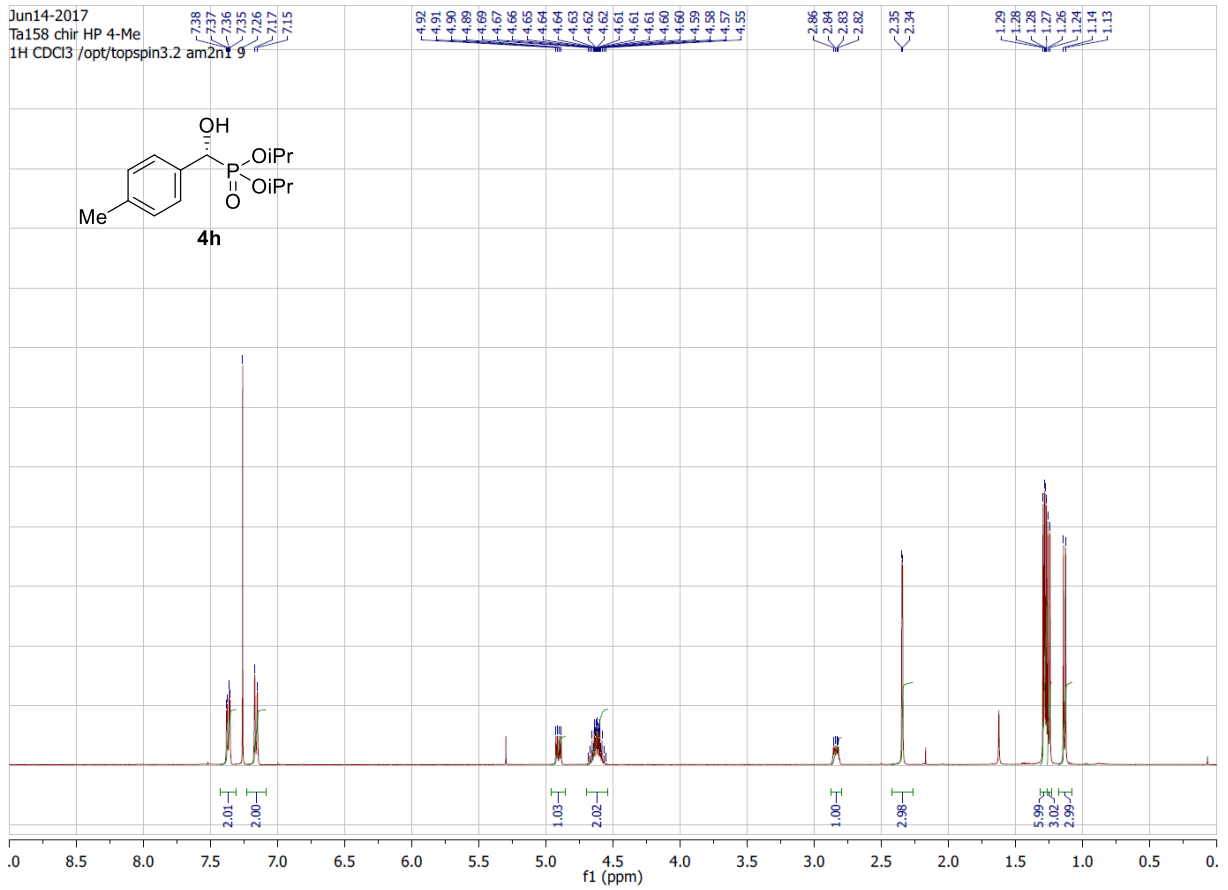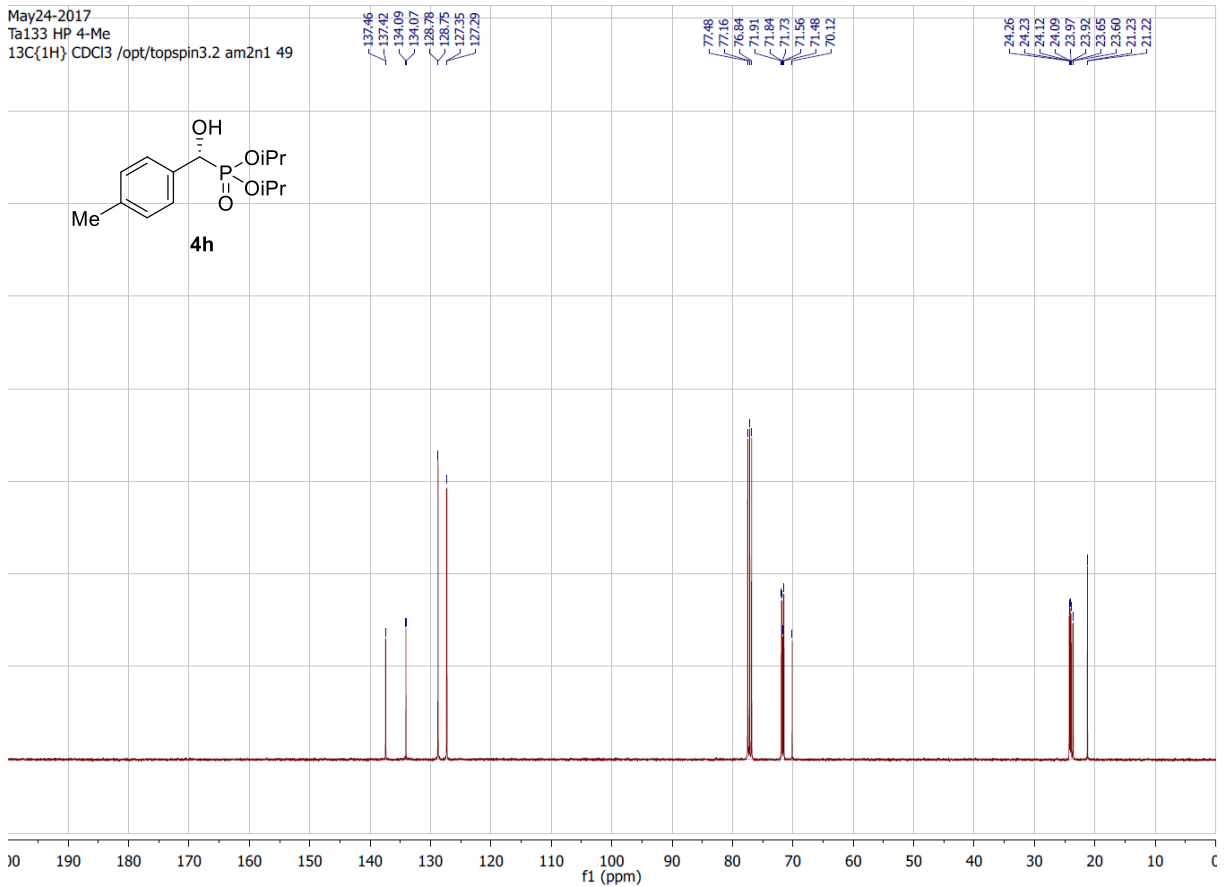

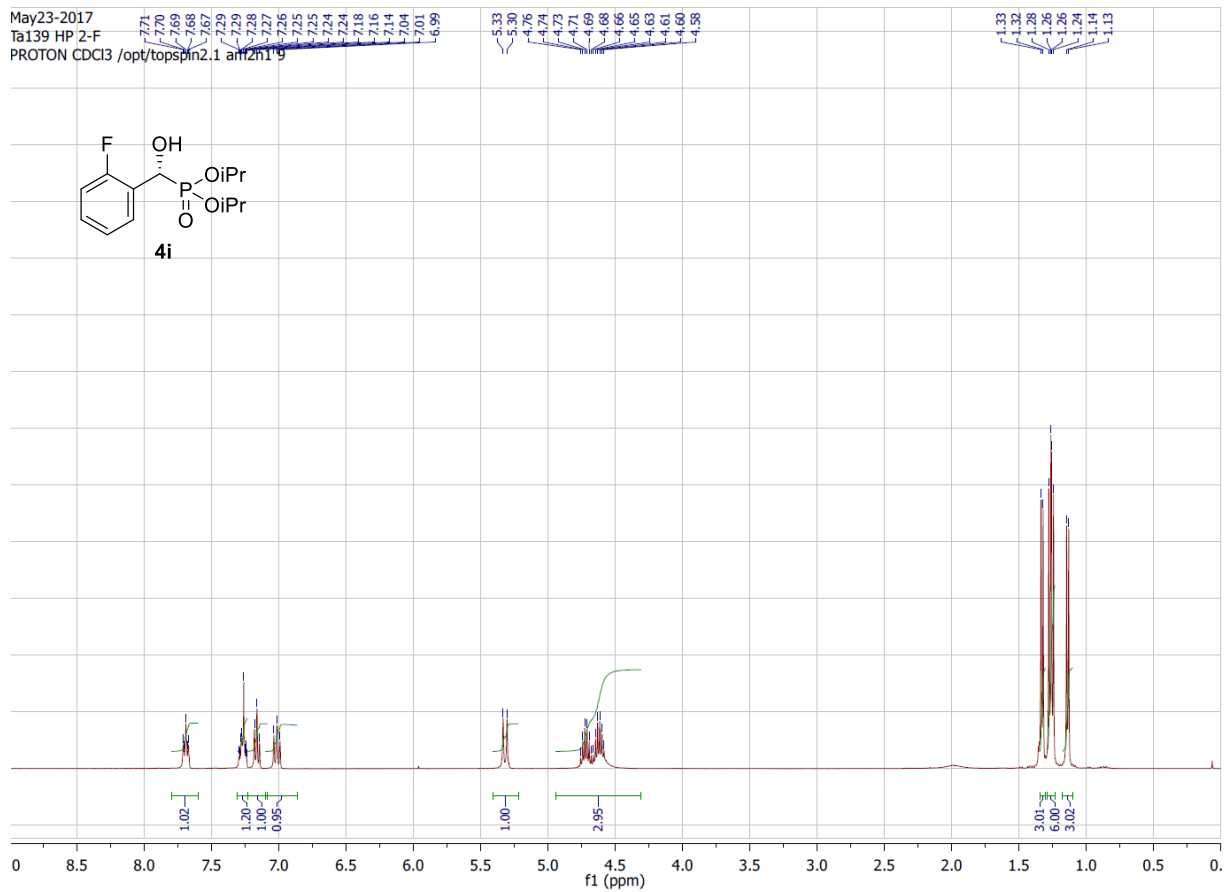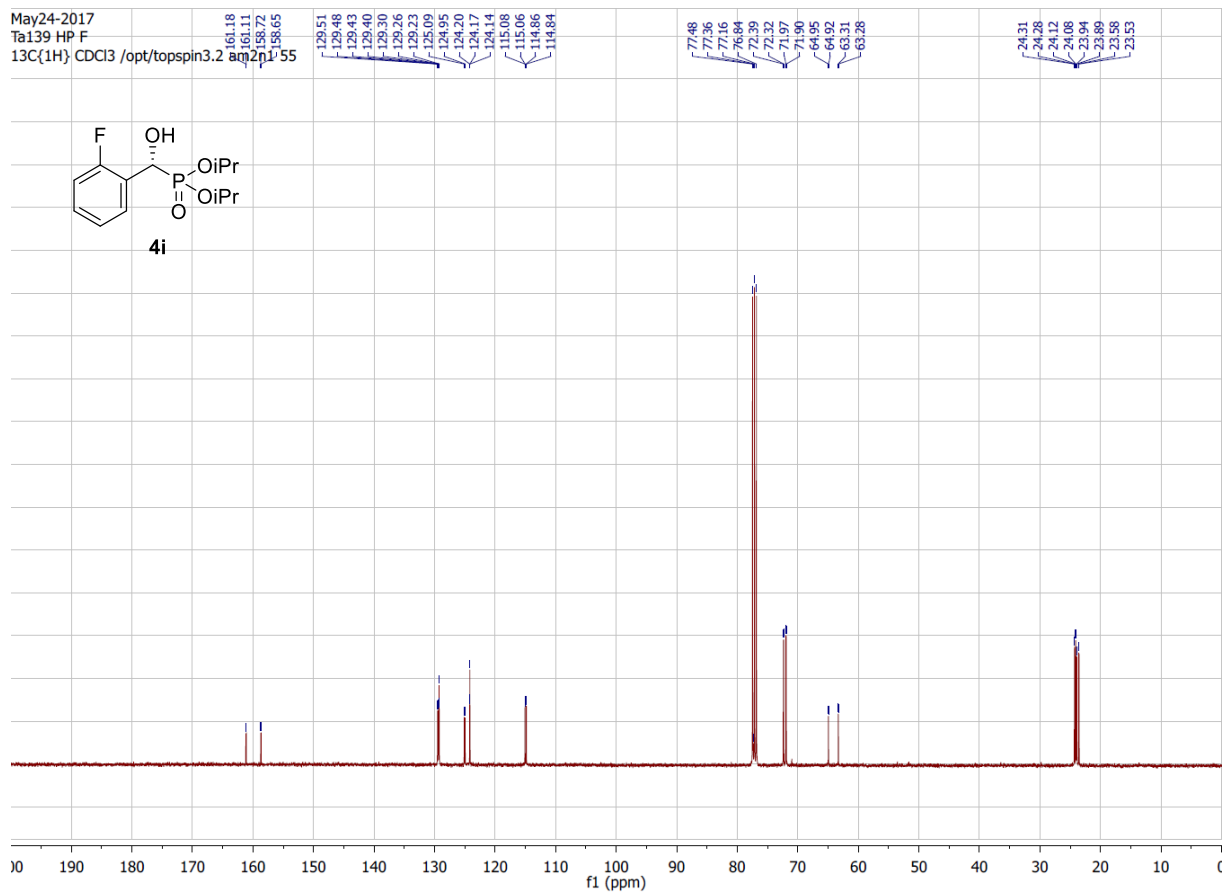

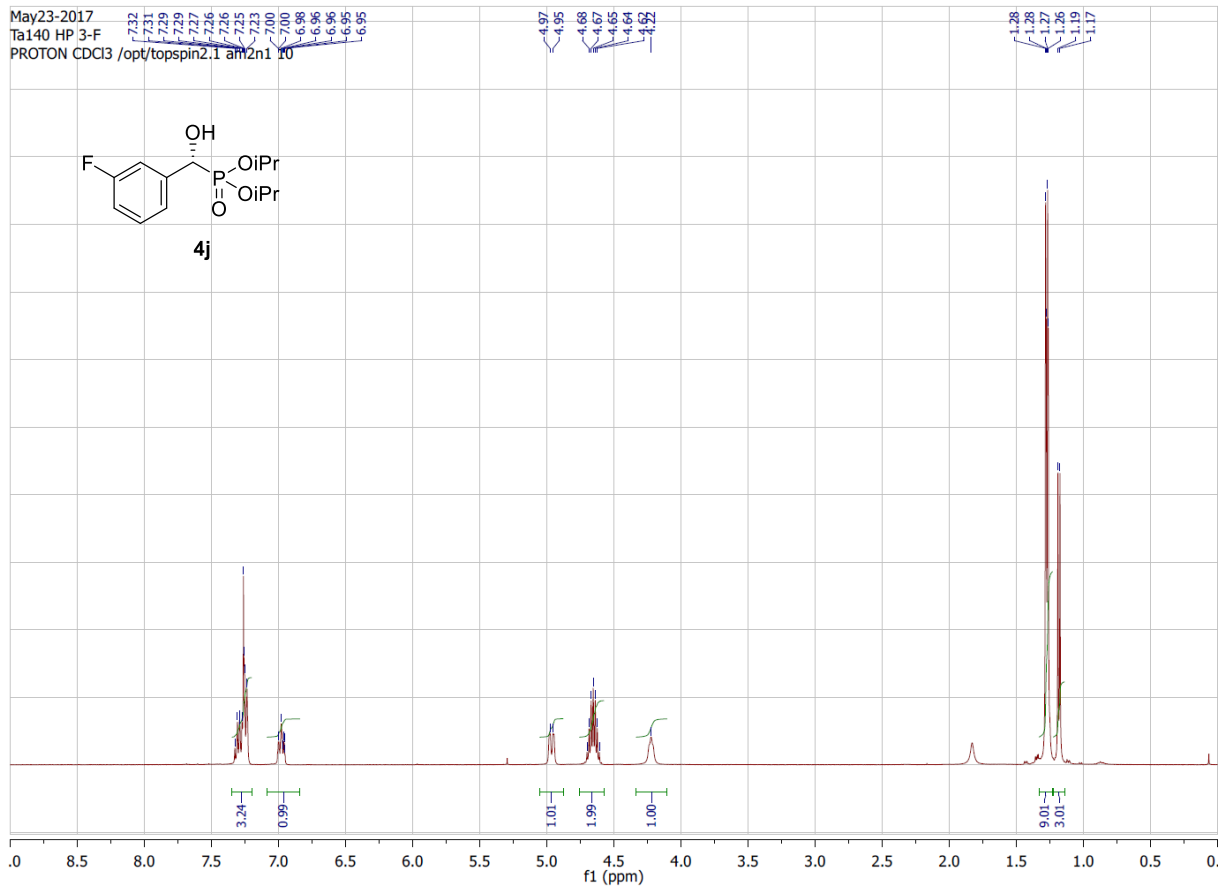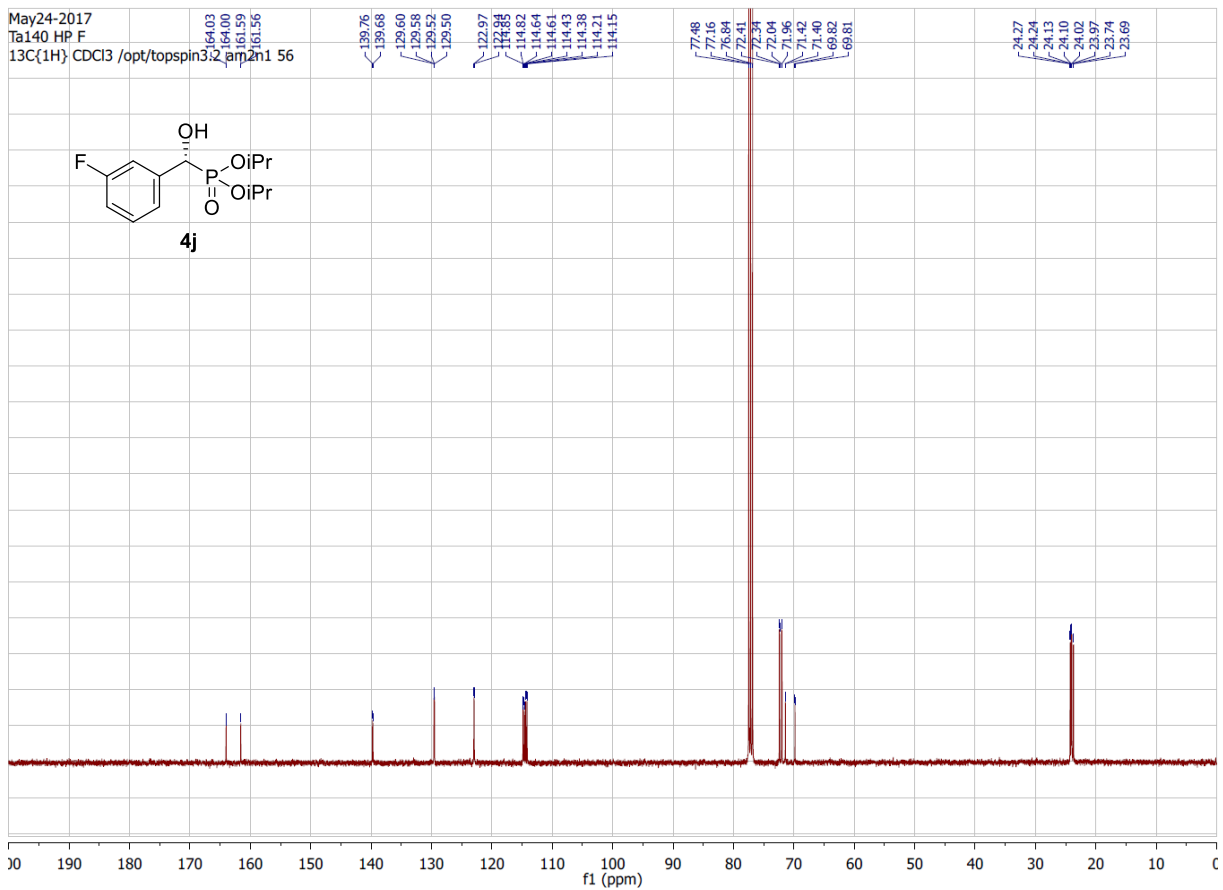



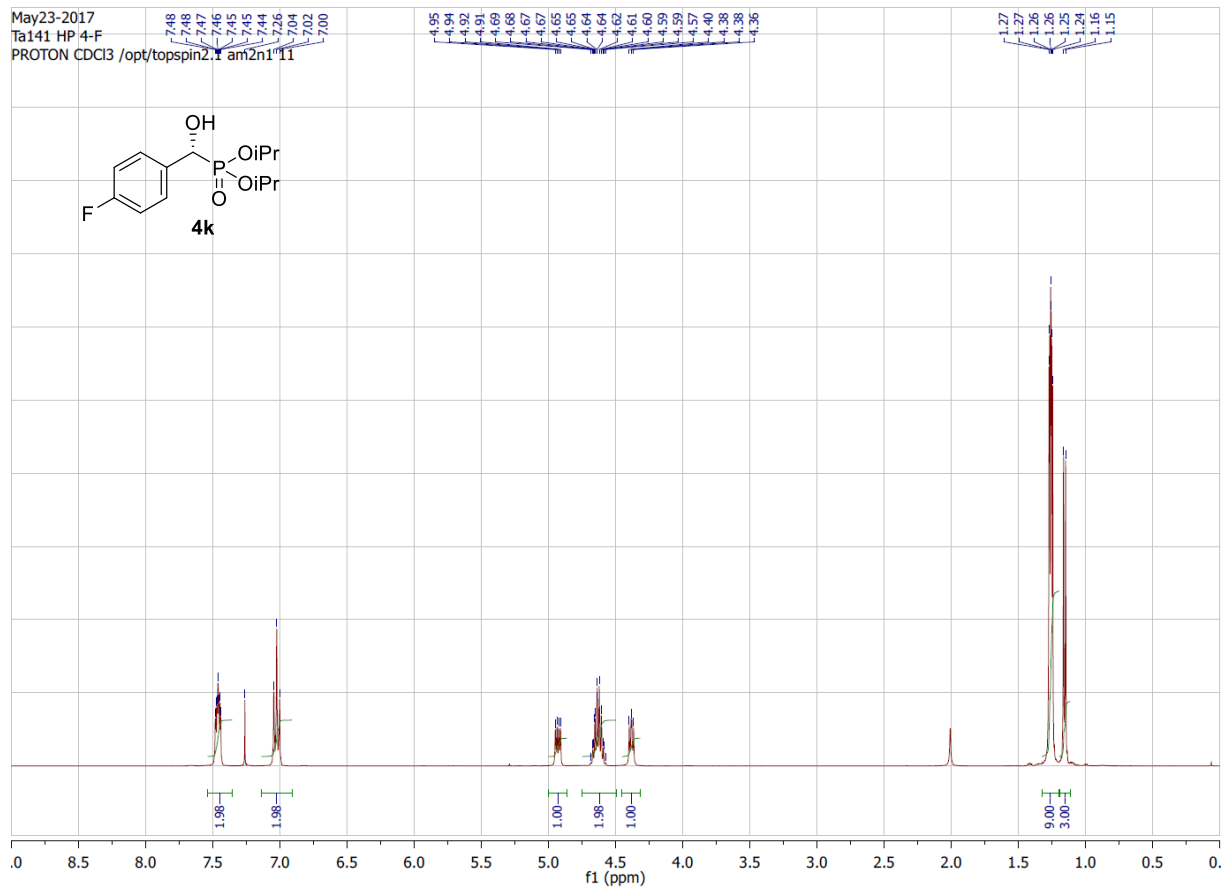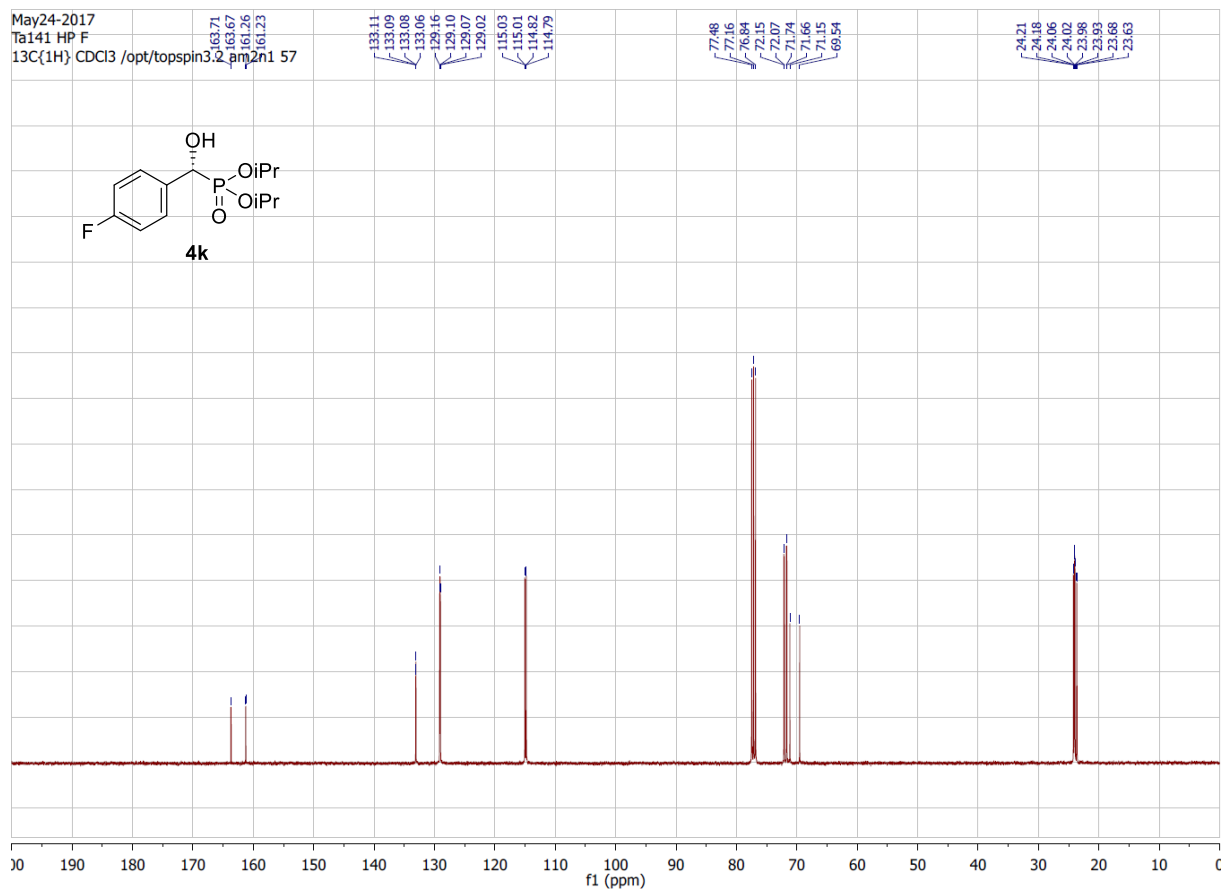

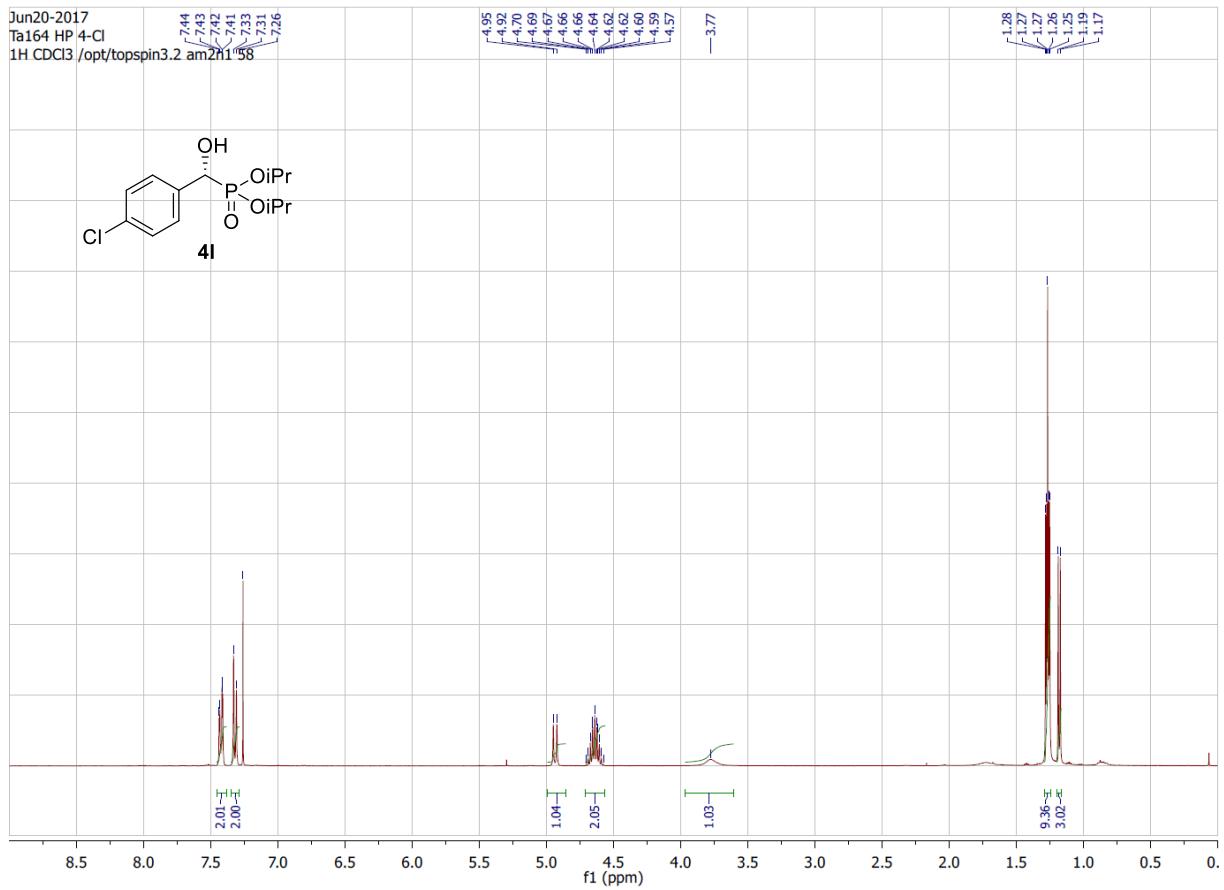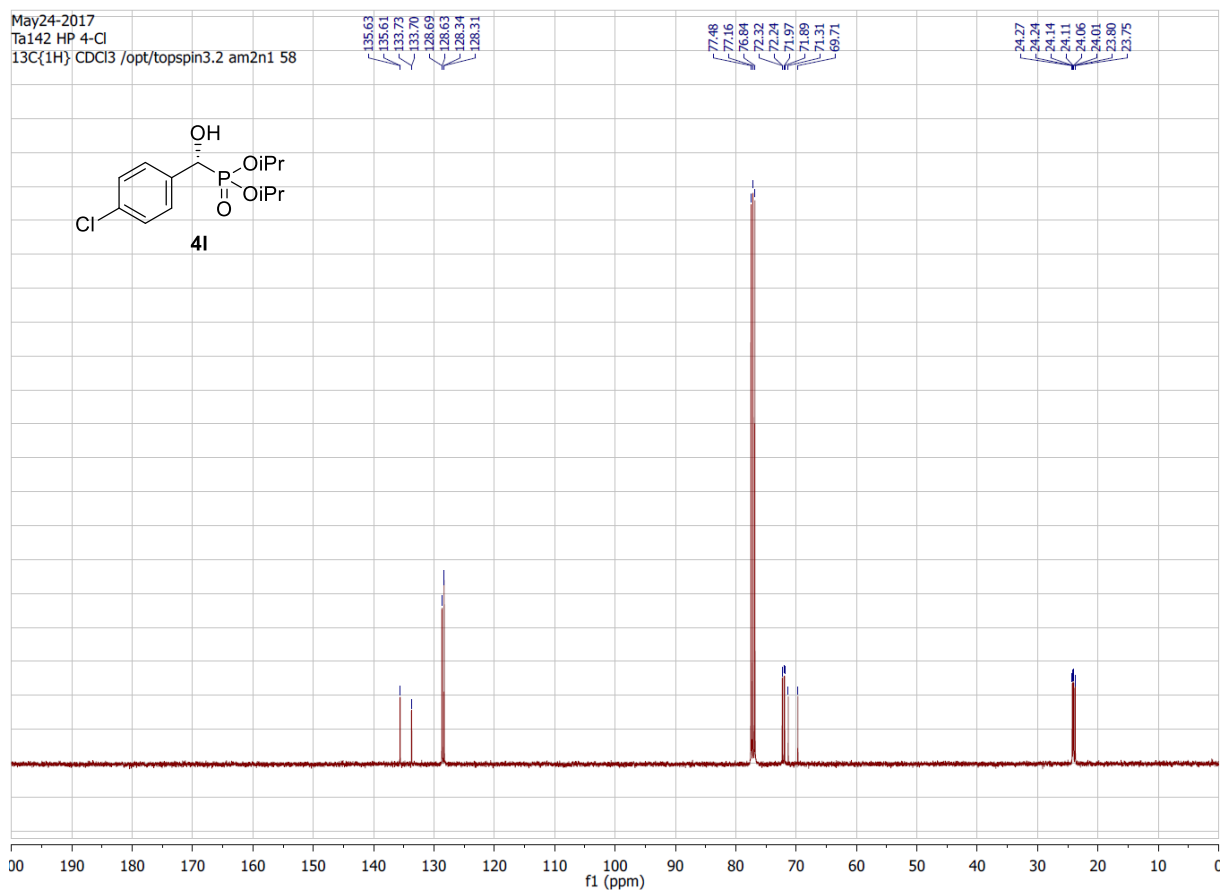

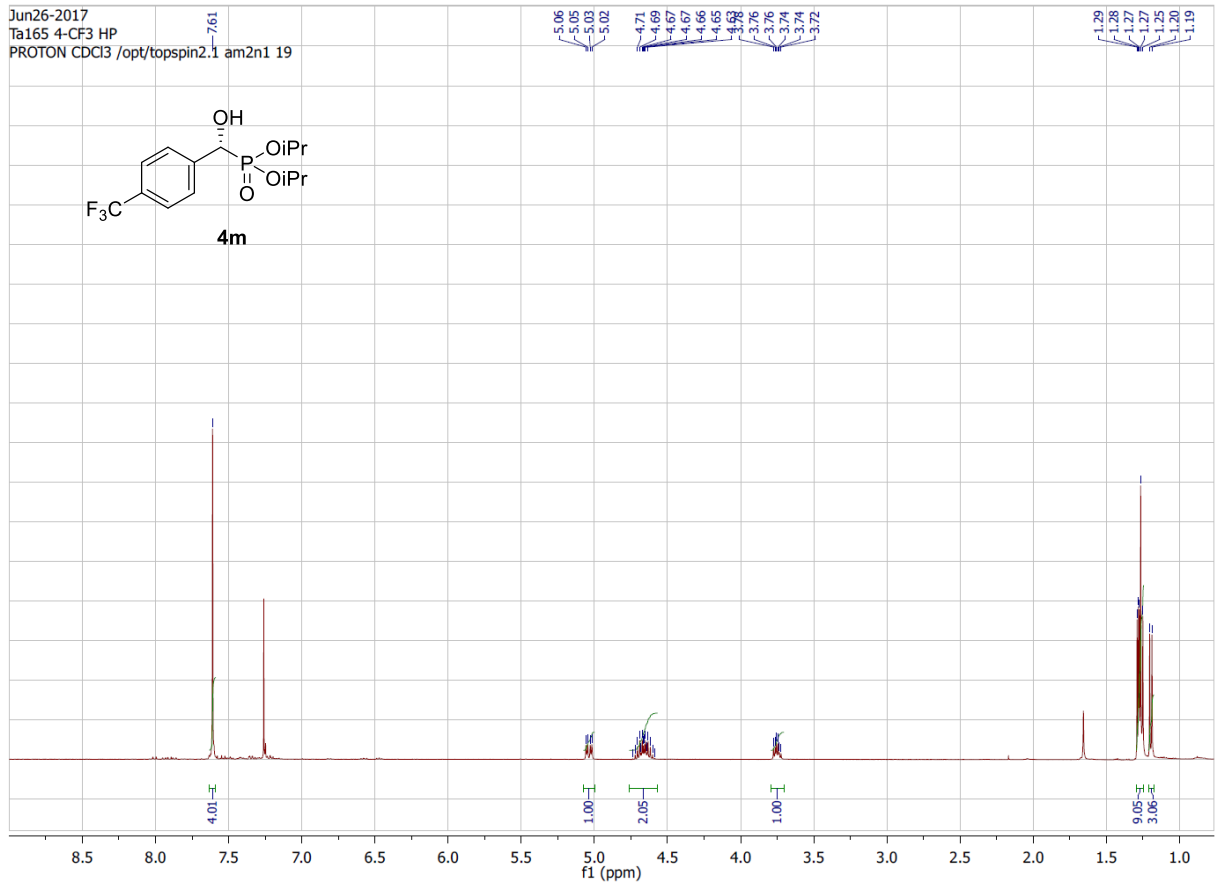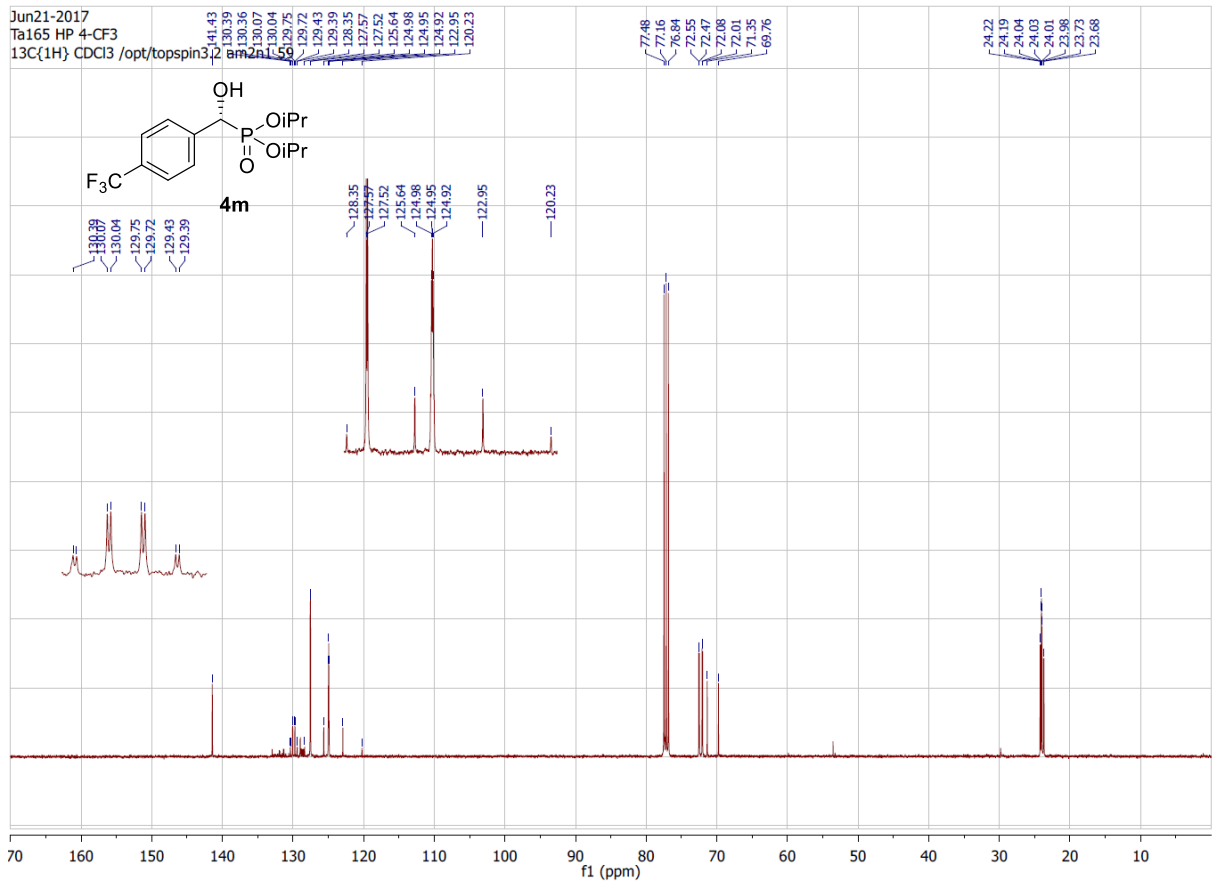

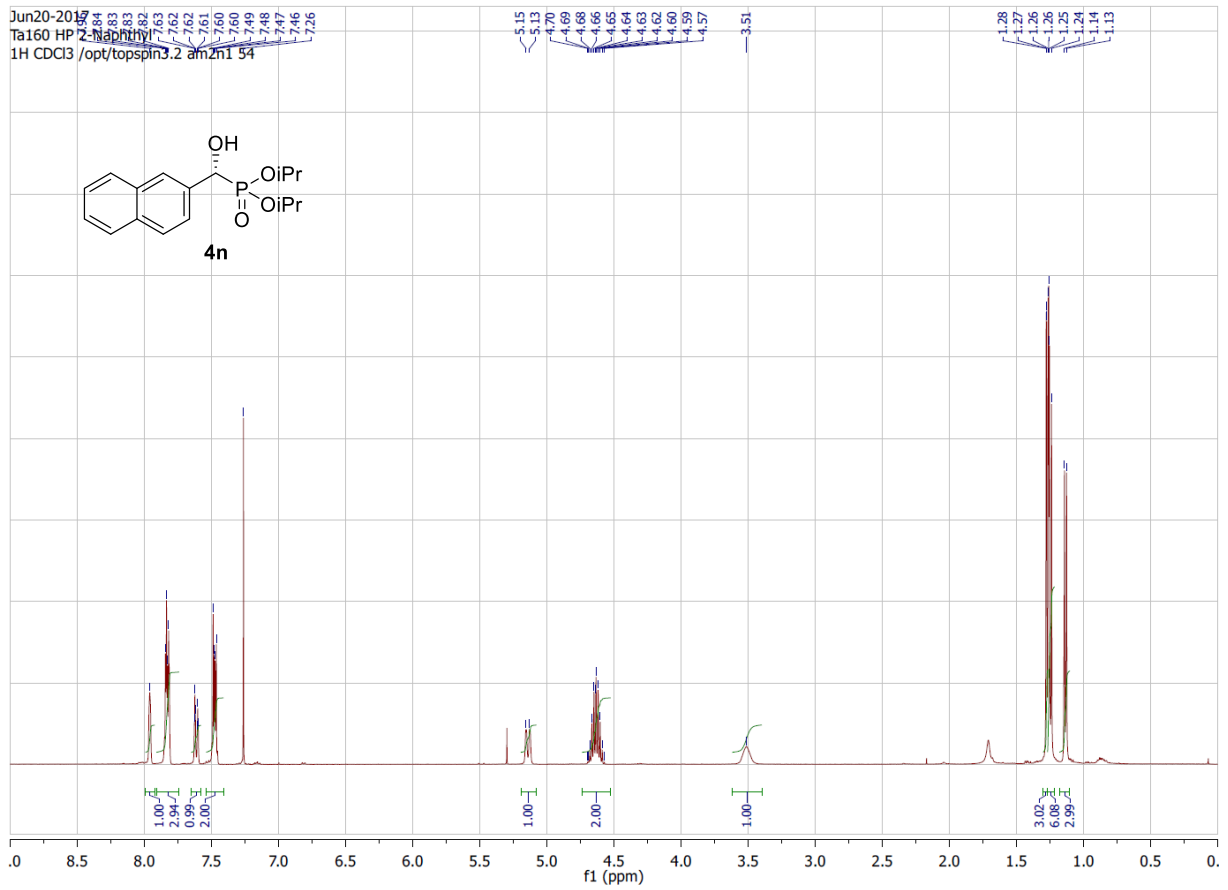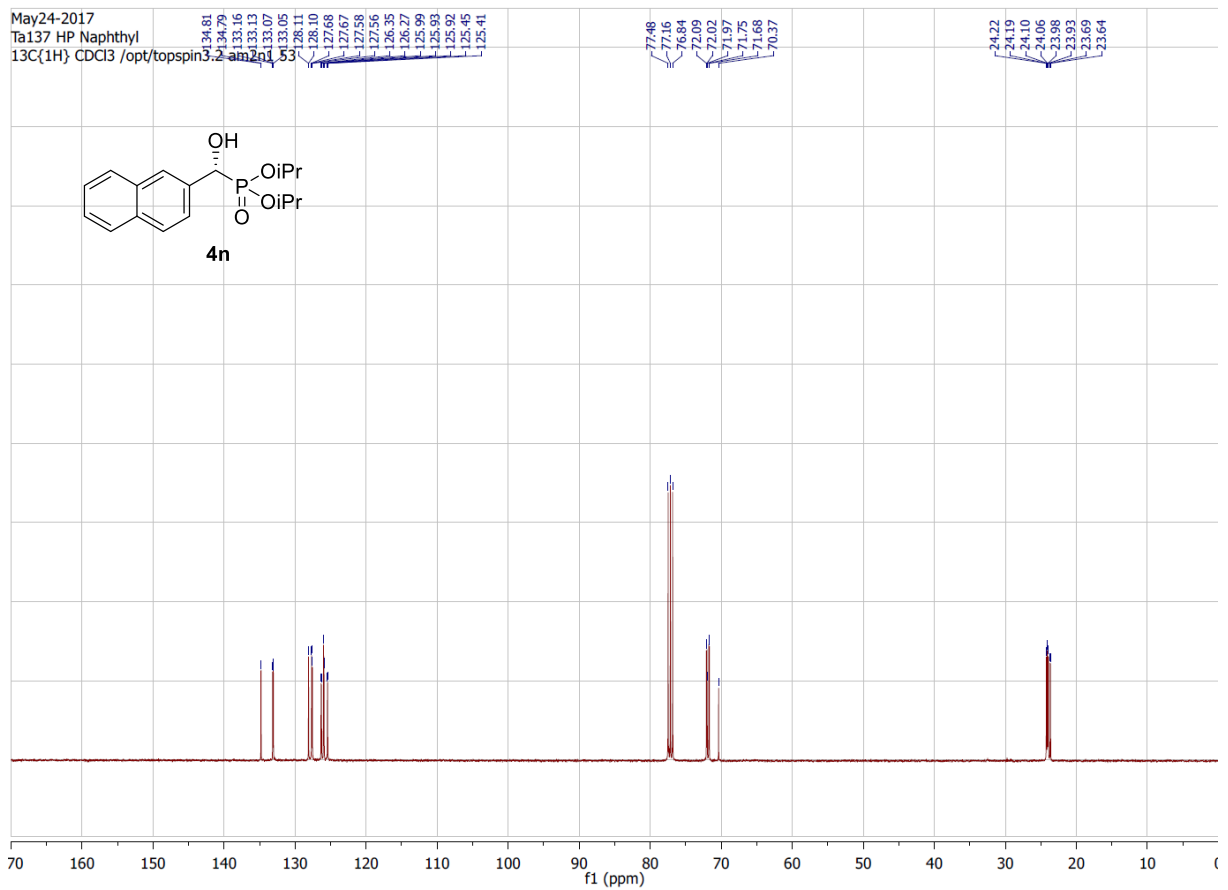

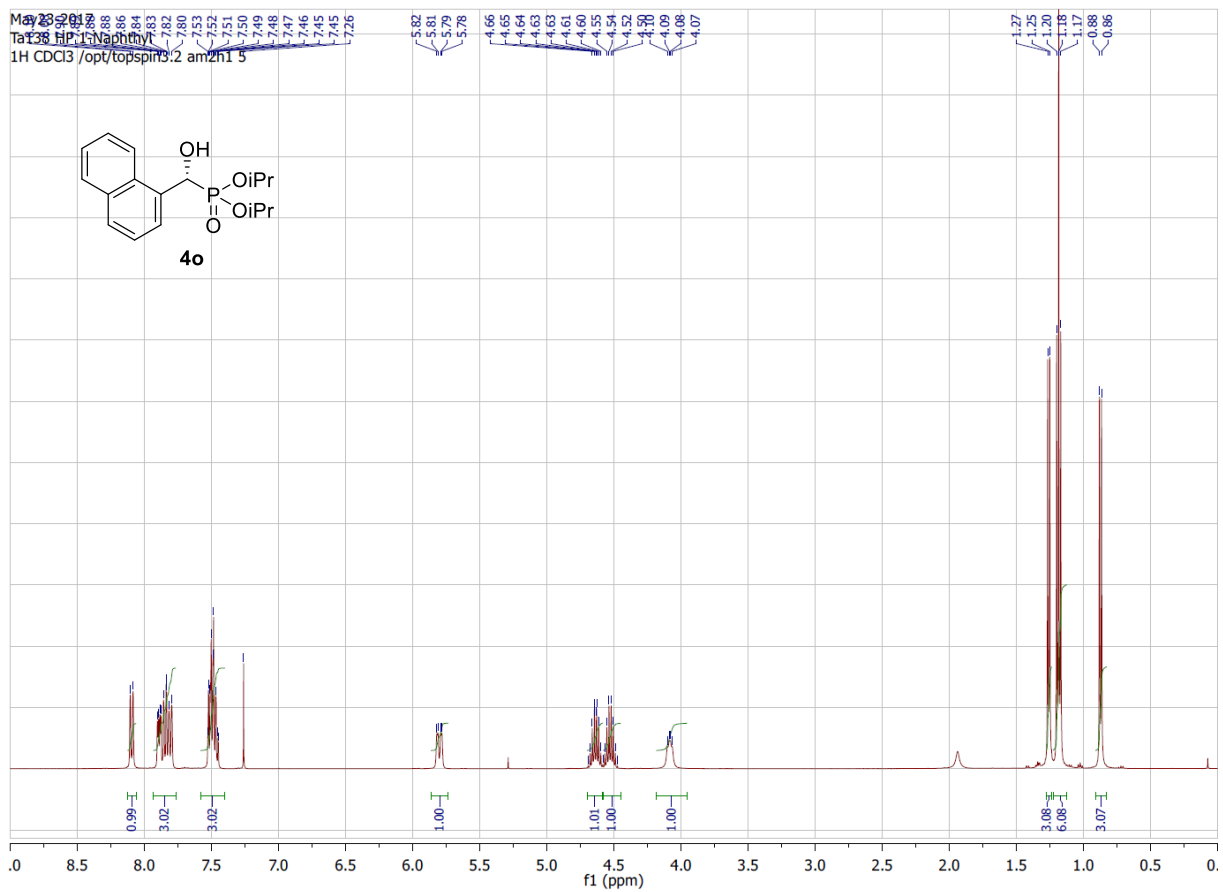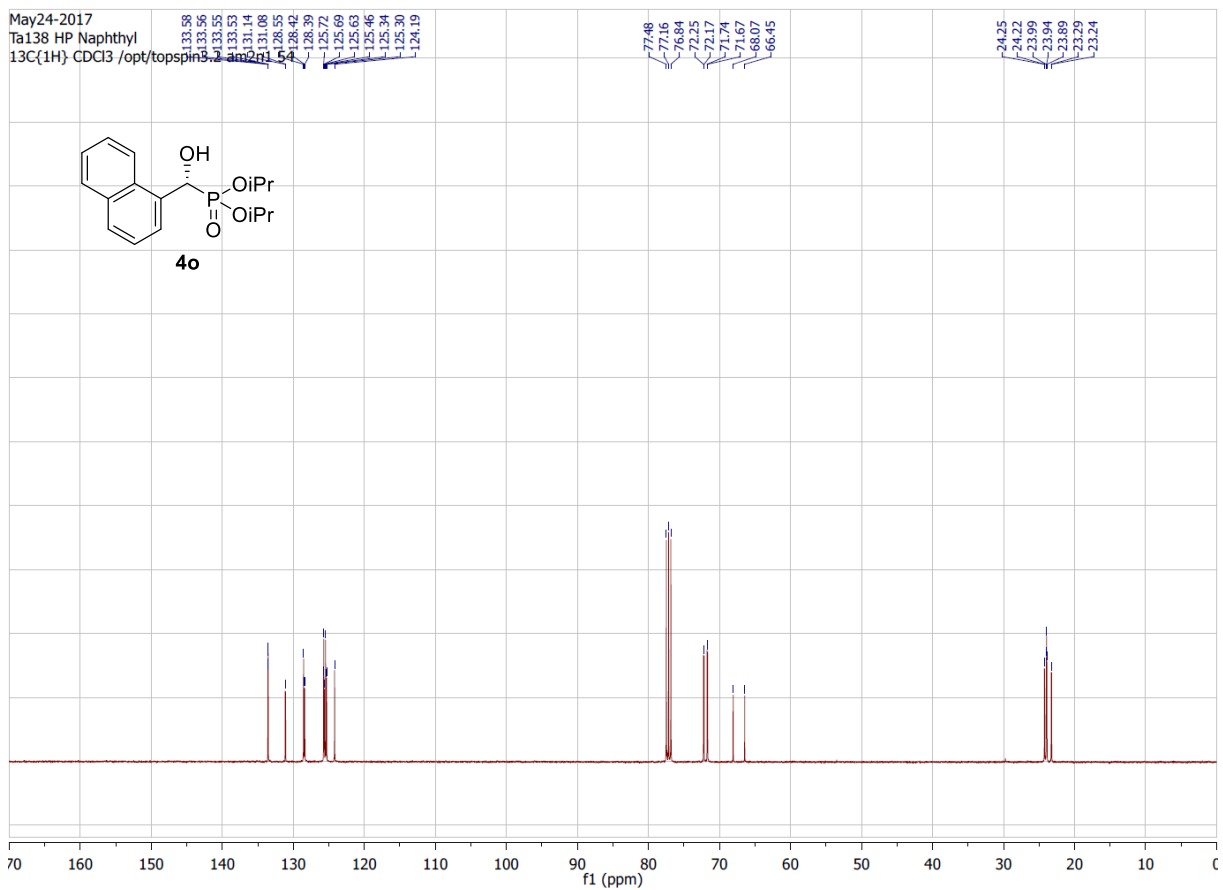

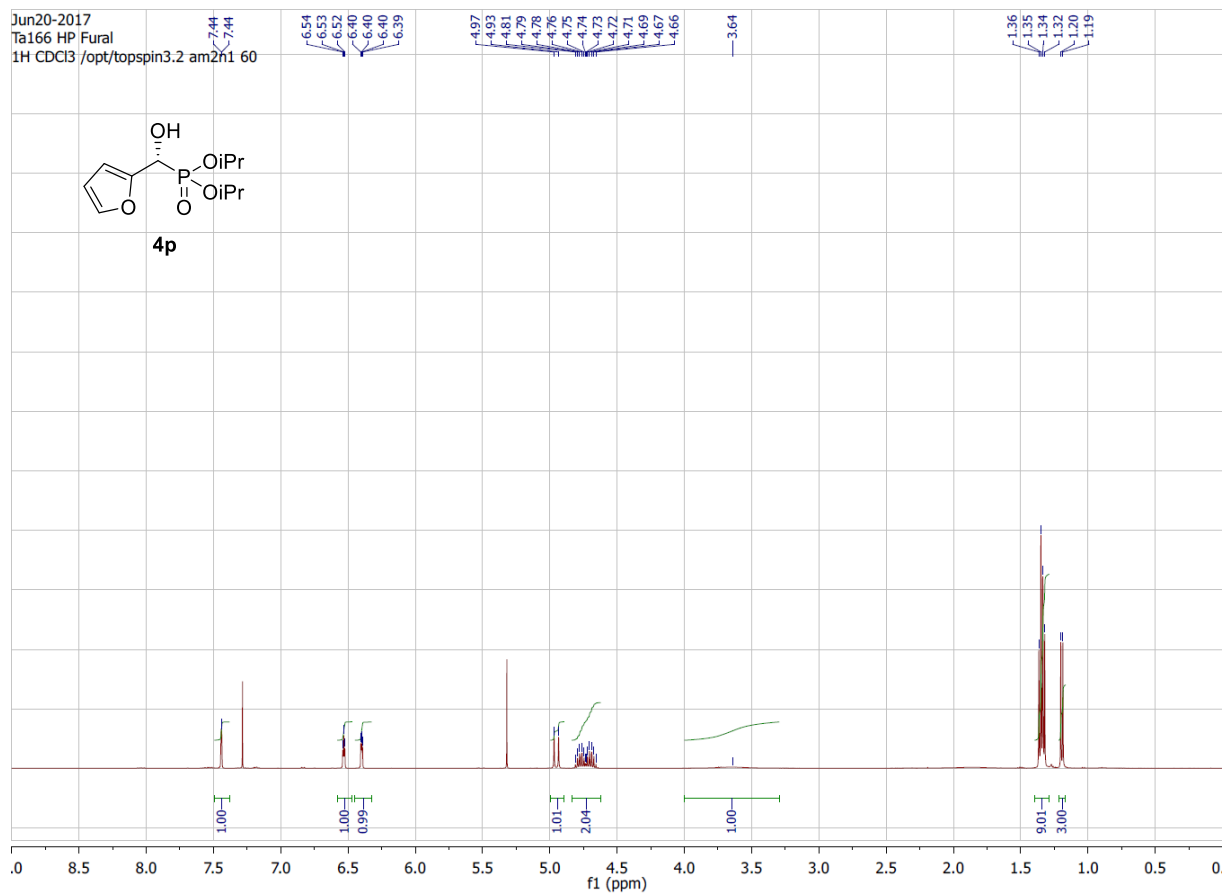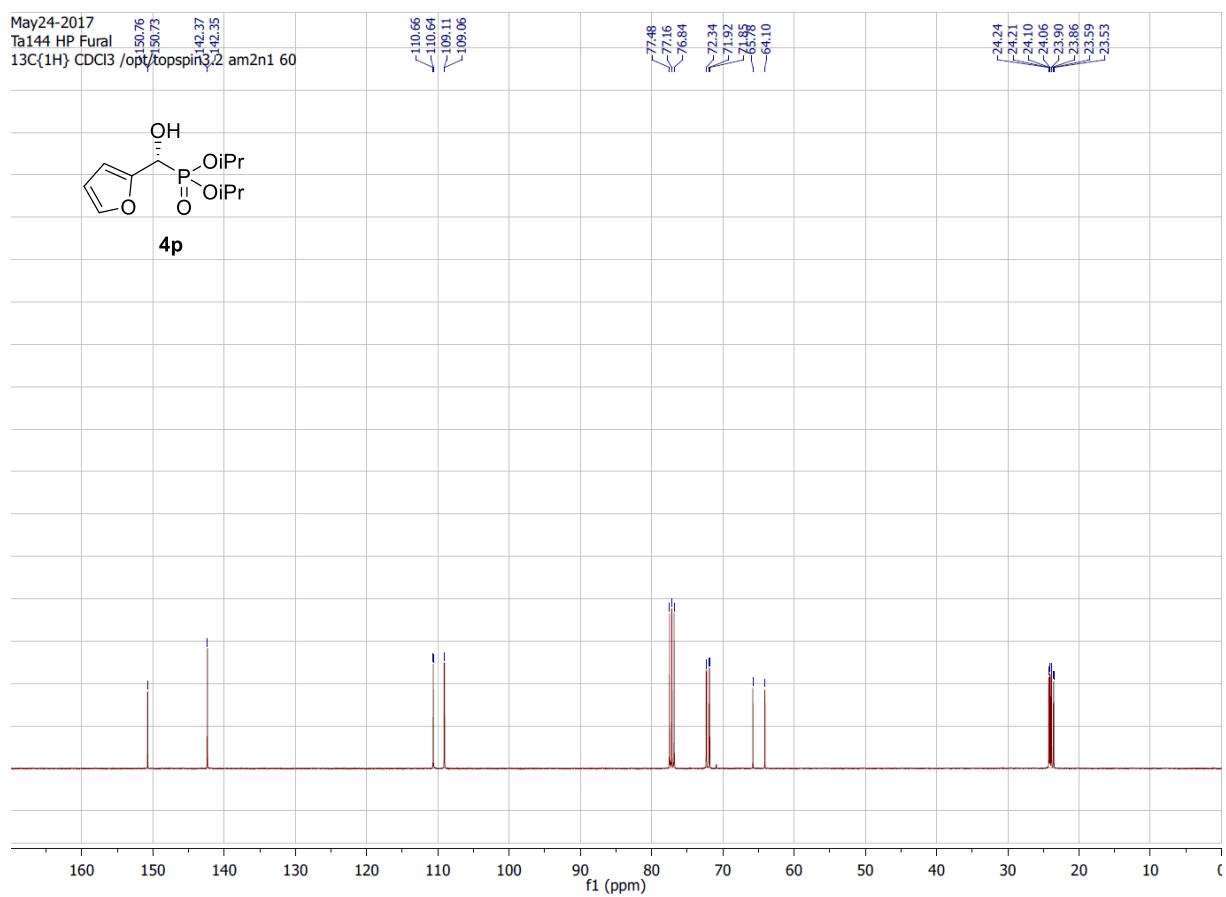

## V. HPLC chromatogram of phosphorylation products 4a-p

C:\LabSolutions\Data\projet2\AM2N1\Tahar\Hydrophosphonylation\Ta120 rac 2.lcd  
 Sample Name : Ta120 rac 2  
 Vial # : 1  
 Injection Volume : 20 uL  
 Data File Name : Ta120 rac 2.lcd  
 Method File Name : IC 90-10 70min 1.0 mL min.lcm  
 Report File Name : Default.lcr  
 Data Acquired : 04/05/2017 17:58:53

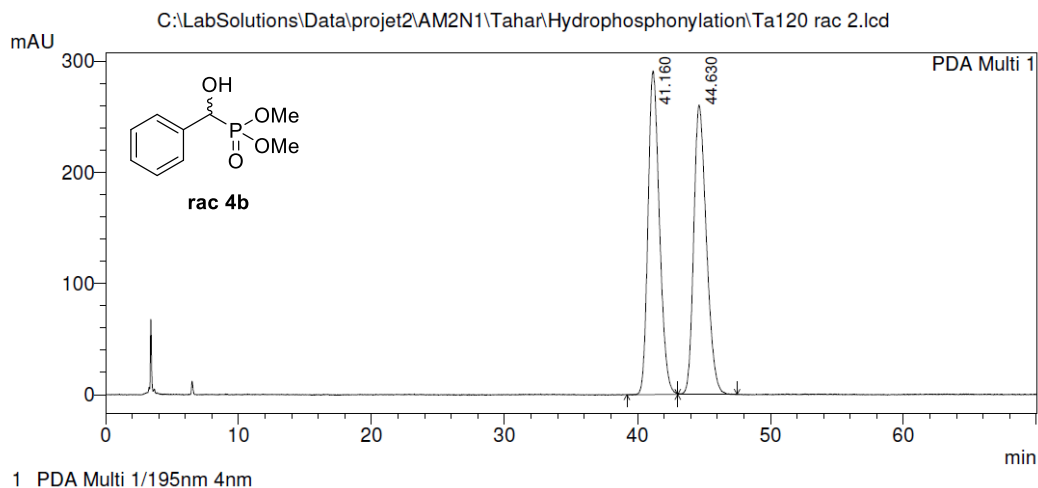

PeakTable

| Peak# | Ret. Time | Area     | Height | Area %  |
|-------|-----------|----------|--------|---------|
| 1     | 41.160    | 17384648 | 291320 | 50.124  |
| 2     | 44.630    | 17298456 | 260856 | 49.876  |
| Total |           | 34683104 | 552177 | 100.000 |

C:\LabSolutions\Data\projet2\AM2N1\Tahar\Hydrophosphonylation\Ta117 HP Chir (MeO)P3.lcd  
 Sample Name : Ta117 HP Chir (MeO)P3  
 Vial # : 5  
 Injection Volume : 10 uL  
 Data File Name : Ta117 HP Chir (MeO)P3.lcd  
 Method File Name : IC 90-10 60min 1.0 mL min.lcm  
 Report File Name : Default.lcr  
 Data Acquired : 23/05/2017 12:02:10

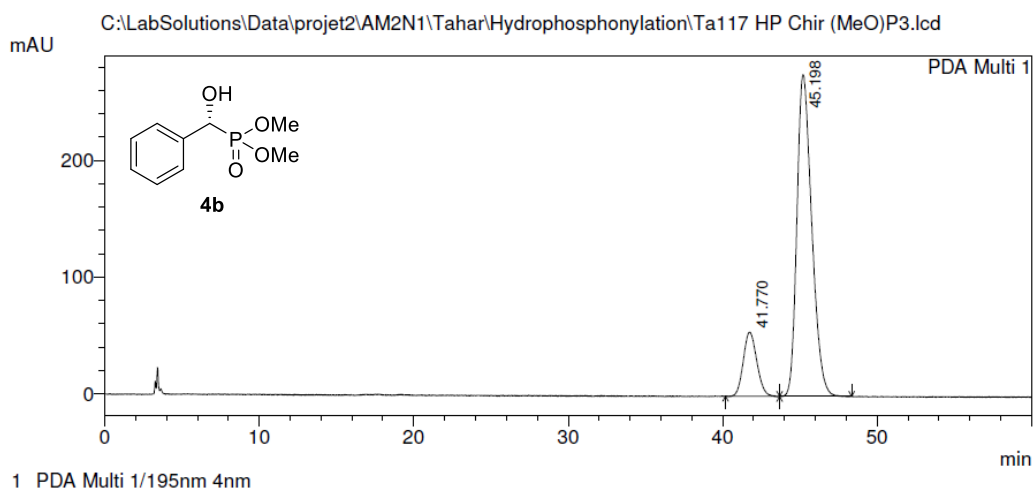

PeakTable

| Peak# | Ret. Time | Area     | Height | Area %  |
|-------|-----------|----------|--------|---------|
| 1     | 41.770    | 3338480  | 54874  | 15.374  |
| 2     | 45.198    | 18376174 | 275495 | 84.626  |
| Total |           | 21714654 | 330369 | 100.000 |

Sample Name : Ta4 rac 1  
 Vial # : 1  
 Injection Volume : 12 uL  
 Data File Name : Ta4 rac 1.lcd  
 Method File Name : IC 90-10 40min 1.0 mL min.lcm  
 Report File Name : Default.lcr  
 Data Acquired : 04/05/2017 11:36:05

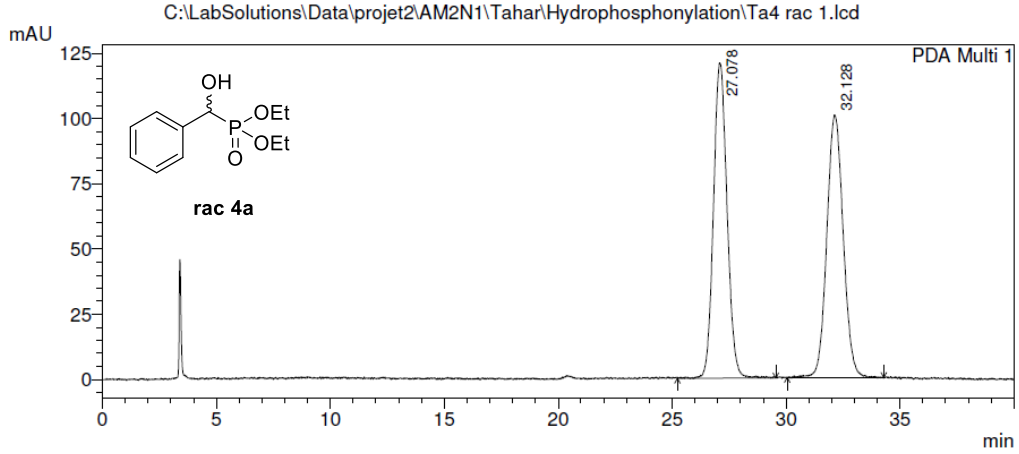

1 PDA Multi 1/195nm 4nm

PeakTable

| Peak# | Ret. Time | Area     | Height | Area %  |
|-------|-----------|----------|--------|---------|
| 1     | 27.078    | 5008103  | 120671 | 49.868  |
| 2     | 32.128    | 5034694  | 100626 | 50.132  |
| Total |           | 10042797 | 221297 | 100.000 |

Sample Name : Ta111 chir 1  
 Vial # : 2  
 Injection Volume : 16 uL  
 Data File Name : Ta111 chir 1.lcd  
 Method File Name : IC 90-10 40min 1.0 mL min.lcm  
 Report File Name : Default.lcr  
 Data Acquired : 04/05/2017 12:16:32

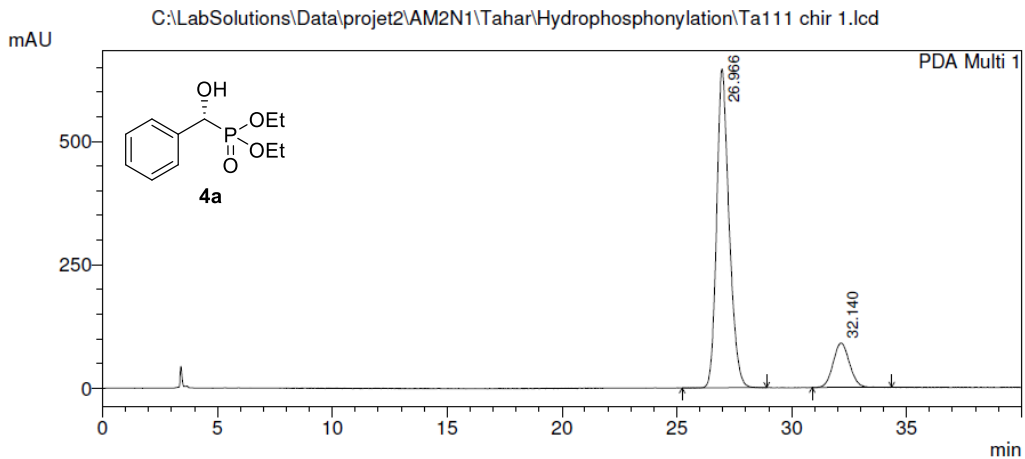

1 PDA Multi 1/195nm 4nm

PeakTable

| Peak# | Ret. Time | Area     | Height | Area %  |
|-------|-----------|----------|--------|---------|
| 1     | 26.966    | 24330152 | 645041 | 84.542  |
| 2     | 32.140    | 4448495  | 90173  | 15.458  |
| Total |           | 28778647 | 735214 | 100.000 |



Sample Name : C:\LabSolutions\Data\proj2\AM2N1\Tahar\Hydrophosphonylation\Ta122 rac 2.lcd  
 Vail # : Ta122 rac 2  
 Injection Volume : 5  
 Data File Name : 12 uL  
 Method File Name : Ta122 rac 2.lcd  
 Report File Name : IC 90-10 30min 1.0 mL min.lcm  
 Data Acquired : Default.lcr  
 : 04/05/2017 21:20:42

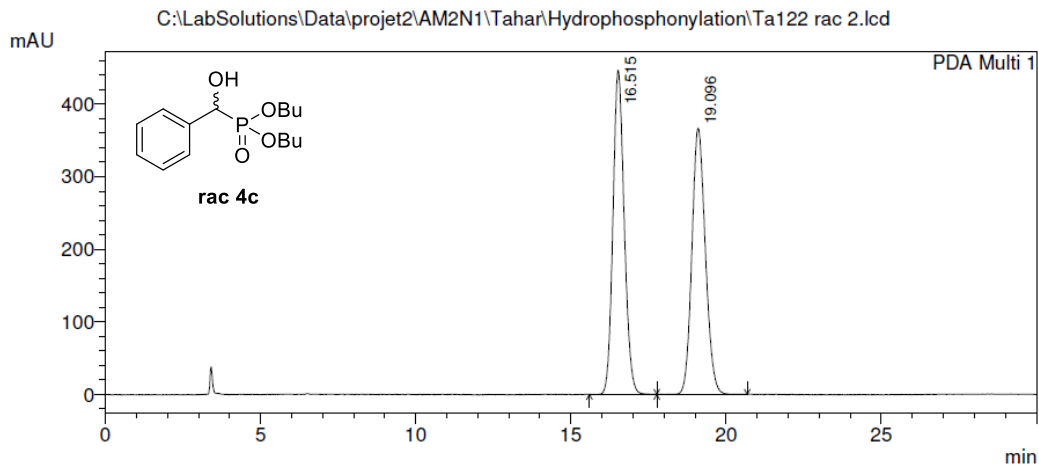

PeakTable

| Peak# | Ret. Time | Area     | Height | Area %  |
|-------|-----------|----------|--------|---------|
| 1     | 16.515    | 11302496 | 446405 | 50.530  |
| 2     | 19.096    | 11065509 | 366576 | 49.470  |
| Total |           | 22368005 | 812981 | 100.000 |

Sample Name : C:\LabSolutions\Data\proj2\AM2N1\Tahar\Hydrophosphonylation\Ta119 chir 2.lcd  
 Vail # : Ta119 chir 2  
 Injection Volume : 6  
 Data File Name : 12 uL  
 Method File Name : Ta119 chir 2.lcd  
 Report File Name : IC 90-10 30min 1.0 mL min.lcm  
 Data Acquired : Default.lcr  
 : 04/05/2017 21:51:07

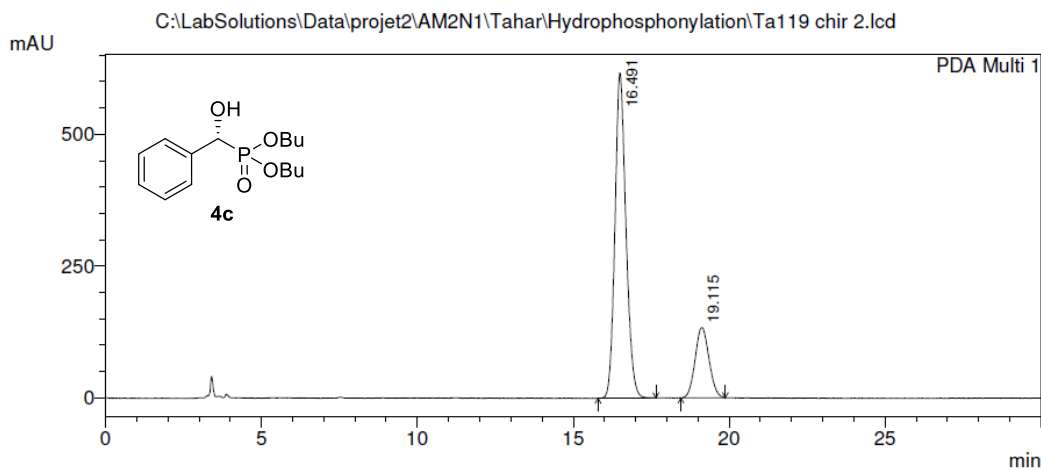

PeakTable

| Peak# | Ret. Time | Area     | Height | Area %  |
|-------|-----------|----------|--------|---------|
| 1     | 16.491    | 15101682 | 616175 | 78.521  |
| 2     | 19.115    | 4130916  | 133744 | 21.479  |
| Total |           | 19232598 | 749919 | 100.000 |

C:\LabSolutions\Data\projet2\AM2N1\Tahar\Hydrophosphonylation\Ta121 rac 2.lcd  
 Sample Name : Ta121 rac 2  
 Vail # : 3  
 Injection Volume : 12 uL  
 Data File Name : Ta121 rac 2.lcd  
 Method File Name : IC 90-10 30min 1.0 mL min.lcm  
 Report File Name : Default.lcr  
 Data Acquired : 04/05/2017 20:19:47

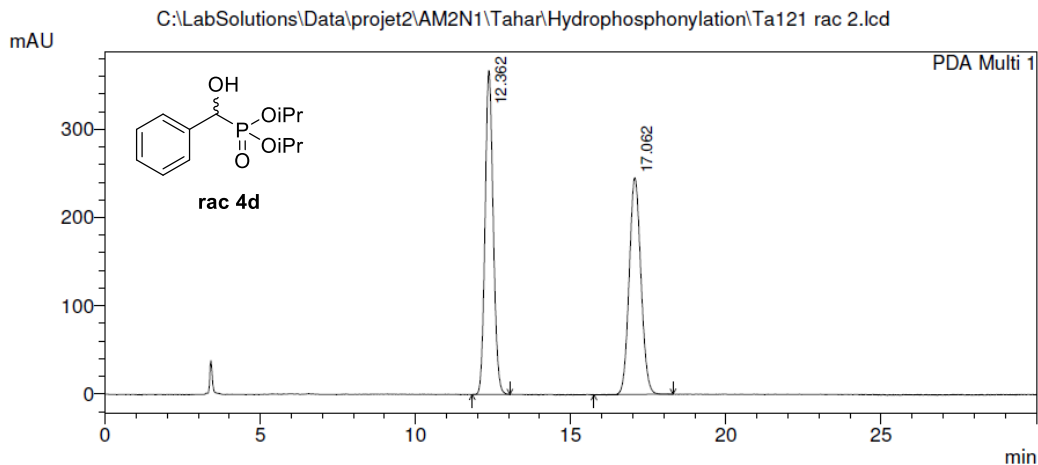

PeakTable

| Peak# | Ret. Time | Area     | Height | Area %  |
|-------|-----------|----------|--------|---------|
| 1     | 12.362    | 6688097  | 366979 | 50.958  |
| 2     | 17.062    | 6436522  | 245507 | 49.042  |
| Total |           | 13124619 | 612486 | 100.000 |

C:\LabSolutions\Data\projet2\AM2N1\Tahar\Hydrophosphonylation\Ta118 chir 2.lcd  
 Sample Name : Ta118 chir 2  
 Vail # : 4  
 Injection Volume : 12 uL  
 Data File Name : Ta118 chir 2.lcd  
 Method File Name : IC 90-10 30min 1.0 mL min.lcm  
 Report File Name : Default.lcr  
 Data Acquired : 04/05/2017 20:50:15

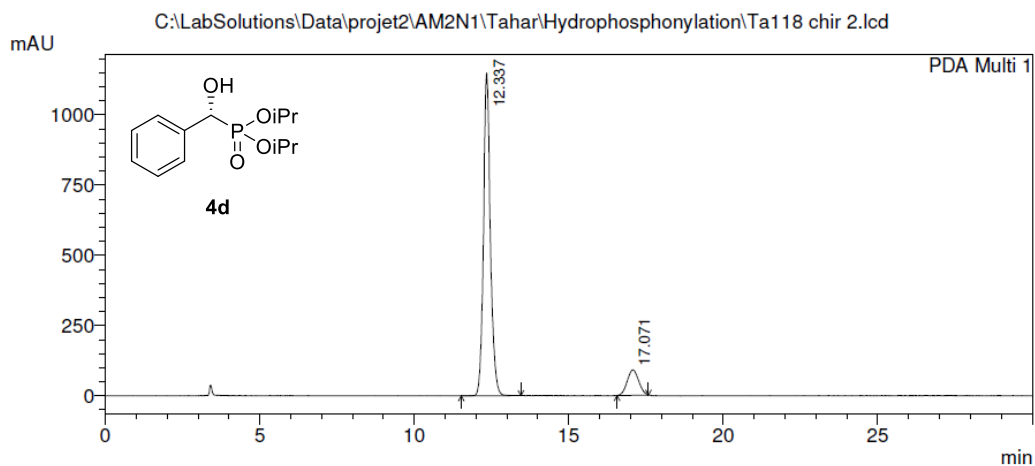

PeakTable

| Peak# | Ret. Time | Area     | Height  | Area %  |
|-------|-----------|----------|---------|---------|
| 1     | 12.337    | 17776715 | 1148528 | 88.443  |
| 2     | 17.071    | 2323016  | 90336   | 11.557  |
| Total |           | 20099732 | 1238865 | 100.000 |

C:\LabSolutions\Data\projet2\AM2N1\Tahar\Hydrophosphonylation\Ta155 2-MeO rac.lcd  
 Sample Name : Ta155 2-MeO rac  
 Vail # : 11  
 Injection Volume : 12 uL  
 Data File Name : Ta155 2-MeO rac.lcd  
 Method File Name : IC 90-10 60min 1.0 mL min.lcm  
 Report File Name : Default.lcr  
 Data Acquired : 20/06/2017 23:33:30

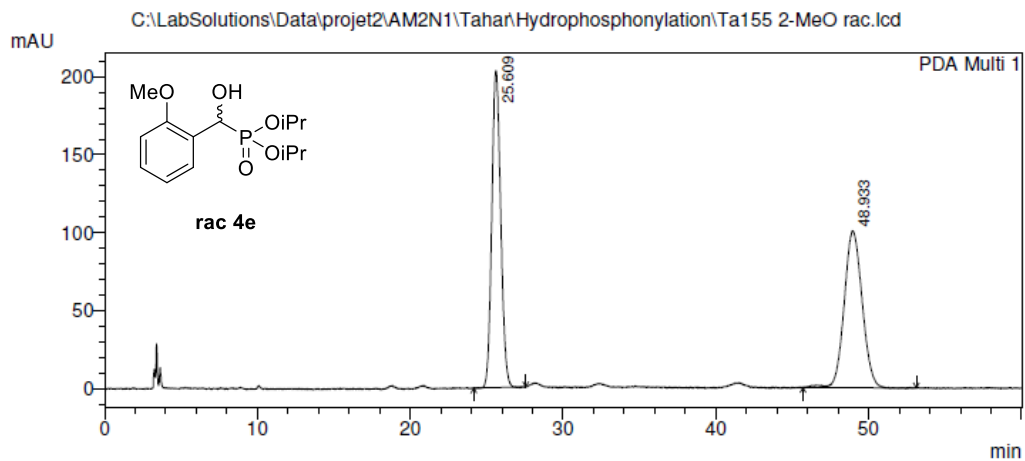

PeakTable

| Peak# | Ret. Time | Area     | Height | Area %  |
|-------|-----------|----------|--------|---------|
| 1     | 25.609    | 8212843  | 202857 | 49.954  |
| 2     | 48.933    | 8227899  | 100659 | 50.046  |
| Total |           | 16440742 | 303517 | 100.000 |

C:\LabSolutions\Data\projet2\AM2N1\Tahar\Hydrophosphonylation\Ta155 2-MeO chir.lcd  
 Sample Name : Ta155 2-MeO chir  
 Vail # : 12  
 Injection Volume : 12 uL  
 Data File Name : Ta155 2-MeO chir.lcd  
 Method File Name : IC 90-10 60min 1.0 mL min.lcm  
 Report File Name : Default.lcr  
 Data Acquired : 21/06/2017 00:33:57

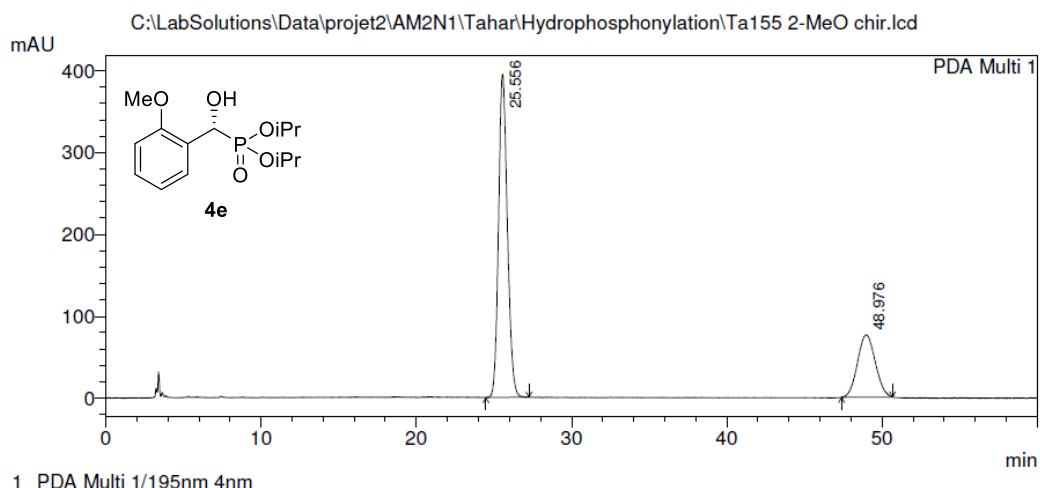

PeakTable

| Peak# | Ret. Time | Area     | Height | Area %  |
|-------|-----------|----------|--------|---------|
| 1     | 25.556    | 15641107 | 394720 | 72.099  |
| 2     | 48.976    | 6052799  | 76296  | 27.901  |
| Total |           | 21693906 | 471015 | 100.000 |

C:\LabSolutions\Data\projet2\AM2N1\Tahar\Hydrophosphonylation\Ta156 3-MeO rac.lcd  
 Sample Name : Ta156 3-MeO rac  
 Vail # : 9  
 Injection Volume : 12 uL  
 Data File Name : Ta156 3-MeO rac.lcd  
 Method File Name : IC 90-10 60min 1.0 mL min.lcm  
 Report File Name : Default.lcr  
 Data Acquired : 20/06/2017 21:32:33

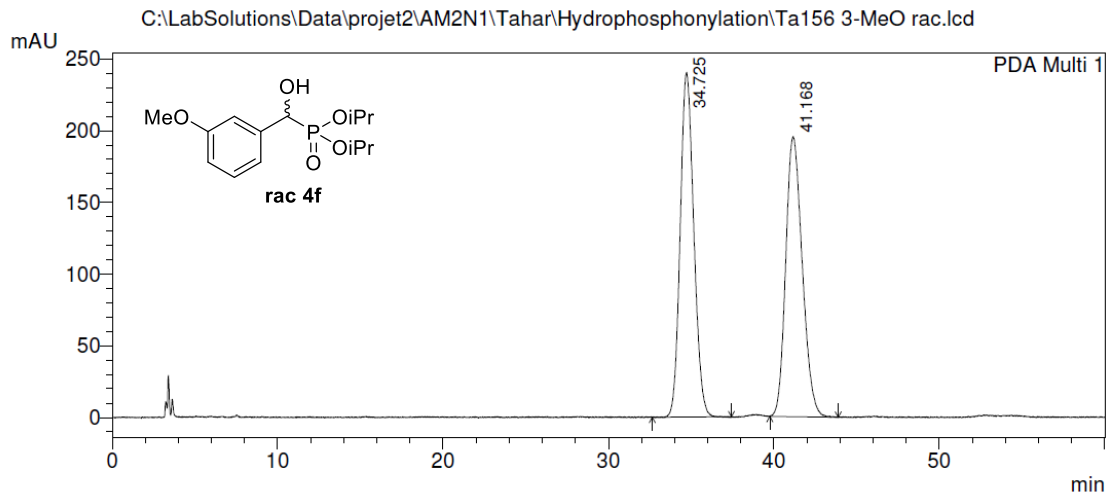

PeakTable

| Peak# | Ret. Time | Area     | Height | Area %  |
|-------|-----------|----------|--------|---------|
| 1     | 34.725    | 13729534 | 240463 | 50.230  |
| 2     | 41.168    | 13603590 | 195595 | 49.770  |
| Total |           | 27333124 | 436059 | 100.000 |

C:\LabSolutions\Data\projet2\AM2N1\Tahar\Hydrophosphonylation\Ta156 3-MeO chir.lcd  
 Sample Name : Ta156 3-MeO chir  
 Vail # : 10  
 Injection Volume : 12 uL  
 Data File Name : Ta156 3-MeO chir.lcd  
 Method File Name : IC 90-10 60min 1.0 mL min.lcm  
 Report File Name : Default.lcr  
 Data Acquired : 20/06/2017 22:33:01

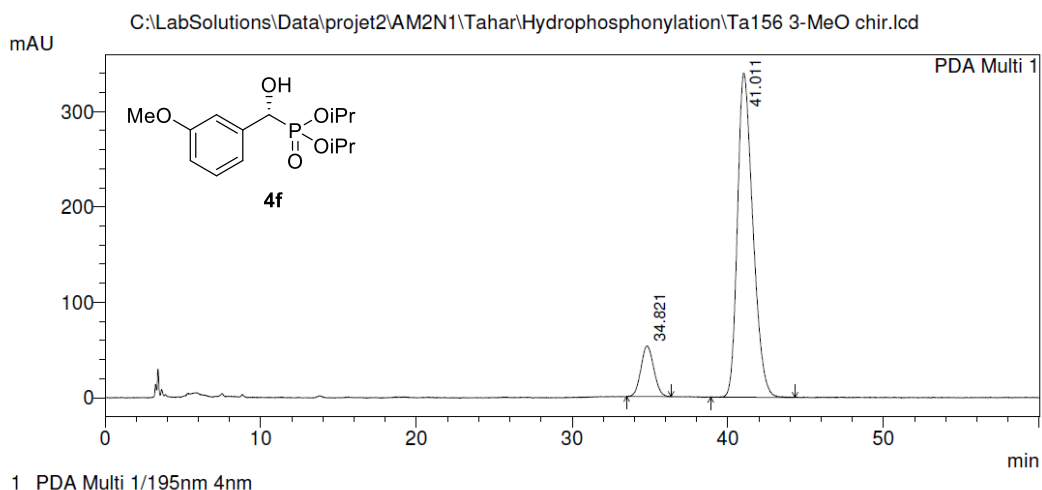

PeakTable

| Peak# | Ret. Time | Area     | Height | Area %  |
|-------|-----------|----------|--------|---------|
| 1     | 34.821    | 3050956  | 53011  | 11.511  |
| 2     | 41.011    | 23454606 | 340123 | 88.489  |
| Total |           | 26505562 | 393134 | 100.000 |

C:\LabSolutions\Data\projet2\AM2N1\Tahar\Hydrophosphonylation\Ta157 4-MeO rac.lcd  
 Sample Name : Ta157 4-MeO rac  
 Vail # : 7  
 Injection Volume : 12 uL  
 Data File Name : Ta157 4-MeO rac.lcd  
 Method File Name : IC 90-10 40min 1.0 mL min.lcm  
 Report File Name : Default.lcr  
 Data Acquired : 20/06/2017 20:11:37

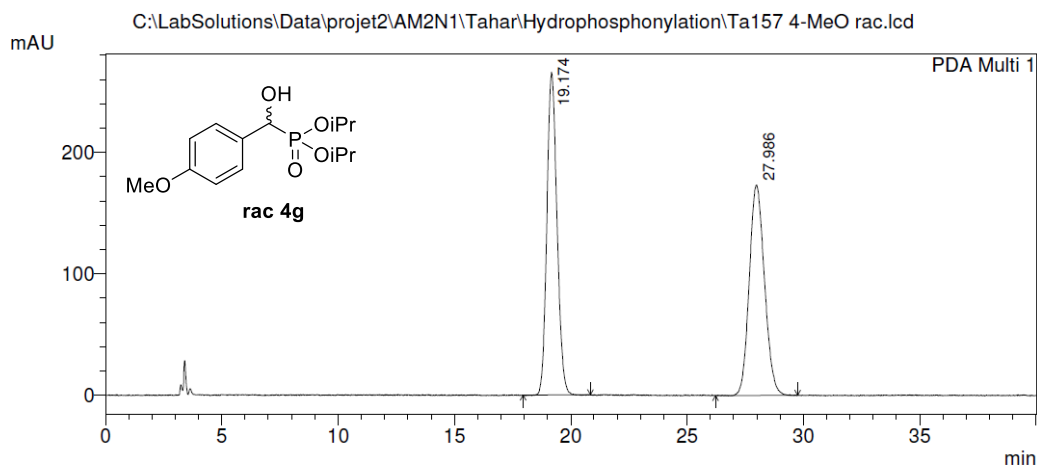

PeakTable

| Peak# | Ret. Time | Area     | Height | Area %  |
|-------|-----------|----------|--------|---------|
| 1     | 19.174    | 8015197  | 266049 | 50.370  |
| 2     | 27.986    | 7897333  | 173523 | 49.630  |
| Total |           | 15912531 | 439573 | 100.000 |

C:\LabSolutions\Data\projet2\AM2N1\Tahar\Hydrophosphonylation\Ta157 4-MeO chir.lcd  
 Sample Name : Ta157 4-MeO chir  
 Vail # : 8  
 Injection Volume : 12 uL  
 Data File Name : Ta157 4-MeO chir.lcd  
 Method File Name : IC 90-10 40min 1.0 mL min.lcm  
 Report File Name : Default.lcr  
 Data Acquired : 20/06/2017 20:52:05

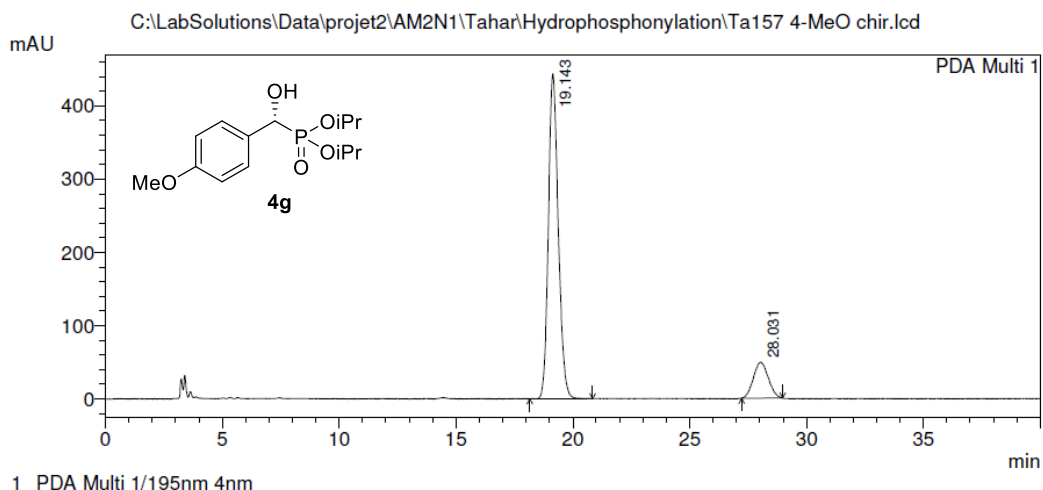

PeakTable

| Peak# | Ret. Time | Area     | Height | Area %  |
|-------|-----------|----------|--------|---------|
| 1     | 19.143    | 13031807 | 443553 | 85.667  |
| 2     | 28.031    | 2180380  | 49292  | 14.333  |
| Total |           | 15212187 | 492845 | 100.000 |

C:\LabSolutions\Data\projet2\AM2N1\Tahar\Hydrophosphonylation\Ta158 4-Methyl rac.lcd  
 Sample Name : Ta158 4-Methyl rac  
 Vail # : 5  
 Injection Volume : 12 uL  
 Data File Name : Ta158 4-Methyl rac.lcd  
 Method File Name : IC 90-10 30min 1.0 mL min.lcm  
 Report File Name : Default.lcr  
 Data Acquired : 20/06/2017 19:10:39

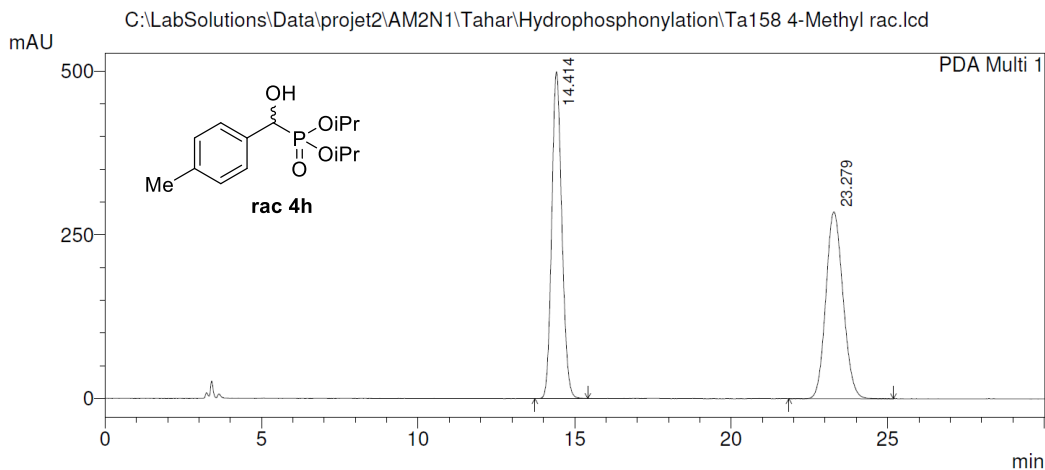

PeakTable

| Peak# | Ret. Time | Area     | Height | Area %  |
|-------|-----------|----------|--------|---------|
| 1     | 14.414    | 11202520 | 499419 | 50.628  |
| 2     | 23.279    | 10924534 | 285423 | 49.372  |
| Total |           | 22127054 | 784842 | 100.000 |

C:\LabSolutions\Data\projet2\AM2N1\Tahar\Hydrophosphonylation\Ta158 4-Methyl chir.lcd  
 Sample Name : Ta158 4-Methyl chir  
 Vail # : 6  
 Injection Volume : 12 uL  
 Data File Name : Ta158 4-Methyl chir.lcd  
 Method File Name : IC 90-10 30min 1.0 mL min.lcm  
 Report File Name : Default.lcr  
 Data Acquired : 20/06/2017 19:41:09

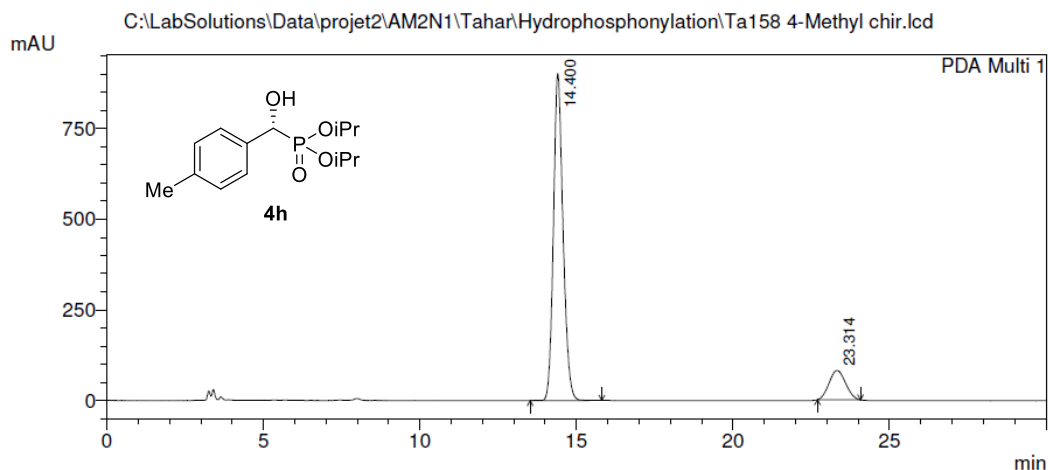

PeakTable

| Peak# | Ret. Time | Area     | Height | Area %  |
|-------|-----------|----------|--------|---------|
| 1     | 14.400    | 19214283 | 902031 | 86.592  |
| 2     | 23.314    | 2975034  | 80957  | 13.408  |
| Total |           | 22189317 | 982988 | 100.000 |

C:\LabSolutions\Data\projet2\AM2N1\Tahar\Hydrophosphonylation\Ta161 rac 2-F.lcd  
 Sample Name : Ta161 rac 2-F  
 Vail # : 1  
 Injection Volume : 9 uL  
 Data File Name : Ta161 rac 2-F.lcd  
 Method File Name : IC 90-10 20min 1.0 mL min.lcm  
 Report File Name : Default.lcr  
 Data Acquired : 19/06/2017 12:19:07

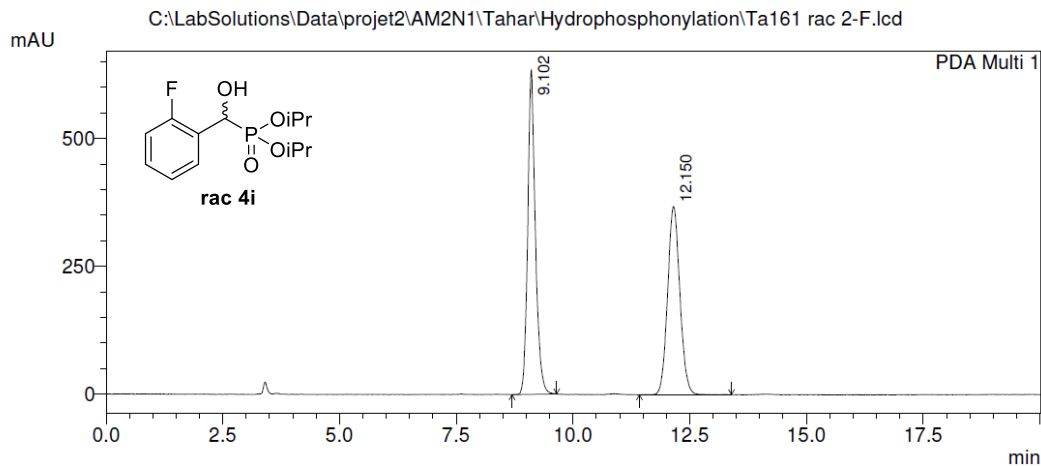

PeakTable

| Peak# | Ret. Time | Area     | Height  | Area %  |
|-------|-----------|----------|---------|---------|
| 1     | 9.102     | 7228657  | 636211  | 51.788  |
| 2     | 12.150    | 6729463  | 368507  | 48.212  |
| Total |           | 13958120 | 1004718 | 100.000 |

C:\LabSolutions\Data\projet2\AM2N1\Tahar\Hydrophosphonylation\Ta161 chir 2-F.lcd  
 Sample Name : Ta161 chir 2-F  
 Vail # : 2  
 Injection Volume : 9 uL  
 Data File Name : Ta161 chir 2-F.lcd  
 Method File Name : IC 90-10 20min 1.0 mL min.lcm  
 Report File Name : Default.lcr  
 Data Acquired : 19/06/2017 12:39:35

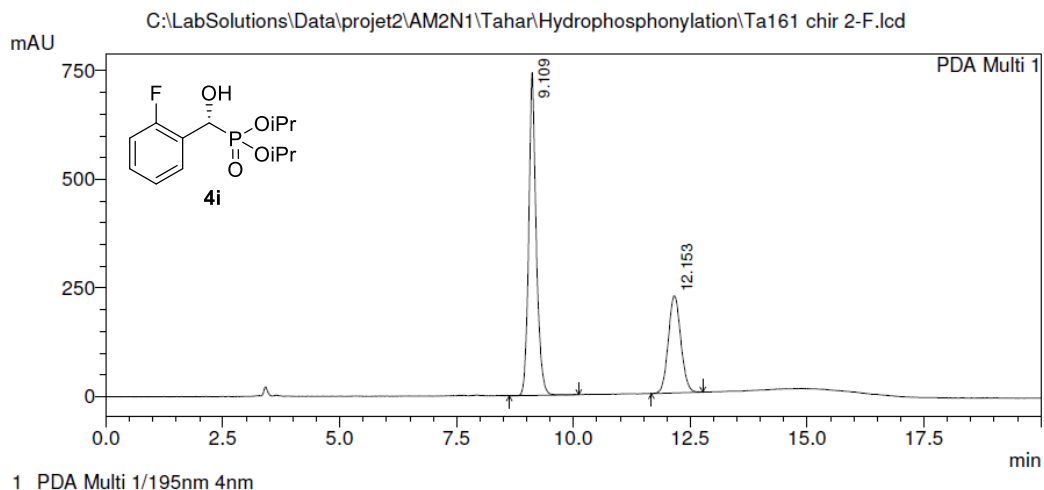

PeakTable

| Peak# | Ret. Time | Area     | Height | Area %  |
|-------|-----------|----------|--------|---------|
| 1     | 9.109     | 8263565  | 742970 | 66.481  |
| 2     | 12.153    | 4166462  | 223998 | 33.519  |
| Total |           | 12430026 | 966968 | 100.000 |

C:\LabSolutions\Data\projet2\AM2N1\Tahar\Hydrophosphonylation\Ta162 rac 3-F.lcd  
 Sample Name : Ta162 rac 3-F  
 Vail # : 3  
 Injection Volume : 9 uL  
 Data File Name : Ta162 rac 3-F.lcd  
 Method File Name : IC 90-10 15min 1.0 mL min.lcm  
 Report File Name : Default.lcr  
 Data Acquired : 19/06/2017 13:00:03

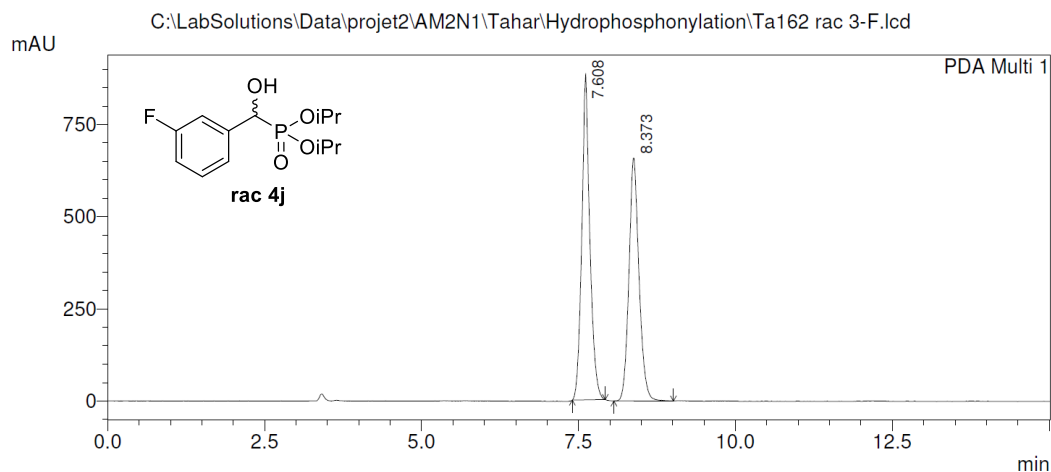

1 PDA Multi 1/195nm 4nm

PeakTable

| Peak# | Ret. Time | Area     | Height  | Area %  |
|-------|-----------|----------|---------|---------|
| 1     | 7.608     | 7861871  | 885309  | 51.450  |
| 2     | 8.373     | 7418733  | 658652  | 48.550  |
| Total |           | 15280604 | 1543961 | 100.000 |

C:\LabSolutions\Data\projet2\AM2N1\Tahar\Hydrophosphonylation\Ta162 chir 3-F.lcd  
 Sample Name : Ta162 chir 3-F  
 Vail # : 4  
 Injection Volume : 9 uL  
 Data File Name : Ta162 chir 3-F.lcd  
 Method File Name : IC 90-10 15min 1.0 mL min.lcm  
 Report File Name : Default.lcr  
 Data Acquired : 19/06/2017 13:15:31

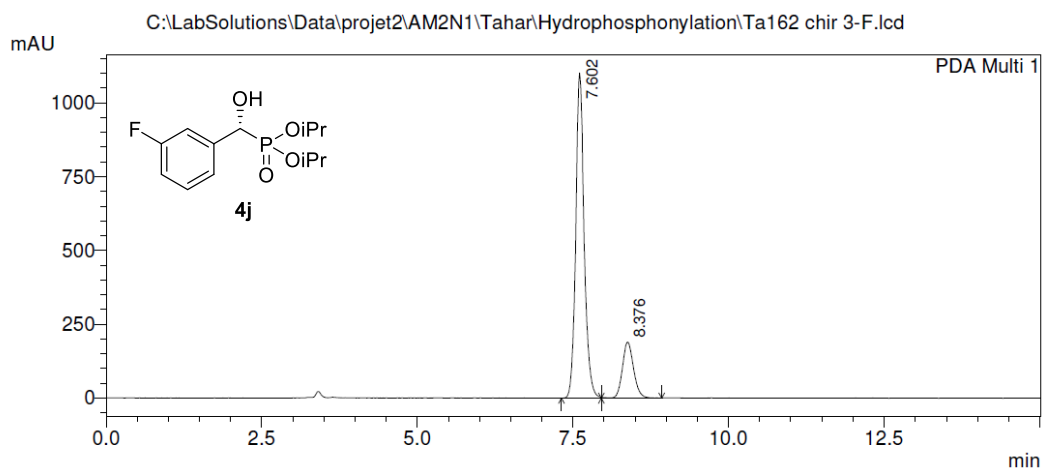

1 PDA Multi 1/195nm 4nm

PeakTable

| Peak# | Ret. Time | Area     | Height  | Area %  |
|-------|-----------|----------|---------|---------|
| 1     | 7.602     | 10305783 | 1101493 | 81.215  |
| 2     | 8.376     | 2383703  | 189995  | 18.785  |
| Total |           | 12689487 | 1291488 | 100.000 |



C:\LabSolutions\Data\proj2\AM2N1\Tahar\Hydrophosphonylation\Ta163 rac 4-F.lcd  
 Sample Name : Ta163 rac 4-F  
 Vial # : 5  
 Injection Volume : 9 uL  
 Data File Name : Ta163 rac 4-F.lcd  
 Method File Name : IC 90-10 15min 1.0 mL min.lcm  
 Report File Name : Default.lcr  
 Data Acquired : 19/06/2017 13:30:58

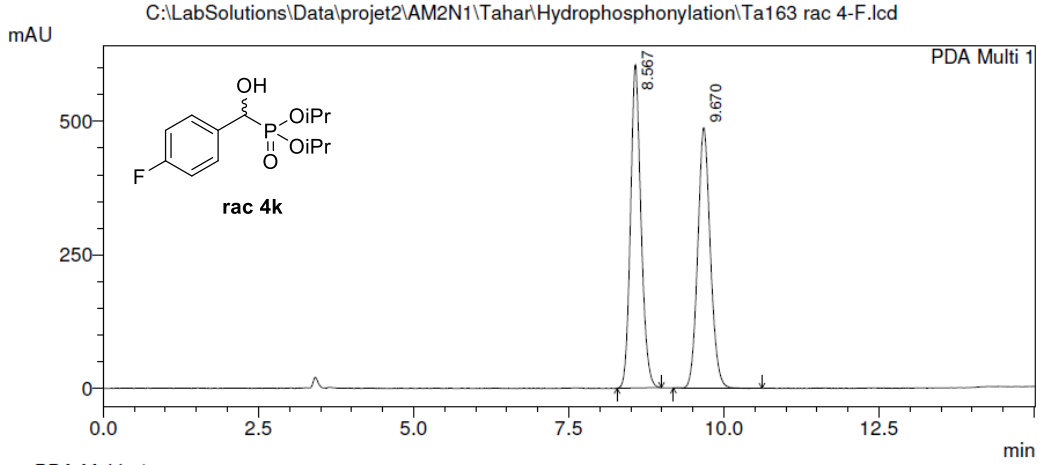

PeakTable

| Peak# | Ret. Time | Area     | Height  | Area %  |
|-------|-----------|----------|---------|---------|
| 1     | 8.567     | 7177471  | 605535  | 50.917  |
| 2     | 9.670     | 6918870  | 488002  | 49.083  |
| Total |           | 14096341 | 1093537 | 100.000 |

C:\LabSolutions\Data\proj2\AM2N1\Tahar\Hydrophosphonylation\Ta163 chir 4-F.lcd  
 Sample Name : Ta163 chir 4-F  
 Vial # : 6  
 Injection Volume : 9 uL  
 Data File Name : Ta163 chir 4-F.lcd  
 Method File Name : IC 90-10 15min 1.0 mL min.lcm  
 Report File Name : Default.lcr  
 Data Acquired : 19/06/2017 13:46:28

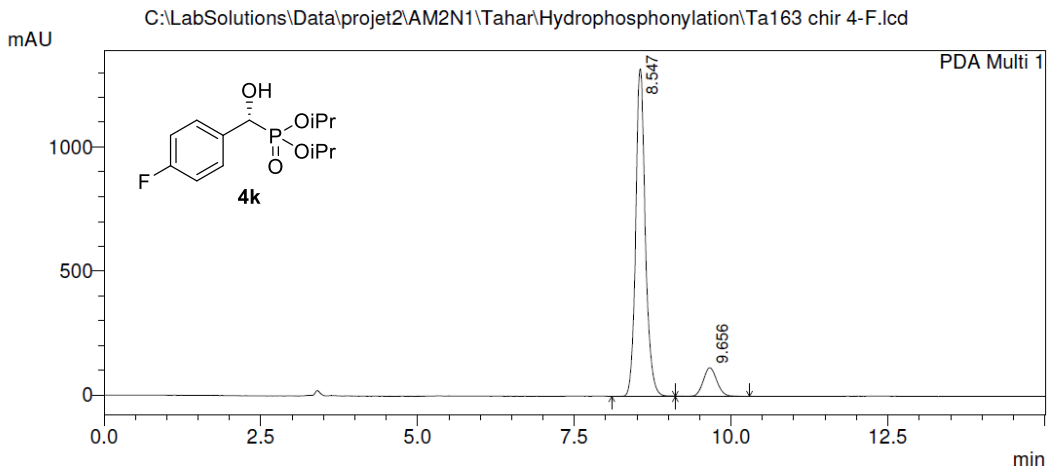

PeakTable

| Peak# | Ret. Time | Area     | Height  | Area %  |
|-------|-----------|----------|---------|---------|
| 1     | 8.547     | 14140058 | 1319686 | 88.969  |
| 2     | 9.656     | 1753201  | 115741  | 11.031  |
| Total |           | 15893259 | 1435427 | 100.000 |

C:\LabSolutions\Data\projet2\AM2N1\Tahar\Hydrophosphonylation\Ta164 rac 4-Cl.lcd  
 Sample Name : Ta164 rac 4-Cl  
 Vail # : 1  
 Injection Volume : 9 uL  
 Data File Name : Ta164 rac 4-Cl.lcd  
 Method File Name : AS-H 90-10 15min 1.0 mL min.lcm  
 Report File Name : Default.lcr  
 Data Acquired : 19/06/2017 10:04:22

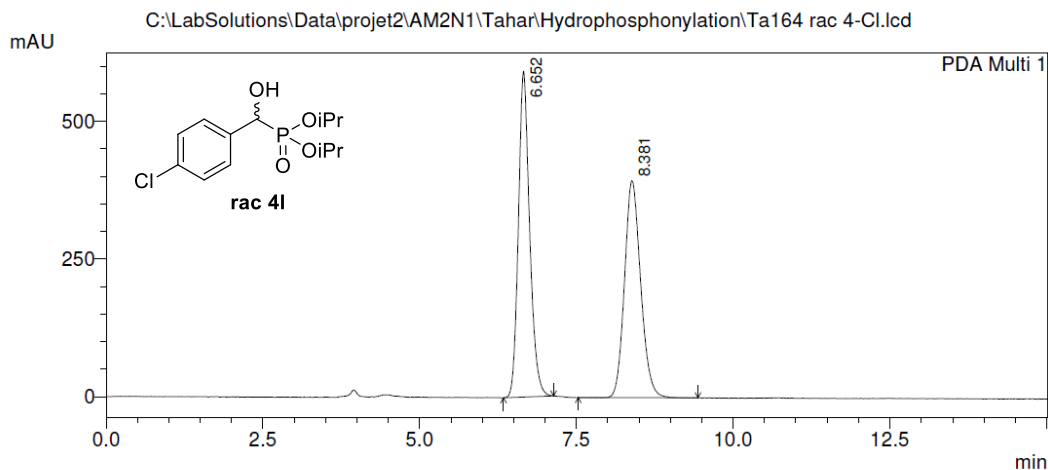

PeakTable

PDA Ch1 195nm 4nm

| Peak# | Ret. Time | Area     | Height | Area %  |
|-------|-----------|----------|--------|---------|
| 1     | 6.652     | 7438333  | 590925 | 51.193  |
| 2     | 8.381     | 7091714  | 393934 | 48.807  |
| Total |           | 14530047 | 984859 | 100.000 |

C:\LabSolutions\Data\projet2\AM2N1\Tahar\Hydrophosphonylation\Ta164 chir 4-Cl.lcd  
 Sample Name : Ta164 chir 4-Cl  
 Vail # : 2  
 Injection Volume : 9 uL  
 Data File Name : Ta164 chir 4-Cl.lcd  
 Method File Name : AS-H 90-10 15min 1.0 mL min.lcm  
 Report File Name : Default.lcr  
 Data Acquired : 19/06/2017 10:19:55

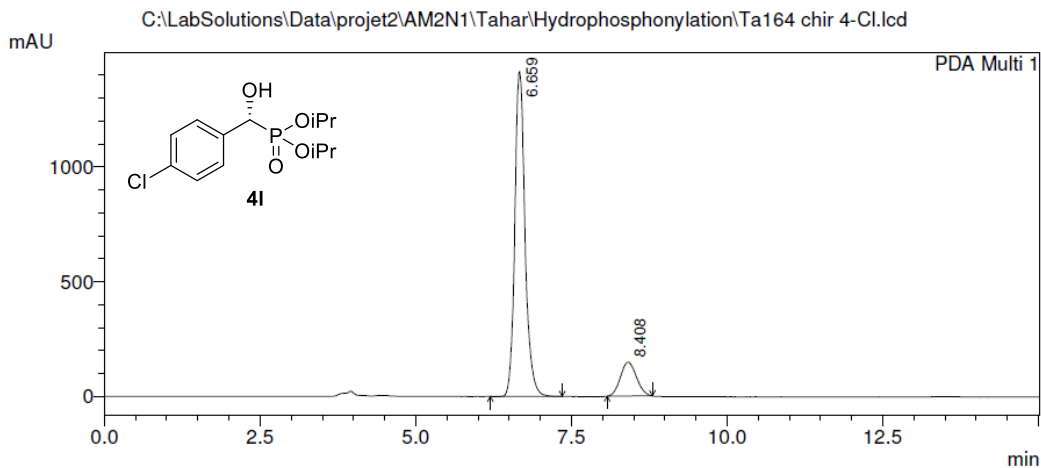

PeakTable

PDA Ch1 195nm 4nm

| Peak# | Ret. Time | Area     | Height  | Area %  |
|-------|-----------|----------|---------|---------|
| 1     | 6.659     | 16203204 | 1417271 | 85.955  |
| 2     | 8.408     | 2647703  | 147780  | 14.045  |
| Total |           | 18850906 | 1565051 | 100.000 |

C:\LabSolutions\Data\projet2\AM2N1\Tahar\Hydrophosphonylation\Ta165 rac 4-CF3.lcd  
 Sample Name : Ta165 rac 4-CF3  
 Vail # : 7  
 Injection Volume : 9 uL  
 Data File Name : Ta165 rac 4-CF3.lcd  
 Method File Name : IC 95-5 15min 1.0 mL min.lcm  
 Report File Name : Default.lcr  
 Data Acquired : 19/06/2017 14:35:10

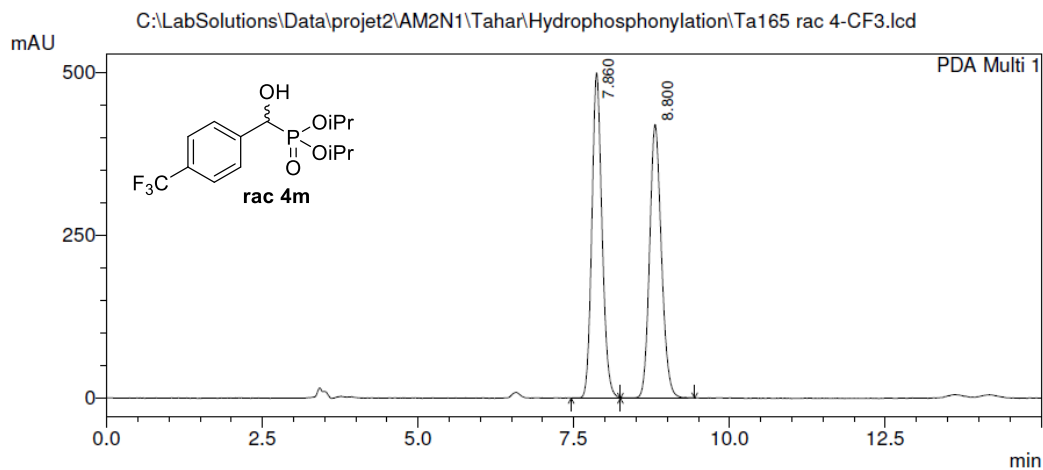

1 PDA Multi 1/195nm 4nm

PeakTable

| Peak# | Ret. Time | Area     | Height | Area %  |
|-------|-----------|----------|--------|---------|
| 1     | 7.860     | 5671921  | 499621 | 50.500  |
| 2     | 8.800     | 5559678  | 419930 | 49.500  |
| Total |           | 11231598 | 919550 | 100.000 |

C:\LabSolutions\Data\projet2\AM2N1\Tahar\Hydrophosphonylation\Ta165 chir 4-CF3.lcd  
 Sample Name : Ta165 chir 4-CF3  
 Vail # : 8  
 Injection Volume : 9 uL  
 Data File Name : Ta165 chir 4-CF3.lcd  
 Method File Name : IC 95-5 15min 1.0 mL min.lcm  
 Report File Name : Default.lcr  
 Data Acquired : 19/06/2017 14:50:37

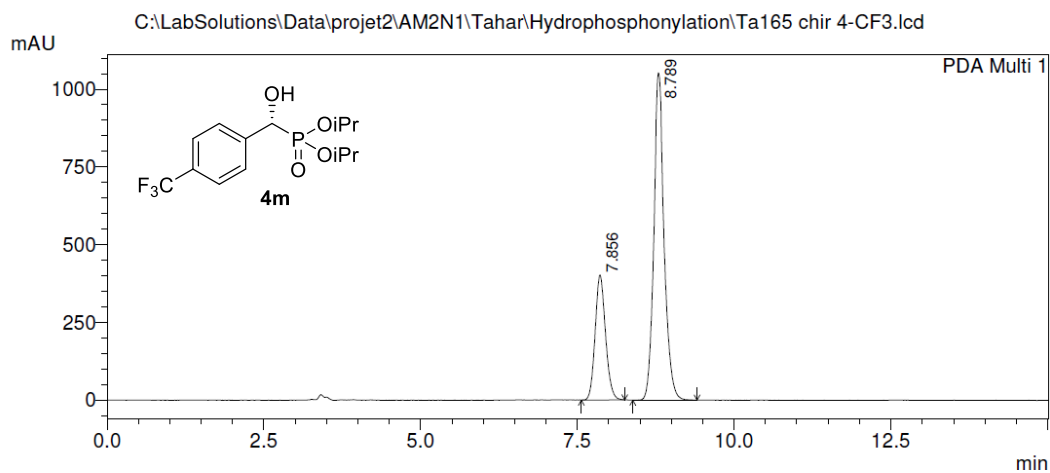

1 PDA Multi 1/195nm 4nm

PeakTable

| Peak# | Ret. Time | Area     | Height  | Area %  |
|-------|-----------|----------|---------|---------|
| 1     | 7.856     | 4618824  | 402751  | 27.928  |
| 2     | 8.789     | 11919363 | 1052148 | 72.072  |
| Total |           | 16538187 | 1454899 | 100.000 |

C:\LabSolutions\Data\projet2\AM2N1\Tahar\Hydrophosphonylation\Ta160 2-Naphthyl rac.lcd  
 Sample Name : Ta160 2-Naphthyl rac  
 Vail # : 1  
 Injection Volume : 4 uL  
 Data File Name : Ta160 2-Naphthyl rac.lcd  
 Method File Name : IC 90-10 25min 1.0 mL min.lcm  
 Report File Name : Default.lcr  
 Data Acquired : 20/06/2017 17:18:51

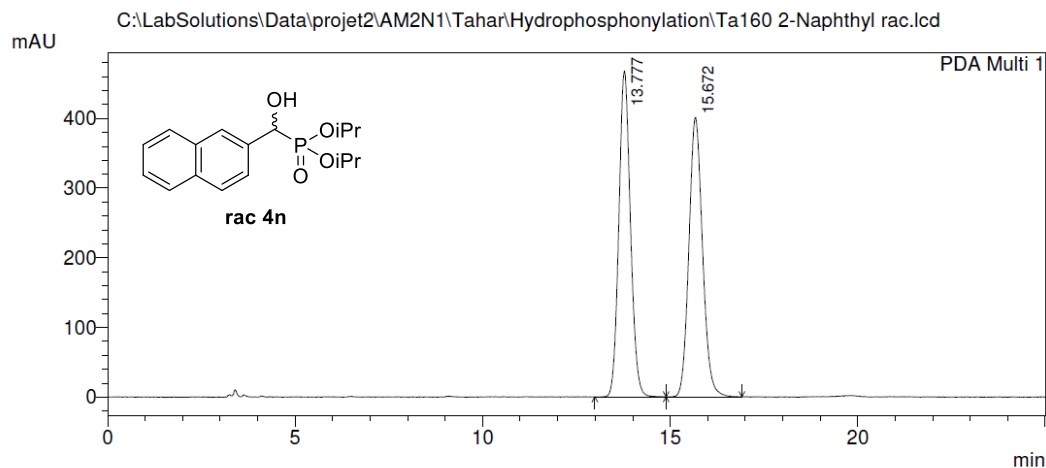

PeakTable

| Peak# | Ret. Time | Area     | Height | Area %  |
|-------|-----------|----------|--------|---------|
| 1     | 13.777    | 10065690 | 467846 | 49.864  |
| 2     | 15.672    | 10120522 | 401351 | 50.136  |
| Total |           | 20186213 | 869196 | 100.000 |

C:\LabSolutions\Data\projet2\AM2N1\Tahar\Hydrophosphonylation\Ta160 2-Naphthyl chir.lcd  
 Sample Name : Ta160 2-Naphthyl chir  
 Vail # : 2  
 Injection Volume : 4 uL  
 Data File Name : Ta160 2-Naphthyl chir.lcd  
 Method File Name : IC 90-10 25min 1.0 mL min.lcm  
 Report File Name : Default.lcr  
 Data Acquired : 20/06/2017 17:44:18

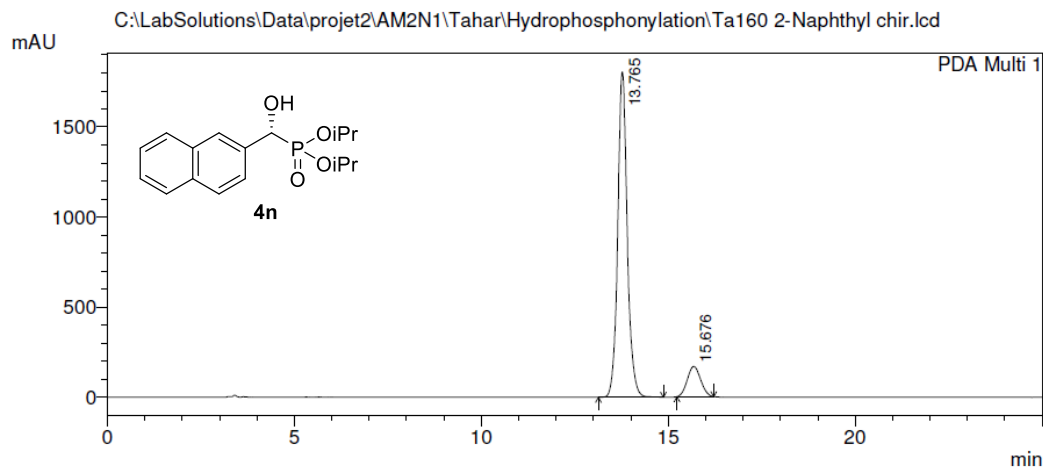

PeakTable

| Peak# | Ret. Time | Area     | Height  | Area %  |
|-------|-----------|----------|---------|---------|
| 1     | 13.765    | 32192049 | 1804889 | 88.517  |
| 2     | 15.676    | 4176366  | 168239  | 11.483  |
| Total |           | 36368415 | 1973128 | 100.000 |

C:\LabSolutions\Data\projet2\AM2N1\Tahar\Hydrophosphonylation\Ta159 1-Naphthyl rac.lcd  
 Sample Name : Ta159 1-Naphthyl rac  
 Vial # : 3  
 Injection Volume : 4 uL  
 Data File Name : Ta159 1-Naphthyl rac.lcd  
 Method File Name : IC 90-10 30min 1.0 mL min.lcm  
 Report File Name : Default.lcr  
 Data Acquired : 20/06/2017 18:09:45

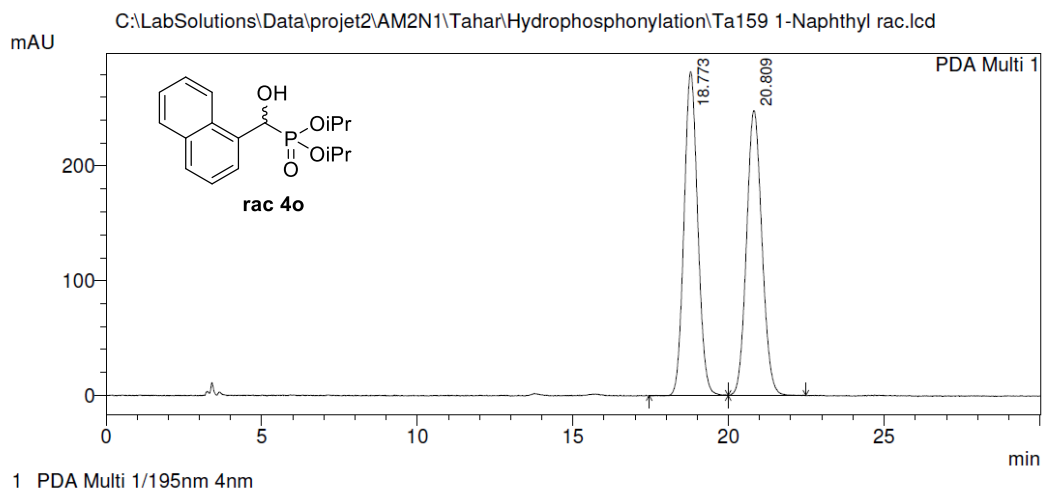

PeakTable

| Peak# | Ret. Time | Area     | Height | Area %  |
|-------|-----------|----------|--------|---------|
| 1     | 18.773    | 8616140  | 282107 | 50.132  |
| 2     | 20.809    | 8570597  | 248400 | 49.868  |
| Total |           | 17186737 | 530507 | 100.000 |

C:\LabSolutions\Data\projet2\AM2N1\Tahar\Hydrophosphonylation\Ta159 1-Naphthyl chir.lcd  
 Sample Name : Ta159 1-Naphthyl chir  
 Vial # : 4  
 Injection Volume : 4 uL  
 Data File Name : Ta159 1-Naphthyl chir.lcd  
 Method File Name : IC 90-10 30min 1.0 mL min.lcm  
 Report File Name : Default.lcr  
 Data Acquired : 20/06/2017 18:40:13

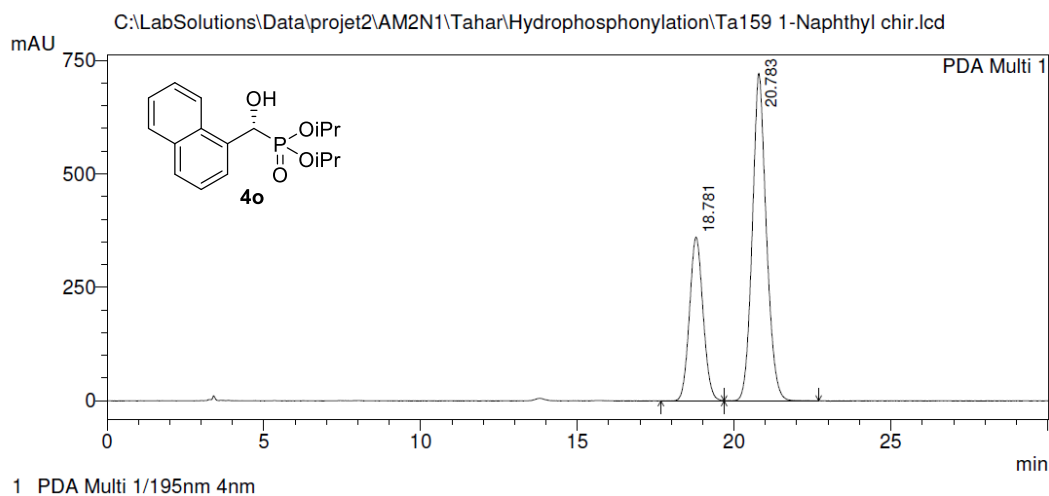

PeakTable

| Peak# | Ret. Time | Area     | Height  | Area %  |
|-------|-----------|----------|---------|---------|
| 1     | 18.781    | 10867848 | 360975  | 32.585  |
| 2     | 20.783    | 22484389 | 721960  | 67.415  |
| Total |           | 33352237 | 1082935 | 100.000 |

C:\LabSolutions\Data\projet2\AM2N1\Tahar\Hydrophosphonylation\Ta166 rac fural.lcd  
 Sample Name : Ta166 rac fural  
 Vail # : 3  
 Injection Volume : 9 uL  
 Data File Name : Ta166 rac fural.lcd  
 Method File Name : AS-H 90-10 45min 1.0 mL min.lcm  
 Report File Name : Default.lcr  
 Data Acquired : 19/06/2017 10:35:22

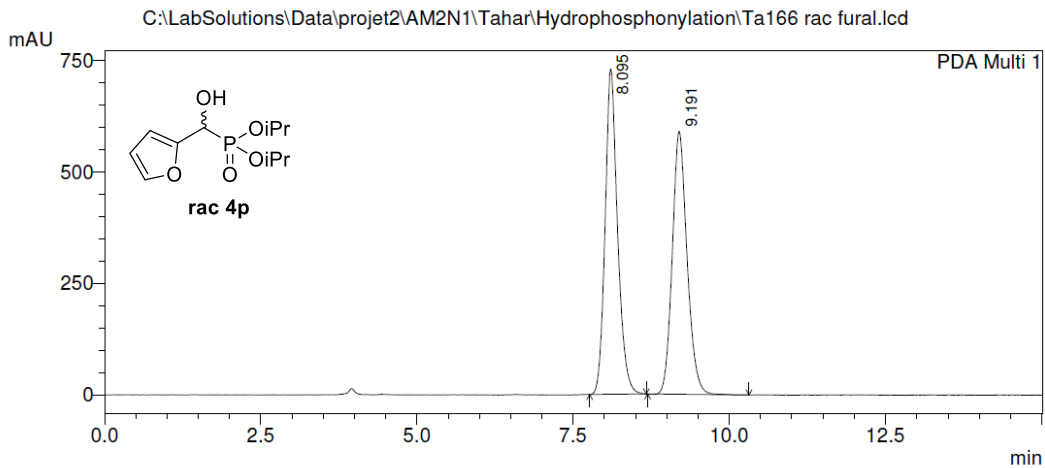

PeakTable

| Peak# | Ret. Time | Area     | Height  | Area %  |
|-------|-----------|----------|---------|---------|
| 1     | 8.095     | 10080925 | 729456  | 51.029  |
| 2     | 9.191     | 9674325  | 590515  | 48.971  |
| Total |           | 19755250 | 1319971 | 100.000 |

C:\LabSolutions\Data\projet2\AM2N1\Tahar\Hydrophosphonylation\Ta166 chir fural.lcd  
 Sample Name : Ta166 chir fural  
 Vail # : 4  
 Injection Volume : 9 uL  
 Data File Name : Ta166 chir fural.lcd  
 Method File Name : AS-H 90-10 15min 1.0 mL min.lcm  
 Report File Name : Default.lcr  
 Data Acquired : 19/06/2017 10:50:48

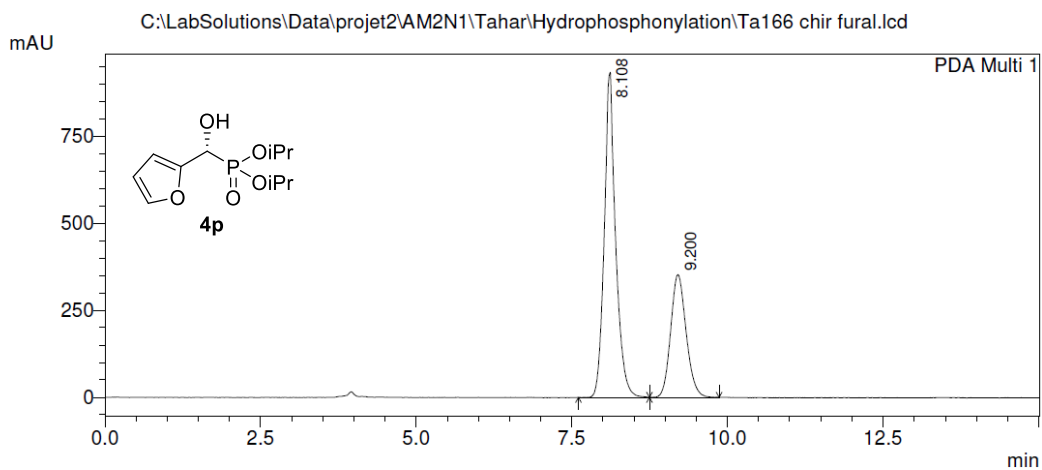

PeakTable

| Peak# | Ret. Time | Area     | Height  | Area %  |
|-------|-----------|----------|---------|---------|
| 1     | 8.108     | 11816767 | 933993  | 65.971  |
| 2     | 9.200     | 6095294  | 352847  | 34.029  |
| Total |           | 17912061 | 1286840 | 100.000 |
